# Supplementary material for: Synthesis of difluoromethylselenoesters from aldehydes via a radical process
Source: Royal Society of Chemistry journal article supplement (doi:10.1039/d0cc02912b), 2020-01-01

## Supporting Information

### Synthesis of Difluoromethylselenoesters from Aldehydes via a Radical Process

Rui-Li Guo, Xue-Qing Zhu, Xing-Long Zhang and Yong-Qiang Wang\*

Key Laboratory of Synthetic and Natural Functional Molecule Chemistry of Ministry  
of Education, College of Chemistry & Materials Science, Northwest University, Xi'an  
710069, People's Republic of China

#### Table of Contents

|                                                                                                           |     |
|-----------------------------------------------------------------------------------------------------------|-----|
| 1. General information .....                                                                              | S1  |
| 2. General procedure .....                                                                                | S1  |
| 3. Characterization datas for compounds <b>2b</b> – <b>3cc</b> .....                                      | S3  |
| 4. Procedures for radical mechanism experiment .....                                                      | S22 |
| 5. References .....                                                                                       | S26 |
| 6. <sup>1</sup> H, <sup>19</sup> F, <sup>13</sup> C NMR spectra of compounds <b>2b</b> – <b>3cc</b> ..... | S27 |
| 7. X-ray crystal structure of compounds <b>3g</b> and <b>3ad</b> .....                                    | S94 |

## 1. General information

All reactions were carried out under one atmosphere. All reagents were used as received unless otherwise noted. Flash chromatography was performed with silica gel (200-300 mesh). NMR spectra were recorded on a Bruker Ascend 400 spectrometer at 400 MHz ( $^1\text{H}$  NMR), 101 MHz ( $^{13}\text{C}$  NMR), 376 MHz ( $^{19}\text{F}$  NMR), on a Bruker Ascend 600 spectrometer at 600 MHz ( $^1\text{H}$  NMR), 151 MHz ( $^{13}\text{C}$  NMR) or on a JEOL ECZ400R spectrometer at 376 MHz ( $^{19}\text{F}$  NMR).  $^1\text{H}$  NMR chemical shifts are reported in delta ( $\delta$ ) units, in parts per million (ppm) downfield from tetramethylsilane. Splitting patterns are designated as s, singlet; d, doublet; t, triplet; m, multiplet, br, broad. Coupling constants  $J$  are quoted in Hz. Spectra are referenced internally to the residual proton resonance in  $\text{CDCl}_3$  ( $\delta$  7.26 ppm), or with tetramethylsilane (TMS,  $\delta$  0.00 ppm) as the internal standard.  $^{13}\text{C}$  NMR chemical shifts are reported in ppm relative to the center line of a triplet at 77.16 ppm for chloroform- $d$ .  $^{19}\text{F}$  NMR chemical shifts are reported relative to internal standard  $\text{CFCl}_3$  at 0.0 ppm. Infrared (IR) data were recorded as films on potassium bromide plates on a Bruker Tensor 27 FT-IR spectrometer. Absorbance frequencies are reported in reciprocal centimeters ( $\text{cm}^{-1}$ ). Mass spectra were acquired on a Bruker Daltonics S2 MicroTof-Q II mass spectrometer. X-ray crystal structure analyses were measured on Bruker Smart APEXII CCD instrument using Mo- $K\alpha$  radiation. The structures were solved and refined using the SHELXTL software package. **2a**,<sup>1</sup> **2b**,<sup>1</sup> **2c**, **2d**,<sup>2</sup> **1ad**,<sup>3</sup> **1ae**,<sup>4</sup> **1ca**,<sup>5</sup> **1cb**,<sup>6</sup> **1cc**<sup>7</sup> were prepared according to literature methods.

## 2. General procedure

Synthesis of **2b**: To a dry two-necked 100 mL flask bottomed flask equipped with a magnetic stirrer were added (benzylselanyl)carbonitrile (15.76 g, 80 mmol, 1.0 equiv). The flask was

evacuated and refilled with argon three times. Then, anhydrous DMF (40 mL), TMSCF<sub>2</sub>H (20 mL, 160 mmol, 2.0 equiv) were sequentially added to the system via syringe. The reaction mixture was cooled to 0 °C, and CsF (36.45 g, 240 mmol, 3.0 equiv) was carefully added. The reaction was stirred at 0 °C under an argon atmosphere for 72 h. The reaction mixture was then partitioned between water and pentane. The layers were separated and the organic layer was washed with aqueous saturated brine solution, and then dried over MgSO<sub>4</sub>. After removing the pentane by rotary evaporation, the residue was purified by flash chromatography on silica gel to give **2b** as a colorless oil.

Synthesis of **2c**: To a flask equipped with a magnetic stir bar were added the benzyl(difluoromethyl)silane (2.21 g, 10 mmol, 1.0 equiv.), sulfur chloride (0.8 mL, 10 mmol, 1.0 equiv.) and anhydrous THF (5 mL). The reaction mixture was stirred at 0 °C for 1 h and then cooled down to -78 °C. Anhydrous DCM (25 mL) was added followed by sodium benzenesulfinate (1.81 g, 11 mmol, 1.1 equiv.). The reaction was stirred until complete conversion of the active reagent ClSeCF<sub>2</sub>H at -78 °C. The reaction mixture was then filtered over a pad of silica (rinsed with DCM) and the filtrate was concentrated to dryness. The crude residue was purified by chromatography to afford the desired product **2c** as a yellow oil.

For **3a-3cc**: A 10 mL round bottomed flask equipped with a stirring bar was charged with benzyl(difluoromethyl)silane (121 mg, 0.5 mmol, 1.0 equiv), aldehydes (0.75 mmol, 1.5 equiv), and DCE (2.5 mL) followed by sequential addition of AIBN (164 mg, 1.0 mmol, 2.0 equiv). The reaction was allowed to stir at 50 °C under an argon atmosphere for 24 h. The solvent was filtered and the filtrate was evaporated in vacuo. The residue was purified by flash chromatography on silica gel.

### 3. Characterization datas for compounds 2b – 3cc

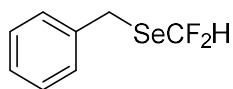

**Benzyl(difluoromethyl)selane (2b).** Colorless oil (36%). Eluant: ethyl acetate/petroleum ether (1:100,  $R_f = 0.40$ ).  $^1\text{H}$  NMR (400 MHz,  $\text{CDCl}_3$ )  $\delta$  7.34 – 7.23 (m, 5H), 7.05 (t,  $J = 55.2$  Hz, 1H), 4.09 (s, 2H);  $^{19}\text{F}$  NMR (376 MHz,  $\text{CDCl}_3$ )  $\delta$  -92.88 (d,  $J = 55.2$  Hz, 2F);  $^{13}\text{C}$  NMR (101 MHz,  $\text{CDCl}_3$ )  $\delta$  137.4, 129.1 (2C), 128.9 (2C), 127.5, 115.8 (t,  $J = 287.0$  Hz), 26.4 (t,  $J = 2.9$  Hz). IR (KBr):  $\nu = 3030, 1495, 1454, 1295, 1191, 1059, 911, 759, 697, 607$   $\text{cm}^{-1}$ . HRMS (ESI) for  $\text{C}_8\text{H}_8\text{F}_2\text{SeNa}^+$  ( $\text{M}+\text{Na}^+$ ): Calcd: 244.9651, Found: 244.9652.

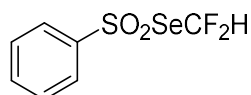

**Se-(difluoromethyl)-benzenesulfonoselanoate (2c).** Yellow oil (65%). Eluant: ethyl acetate/petroleum ether (1:50,  $R_f = 0.30$ ).  $^1\text{H}$  NMR (400 MHz,  $\text{CDCl}_3$ )  $\delta$  7.91 (d,  $J = 7.7$  Hz, 2H), 7.68 (t,  $J = 7.4$  Hz, 1H), 7.64 (t,  $J = 54.2$  Hz, 1H), 7.58 (t,  $J = 7.8$  Hz, 2H);  $^{19}\text{F}$  NMR (376 MHz,  $\text{CDCl}_3$ )  $\delta$  -90.44 (d,  $J = 54.1$  Hz, 2F);  $^{13}\text{C}$  NMR (101 MHz,  $\text{CDCl}_3$ )  $\delta$  147.9, 134.6, 129.7 (2C), 126.6 (2C), 120.6 (t,  $J = 293.7$  Hz). IR (KBr):  $\nu = 2926, 1448, 1329, 1138, 1064, 906, 681, 650, 577, 528$   $\text{cm}^{-1}$ . HRMS (ESI) for  $\text{C}_7\text{H}_6\text{F}_2\text{O}_2\text{SSeNa}^+$  ( $\text{M}+\text{Na}^+$ ): Calcd: 294.9114, Found: 294.9113.

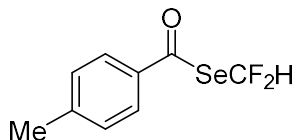

**Se-(difluoromethyl)-4-methylbenzoselanoate (3a).** Yellow solid (113 mg, 90%). Mp: 46-47 °C. Eluant: ethyl acetate/petroleum ether (1:100,  $R_f = 0.30$ ).  $^1\text{H}$  NMR (400 MHz,  $\text{CDCl}_3$ )  $\delta$  7.71 (d,  $J = 8.2$  Hz, 2H), 7.61 (t,  $J = 53.6$  Hz, 1H), 7.30 (d,  $J = 8.1$  Hz, 2H), 2.43 (s, 3H);  $^{19}\text{F}$  NMR (376 MHz,  $\text{CDCl}_3$ )  $\delta$  -96.08 (d,  $J = 53.6$  Hz, 2F);  $^{13}\text{C}$  NMR (101 MHz,  $\text{CDCl}_3$ )  $\delta$  190.5 (t,  $J = 2.8$  Hz), 146.3, 135.4 (t,  $J = 2.5$  Hz), 130.0 (2C), 127.9 (2C), 120.4 (t,  $J = 283.3$  Hz), 22.0. IR (KBr):  $\nu =$

2922, 1690, 1603, 1456, 1269, 1177, 1051, 816, 621  $\text{cm}^{-1}$ . HRMS (ESI) for  $\text{C}_9\text{H}_8\text{F}_2\text{OSeNa}$  ( $\text{M}+\text{Na}^+$ ): Calcd: 272.9601, Found: 272.9598.

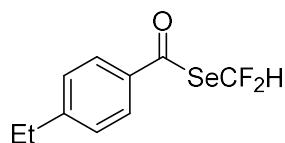

**Se-(difluoromethyl)-4-ethylbenzoselenoate (3b).** Yellow oil (109 mg, 82%). Eluant: ethyl acetate/petroleum ether (1:100,  $R_f = 0.30$ ).  $^1\text{H}$  NMR (600 MHz,  $\text{CDCl}_3$ )  $\delta$  7.73 (d,  $J = 8.2$  Hz, 2H), 7.61 (t,  $J = 53.6$  Hz, 1H), 7.32 (d,  $J = 8.2$  Hz, 2H), 2.72 (q,  $J = 7.6$  Hz, 2H), 1.27 (t,  $J = 7.6$  Hz, 3H);  $^{19}\text{F}$  NMR (376 MHz,  $\text{CDCl}_3$ )  $\delta$  -96.09 (d,  $J = 53.6$  Hz, 2F);  $^{13}\text{C}$  NMR (151 MHz,  $\text{CDCl}_3$ )  $\delta$  190.5(t,  $J = 4.2$  Hz), 152.4, 135.6(t,  $J = 2.5$  Hz), 128.9 (2C), 128.0 (2C), 120.4 (t,  $J = 283.2$  Hz), 29.2, 15.1. IR (KBr):  $\nu = 2926, 1696, 1604, 1270, 1210, 1176, 1073, 880, 842, 767, 691, 611$   $\text{cm}^{-1}$ . HRMS (ESI) for  $\text{C}_{10}\text{H}_{10}\text{F}_2\text{OSeNa}$  ( $\text{M}+\text{Na}^+$ ): Calcd: 286.9757, Found: 286.9760.

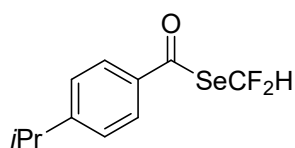

**Se-(difluoromethyl)-4-isopropylbenzoselenoate (3c).** Yellow oil (102 mg, 73%). Eluant: ethyl acetate/petroleum ether (1:100,  $R_f = 0.30$ ).  $^1\text{H}$  NMR (400 MHz,  $\text{CDCl}_3$ )  $\delta$  7.74 (d,  $J = 8.3$  Hz, 2H), 7.61 (t,  $J = 53.6$  Hz, 1H), 7.35 (d,  $J = 8.3$  Hz, 2H), 3.20 – 2.76 (m, 1H), 1.27 (d,  $J = 6.9$  Hz, 6H);  $^{19}\text{F}$  NMR (376 MHz,  $\text{CDCl}_3$ )  $\delta$  -96.08 (d,  $J = 53.6$  Hz, 2F);  $^{13}\text{C}$  NMR (101 MHz,  $\text{CDCl}_3$ )  $\delta$  190.5 (t,  $J = 2.9$  Hz), 157.0, 135.7 (t,  $J = 2.6$  Hz), 128.0 (2C), 127.5 (2C), 120.4(t,  $J = 283.3$  Hz), 34.6, 23.7 (2C). IR (KBr):  $\nu = 2962, 2925, 1690, 1603, 1463, 1414, 1269, 1210, 1179, 1055, 875, 841, 747, 689, 626, 610$   $\text{cm}^{-1}$ . HRMS (ESI) for  $\text{C}_{11}\text{H}_{12}\text{F}_2\text{OSeNa}$  ( $\text{M}+\text{Na}^+$ ): Calcd: 300.9914, Found: 300.9907.

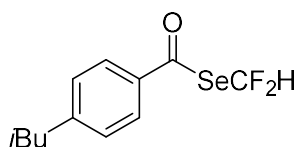

***Se*-(difluoromethyl)-4-isobutylbenzoselenoate (3d)**. Yellow oil (135 mg, 92%). Eluant: ethyl acetate/petroleum ether (1:100,  $R_f = 0.30$ ).  $^1\text{H}$  NMR (400 MHz,  $\text{CDCl}_3$ )  $\delta$  7.72 (d,  $J = 8.3$  Hz, 2H), 7.61 (d,  $J = 53.6$  Hz, 1H), 7.27 (d,  $J = 8.1$  Hz, 2H), 2.54 (d,  $J = 7.2$  Hz, 2H), 1.96 – 1.85 (m, 1H), 0.91 (d,  $J = 6.6$  Hz, 6H);  $^{19}\text{F}$  NMR (376 MHz,  $\text{CDCl}_3$ )  $\delta$  -96.08 (d,  $J = 53.6$  Hz, 2F);  $^{13}\text{C}$  NMR (101 MHz,  $\text{CDCl}_3$ )  $\delta$  190.5 (t,  $J = 2.9$  Hz), 150.0, 135.6 (t,  $J = 2.6$  Hz), 130.0 (2C), 127.8 (2C), 120.4 (t,  $J = 283.3$  Hz), 45.6, 30.2, 22.4 (2C). IR (KBr):  $\nu = 2957, 2925, 1687, 1604, 1466, 1413, 1270, 1207, 1176, 1071, 879, 818, 792, 691, 652, 623$   $\text{cm}^{-1}$ . HRMS (ESI) for  $\text{C}_{12}\text{H}_{14}\text{F}_2\text{OSeNa}$  ( $\text{M}+\text{Na}^+$ ): Calcd: 315.0070, Found: 315.0070.

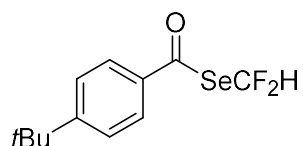

***Se*-(difluoromethyl)-4-(tert-butyl)benzoselenoate (3e)**. Yellow solid (130 mg, 89%). Mp: 58-59 °C. Eluant: ethyl acetate/petroleum ether (1:100,  $R_f = 0.30$ ).  $^1\text{H}$  NMR (400 MHz,  $\text{CDCl}_3$ )  $\delta$  7.75 (d,  $J = 8.3$  Hz, 2H), 7.62 (t,  $J = 53.6$  Hz, 1H), 7.51 (d,  $J = 8.4$  Hz, 2H), 1.35 (s, 9H);  $^{19}\text{F}$  NMR (376 MHz,  $\text{CDCl}_3$ )  $\delta$  -96.08 (d,  $J = 53.6$  Hz, 2F);  $^{13}\text{C}$  NMR (101 MHz,  $\text{CDCl}_3$ )  $\delta$  190.5 (t,  $J = 2.9$  Hz), 159.2, 135.2 (t,  $J = 2.6$  Hz), 127.7 (2C), 126.3 (2C), 120.4 (t,  $J = 283.2$  Hz), 35.5, 31.1 (3C). IR (KBr):  $\nu = 2965, 1683, 1597, 1267, 1215, 1180, 1106, 1072, 1050, 881, 721, 690, 590$   $\text{cm}^{-1}$ . HRMS (ESI) for  $\text{C}_{12}\text{H}_{14}\text{F}_2\text{OSeNa}$  ( $\text{M}+\text{Na}^+$ ): Calcd: 315.0070, Found: 315.0071.

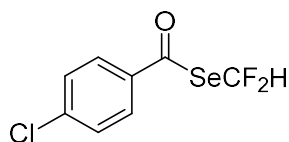

***Se*-(difluoromethyl)-4-chlorobenzoselenoate (3f)**. Yellow solid (103 mg, 76%). Mp: 35-36 °C. Eluant: ethyl acetate/petroleum ether (1:100,  $R_f = 0.30$ ).  $^1\text{H}$  NMR (400 MHz,  $\text{CDCl}_3$ )  $\delta$  7.75 (d,  $J = 8.7$  Hz, 2H), 7.61 (t,  $J = 53.6$  Hz, 1H), 7.49 (d,  $J = 8.7$  Hz, 2H);  $^{19}\text{F}$  NMR (376 MHz,  $\text{CDCl}_3$ )  $\delta$  -95.78 (d,  $J = 53.5$  Hz, 2F);  $^{13}\text{C}$  NMR (101 MHz,  $\text{CDCl}_3$ )  $\delta$  190.0 (t,  $J = 2.9$  Hz), 141.6, 136.2 (t,

$J = 2.6$  Hz), 129.7 (2C), 129.0 (2C), 120.1 (t,  $J = 284.3$  Hz). IR (KBr):  $\nu = 2924, 1689, 1587, 1573, 1486, 1399, 1269, 1202, 1070, 875, 834, 688$   $\text{cm}^{-1}$ . HRMS (ESI) for  $\text{C}_8\text{H}_5\text{ClF}_2\text{OSeNa}$  ( $\text{M}+\text{Na}^+$ ): Calcd: 292.9054, Found: 292.9066.

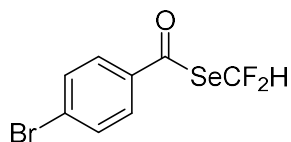

**Se-(difluoromethyl)-4-bromobenzoselenoate (3g).** Yellow solid (85 mg, 54%). Mp: 57-58 °C. Eluant: ethyl acetate/petroleum ether (1:100,  $R_f = 0.30$ ).  $^1\text{H}$  NMR (400 MHz,  $\text{CDCl}_3$ )  $\delta$  7.69 – 7.64 (m, 4H), 7.60 (d,  $J = 53.5$  Hz, 1H);  $^{19}\text{F}$  NMR (376 MHz,  $\text{CDCl}_3$ )  $\delta$  -95.78 (d,  $J = 53.4$  Hz, 2F);  $^{13}\text{C}$  NMR (101 MHz,  $\text{CDCl}_3$ )  $\delta$  190.3 (t,  $J = 2.9$  Hz), 136.7(t,  $J = 2.4$  Hz), 132.7 (2C), 130.3, 129.0 (2C), 120.1 (t,  $J = 284.4$  Hz). IR (KBr):  $\nu = 2923, 1682, 1582, 1482, 1395, 1268, 1199, 1174, 1065, 1009, 874, 816, 705, 686, 615$   $\text{cm}^{-1}$ . HRMS (ESI) for  $\text{C}_8\text{H}_6\text{BrF}_2\text{OSe}$  ( $\text{M}+\text{H}^+$ ): Calcd: 314.8730, Found: 314.8729.

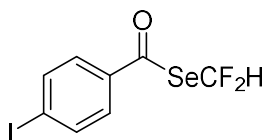

**Se-(difluoromethyl)-4-iodobenzoselenoate (3h).** Yellow solid (85 mg, 47%). Mp: 50-51 °C. Eluant: ethyl acetate/petroleum ether (1:100,  $R_f = 0.30$ ).  $^1\text{H}$  NMR (600 MHz,  $\text{CDCl}_3$ )  $\delta$  7.88 (d,  $J = 8.6$  Hz, 2H), 7.60 (t,  $J = 53.5$  Hz, 1H), 7.51 (d,  $J = 8.6$  Hz, 2H);  $^{19}\text{F}$  NMR (376 MHz,  $\text{CDCl}_3$ )  $\delta$  -95.79 (d,  $J = 53.5$  Hz, 2F);  $^{13}\text{C}$  NMR (101 MHz,  $\text{CDCl}_3$ )  $\delta$  190.6 (t,  $J = 2.9$  Hz), 138.7 (2C), 137.2 (t,  $J = 2.3$  Hz), 128.8 (2C), 120.0 (t,  $J = 284.4$  Hz), 103.2. IR (KBr):  $\nu = 2921, 2851, 1672, 1578, 1561, 1477, 1389, 1263, 1204, 1175, 1114, 1044, 1005, 872, 826, 686, 617$   $\text{cm}^{-1}$ . HRMS (ESI) for  $\text{C}_8\text{H}_5\text{IF}_2\text{OSeNa}$  ( $\text{M}+\text{Na}^+$ ): Calcd: 384.8411, Found: 384.8414.

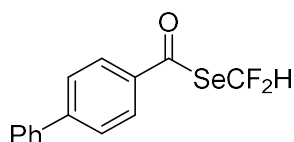

***Se*-(difluoromethyl)-[1,1'-biphenyl]-4-carboselenoate (3i).** Yellow solid (131 mg, 84%). Mp: 77-78 °C. Eluant: ethyl acetate/petroleum ether (1:100,  $R_f = 0.30$ ).  $^1\text{H}$  NMR (400 MHz,  $\text{CDCl}_3$ )  $\delta$  7.85 (d,  $J = 8.5$  Hz, 2H), 7.68 (d,  $J = 8.5$  Hz, 2H), 7.63 (t,  $J = 53.6$  Hz, 1H), 7.62 – 7.57 (m, 2H), 7.49 – 7.44 (m, 2H), 7.44 – 7.38 (m, 1H);  $^{19}\text{F}$  NMR (376 MHz,  $\text{CDCl}_3$ )  $\delta$  -95.89 (d,  $J = 53.6$  Hz, 2F);  $^{13}\text{C}$  NMR (101 MHz,  $\text{CDCl}_3$ )  $\delta$  190.5 (t,  $J = 2.8$  Hz), 147.8, 139.3, 136.4 (t,  $J = 2.4$  Hz), 129.2 (2C), 128.9, 128.3 (2C), 127.9 (2C), 127.4 (2C), 120.3 (t,  $J = 283.7$  Hz). IR (KBr):  $\nu = 2922$ , 1680, 1600, 1200, 1182, 1085, 1047, 891, 768, 688  $\text{cm}^{-1}$ . HRMS (ESI) for  $\text{C}_{14}\text{H}_{10}\text{F}_2\text{OSeNa}$  ( $\text{M}+\text{Na}^+$ ): Calcd: 334.9757, Found: 334.9753.

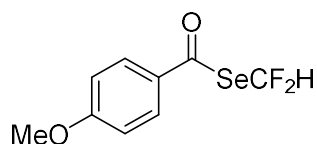

***Se*-(difluoromethyl)-4-methoxybenzoselenoate (3j).** Yellow solid (100 mg, 75%). Mp: 38-39 °C. Eluant: ethyl acetate/petroleum ether (1:30,  $R_f = 0.30$ ).  $^1\text{H}$  NMR (400 MHz,  $\text{CDCl}_3$ )  $\delta$  7.77 (d,  $J = 8.9$  Hz, 2H), 7.60 (t,  $J = 53.6$  Hz, 1H), 6.95 (d,  $J = 8.9$  Hz, 2H), 3.88 (s, 3H);  $^{19}\text{F}$  NMR (376 MHz,  $\text{CDCl}_3$ )  $\delta$  -95.95 (d,  $J = 53.6$  Hz, 2F);  $^{13}\text{C}$  NMR (101 MHz,  $\text{CDCl}_3$ )  $\delta$  188.8 (t,  $J = 2.8$  Hz), 165.1, 130.6 (t,  $J = 2.5$  Hz), 130.2 (2C), 120.5 (t,  $J = 283.0$  Hz), 114.5 (2C), 55.8. IR (KBr):  $\nu = 2936$ , 1686, 1596, 1575, 1507, 1265, 1211, 1165, 1059, 1026, 878, 835, 784, 691, 648, 611  $\text{cm}^{-1}$ . HRMS (ESI) for  $\text{C}_9\text{H}_8\text{F}_2\text{O}_2\text{SeNa}$  ( $\text{M}+\text{Na}^+$ ): Calcd: 288.9550, Found: 288.9548.

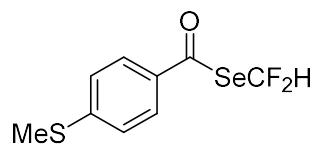

***Se*-(difluoromethyl)-4-(methylthio)benzoselenoate (3k).** Yellow solid (115 mg, 81%). Mp: 65-66 °C. Eluant: ethyl acetate/petroleum ether (1:50,  $R_f = 0.30$ ).  $^1\text{H}$  NMR (400 MHz,  $\text{CDCl}_3$ )  $\delta$  7.69 (d,  $J = 8.7$  Hz, 2H), 7.61 (t,  $J = 53.6$  Hz, 1H), 7.27 (d,  $J = 8.7$  Hz, 2H), 2.52 (s, 3H);  $^{19}\text{F}$  NMR (376 MHz,  $\text{CDCl}_3$ )  $\delta$  -95.90 (d,  $J = 53.6$  Hz, 2F);  $^{13}\text{C}$  NMR (101 MHz,  $\text{CDCl}_3$ )  $\delta$  189.6 (t,



$J = 2.6$  Hz), 149.0, 133.8 (t,  $J = 2.4$  Hz), 128.0 (2C), 125.3 (2C), 120.4 (t,  $J = 283.5$  Hz), 14.8. IR (KBr):  $\nu = 2923, 1679, 1586, 1488, 1434, 1401, 1322, 1268, 1214, 1185, 1072, 1036, 883, 821, 733, 712, 689, 619$   $\text{cm}^{-1}$ . HRMS (ESI) for  $\text{C}_9\text{H}_8\text{F}_2\text{OSSeNa}$  ( $\text{M}+\text{Na}^+$ ): Calcd: 304.9321, Found: 304.9316.

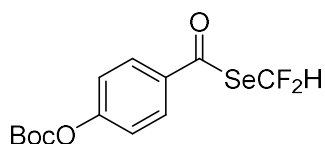

**Se-(difluoromethyl)-4-((tert-butoxycarbonyl)oxy)benzoselenoate (3l).** Yellow solid (127 mg, 72%). Mp: 33-34 °C. Eluant: ethyl acetate/petroleum ether (1:30,  $R_f = 0.30$ ).  $^1\text{H}$  NMR (400 MHz,  $\text{CDCl}_3$ )  $\delta$  7.84 (d,  $J = 8.8$  Hz, 2H), 7.61 (t,  $J = 53.5$  Hz, 1H), 7.33 (d,  $J = 8.8$  Hz, 2H), 1.57 (s, 9H);  $^{19}\text{F}$  NMR (376 MHz,  $\text{CDCl}_3$ )  $\delta$  -95.88 (d,  $J = 53.4$  Hz, 2F);  $^{13}\text{C}$  NMR (101 MHz,  $\text{CDCl}_3$ )  $\delta$  189.8 (t,  $J = 2.8$  Hz), 156.1, 150.8, 135.1 (t,  $J = 2.4$  Hz), 129.3 (2C), 122.1 (2C), 120.2 (t,  $J = 284.0$  Hz), 84.8, 27.8 (3C). IR (KBr):  $\nu = 2983, 1759, 1686, 1599, 1504, 1371, 1272, 1222, 1202, 1140, 1069, 875, 843, 779, 690, 646, 621$   $\text{cm}^{-1}$ . HRMS (ESI) for  $\text{C}_{13}\text{H}_{14}\text{F}_2\text{O}_4\text{SeNa}$  ( $\text{M}+\text{Na}^+$ ): Calcd: 374.9918, Found: 374.9918.

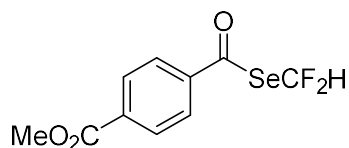

**Methyl-4-(((difluoromethyl)selanyl)carbonyl)benzoate (3m).** Yellow gum (103 mg, 70%). Eluant: ethyl acetate/petroleum ether (1:50,  $R_f = 0.30$ ).  $^1\text{H}$  NMR (400 MHz,  $\text{CDCl}_3$ )  $\delta$  8.16 (d,  $J = 8.1$  Hz, 2H), 7.87 (d,  $J = 8.1$  Hz, 2H), 7.62 (t,  $J = 53.4$  Hz, 1H), 3.96 (s, 3H);  $^{19}\text{F}$  NMR (376 MHz,  $\text{CDCl}_3$ )  $\delta$  -95.85 (d,  $J = 53.4$  Hz, 2F);  $^{13}\text{C}$  NMR (101 MHz,  $\text{CDCl}_3$ )  $\delta$  191.1 (t,  $J = 2.9$  Hz), 165.8, 140.9 (t,  $J = 2.4$  Hz), 135.6, 130.5 (2C), 127.6 (2C), 120.0 (t,  $J = 284.6$  Hz), 52.8. IR (KBr):  $\nu = 2925, 2854, 1728, 1688, 1280, 1198, 1109, 1072, 885, 821, 773, 731, 690$   $\text{cm}^{-1}$ . HRMS (ESI) for  $\text{C}_{10}\text{H}_9\text{F}_2\text{O}_3\text{Se}$  ( $\text{M}+\text{H}^+$ ): Calcd: 294.9679, Found: 294.9685.

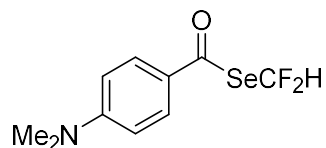

**Se-(difluoromethyl)-4-(dimethylamino)benzoselenoate (3n).** Yellow solid (97 mg, 69%). Mp: 101-102 °C. Eluant: ethyl acetate/petroleum ether (1:50,  $R_f = 0.30$ ).  $^1\text{H}$  NMR (400 MHz,  $\text{CDCl}_3$ )  $\delta$  7.65 (d,  $J = 8.8$  Hz, 2H), 7.60 (t,  $J = 53.9$  Hz, 1H), 6.61 (d,  $J = 8.8$  Hz, 2H), 3.06 (s, 6H);  $^{19}\text{F}$  NMR (376 MHz,  $\text{CDCl}_3$ )  $\delta$  -95.93 (d,  $J = 53.9$  Hz, 2F);  $^{13}\text{C}$  NMR (101 MHz,  $\text{CDCl}_3$ )  $\delta$  186.9 (t,  $J = 2.6$  Hz), 154.7, 130.3 (2C), 124.7 (t,  $J = 2.4$  Hz), 121.0 (t,  $J = 281.7$  Hz), 111.0 (2C), 40.1 (2C). IR (KBr):  $\nu = 2925, 1675, 1593, 1553, 1531, 1376, 1167, 1066, 875, 821$   $\text{cm}^{-1}$ . HRMS (ESI) for  $\text{C}_{10}\text{H}_{11}\text{F}_2\text{NOSeNa}$  ( $\text{M}+\text{Na}^+$ ): Calcd: 301.9866, Found: 301.9868.

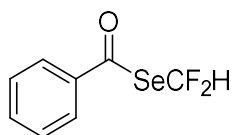

**Se-(difluoromethyl)benzoselenoate (3o).** Yellow gum (102 mg, 86%). Eluant: ethyl acetate/petroleum ether (1:100,  $R_f = 0.30$ ).  $^1\text{H}$  NMR (400 MHz,  $\text{CDCl}_3$ )  $\delta$  7.82 (d,  $J = 7.5$  Hz, 2H), 7.67 (t,  $J = 7.4$  Hz, 1H), 7.62 (d,  $J = 53.5$  Hz, 1H), 7.53 – 7.48 (m, 2H);  $^{19}\text{F}$  NMR (376 MHz,  $\text{CDCl}_3$ )  $\delta$  -96.06 (d,  $J = 53.6$  Hz, 2F);  $^{13}\text{C}$  NMR (101 MHz,  $\text{CDCl}_3$ )  $\delta$  191.2 (t,  $J = 2.8$  Hz), 137.8 (t,  $J = 2.3$  Hz), 135.0, 129.4 (2C), 127.7 (2C), 120.3 (t,  $J = 283.6$  Hz). IR (KBr):  $\nu = 2923, 1689, 1449, 1270, 1203, 1073, 877, 767, 670, 624$   $\text{cm}^{-1}$ . HRMS (ESI) for  $\text{C}_8\text{H}_6\text{F}_2\text{OSeNa}$  ( $\text{M}+\text{Na}^+$ ): Calcd: 258.9444, Found: 258.9444.

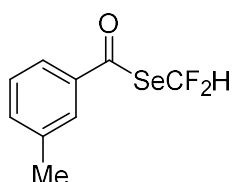

**Se-(difluoromethyl)-3-methylbenzoselenoate (3p).** Yellow gum (80 mg, 64%). Eluant: ethyl acetate/petroleum ether (1:100,  $R_f = 0.30$ ).  $^1\text{H}$  NMR (400 MHz,  $\text{CDCl}_3$ )  $\delta$  7.61 (t,  $J = 53.6$  Hz, 1H),

7.61 – 7.60 (m, 2H), 7.48 – 7.45 (m, 1H), 7.38 (t,  $J = 7.9$  Hz, 1H), 2.43 (s, 3H);  $^{19}\text{F}$  NMR (376 MHz,  $\text{CDCl}_3$ )  $\delta$  -96.14 (d,  $J = 53.6$  Hz, 2F);  $^{13}\text{C}$  NMR (101 MHz,  $\text{CDCl}_3$ )  $\delta$  191.2 (t,  $J = 2.7$  Hz), 139.5, 137.9 (t,  $J = 2.2$  Hz), 135.8, 129.2, 128.1, 125.1, 120.4 (t,  $J = 283.5$  Hz), 21.4. IR (KBr):  $\nu = 2924, 1687, 1600, 1457, 1270, 1242, 1148, 1058, 947, 930, 808, 790, 769, 686, 665$   $\text{cm}^{-1}$ . HRMS (ESI) for  $\text{C}_9\text{H}_8\text{F}_2\text{OSeNa}$  ( $\text{M}+\text{Na}^+$ ): Calcd: 272.9601, Found: 272.9590.

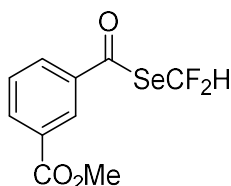

**Methyl-3-((difluoromethyl)selenyl)benzoate (3q).** Yellow gum (109 mg, 74%). Eluant: ethyl acetate/petroleum ether (1:50,  $R_f = 0.30$ ).  $^1\text{H}$  NMR (400 MHz,  $\text{CDCl}_3$ )  $\delta$  8.44 (t,  $J = 1.5$  Hz, 1H), 8.33 – 8.30 (m, 1H), 8.00 – 7.97 (m, 1H), 7.63 (t,  $J = 53.4$  Hz, 1H), 7.61 (t,  $J = 7.8$  Hz, 1H), 3.97 (s, 3H);  $^{19}\text{F}$  NMR (376 MHz,  $\text{CDCl}_3$ )  $\delta$  -95.83 (d,  $J = 53.5$  Hz, 2F);  $^{13}\text{C}$  NMR (101 MHz,  $\text{CDCl}_3$ )  $\delta$  190.7 (t,  $J = 3.0$  Hz), 165.7, 138.2 (t,  $J = 2.5$  Hz), 135.6, 131.6, 131.5, 129.6, 128.8, 120.1 (t,  $J = 284.5$  Hz), 52.8. IR (KBr):  $\nu = 2924, 1725, 1692, 1600, 1440, 1280, 1181, 1059, 983, 914, 823, 757, 722, 682, 650, 632$   $\text{cm}^{-1}$ . HRMS (ESI) for  $\text{C}_{10}\text{H}_8\text{F}_2\text{O}_3\text{SeNa}$  ( $\text{M}+\text{Na}^+$ ): Calcd: 316.9499, Found: 316.9499.

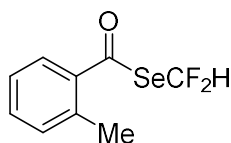

**Se-(difluoromethyl)-2-methylbenzoselenoate (3r).** Yellow oil (108 mg, 86%). Eluant: ethyl acetate/petroleum ether (1:100,  $R_f = 0.30$ ).  $^1\text{H}$  NMR (400 MHz,  $\text{CDCl}_3$ )  $\delta$  7.71 – 7.69 (m, 1H), 7.55 (t,  $J = 53.5$  Hz, 1H), 7.48 (t,  $J = 7.5$  Hz, 1H), 7.35 – 7.28 (m, 2H), 2.52 (s, 3H);  $^{19}\text{F}$  NMR (376 MHz,  $\text{CDCl}_3$ )  $\delta$  -96.71 (d,  $J = 53.6$  Hz, 2F);  $^{13}\text{C}$  NMR (101 MHz,  $\text{CDCl}_3$ )  $\delta$  192.3 (t,  $J = 2.8$  Hz), 137.6, 137.4 (t,  $J = 2.3$  Hz), 133.4, 132.3, 129.5, 126.6, 120.8 (t,  $J = 283.3$  Hz), 21.1. IR

(KBr):  $\nu = 2924, 1699, 1601, 1569, 1457, 1382, 1269, 1205, 1189, 1057, 873, 761, 715, 670, 664,$   
 $630 \text{ cm}^{-1}$ . HRMS (ESI) for  $\text{C}_9\text{H}_8\text{F}_2\text{OSeNa}$  ( $\text{M}+\text{Na}^+$ ): Calcd: 272.9601, Found: 272.9605.

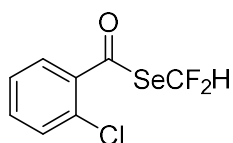

**Se-(difluoromethyl)-2-chlorobenzoselenoate (3s).** Yellow oil (98 mg, 72%). Eluant: ethyl acetate/petroleum ether (1:100,  $R_f = 0.30$ ).  $^1\text{H}$  NMR (400 MHz,  $\text{CDCl}_3$ )  $\delta$  7.69 – 7.67 (m, 1H), 7.58 (t,  $J = 53.3$  Hz, 1H), 7.51 – 7.49 (m, 2H), 7.42 – 7.38 (m, 1H);  $^{19}\text{F}$  NMR (376 MHz,  $\text{CDCl}_3$ )  $\delta$  -96.77 (d,  $J = 53.3$  Hz, 2F);  $^{13}\text{C}$  NMR (101 MHz,  $\text{CDCl}_3$ )  $\delta$  190.2 (t,  $J = 3.1$  Hz), 137.2 (t,  $J = 2.3$  Hz), 133.9, 131.7, 131.1, 129.7, 127.4, 120.3 (t,  $J = 284.7$  Hz). IR (KBr):  $\nu = 2925, 1701, 1586, 1467, 1434, 1263, 1191, 1055, 878, 760, 727, 687, 651, 625 \text{ cm}^{-1}$ . HRMS (ESI) for  $\text{C}_8\text{H}_5\text{ClF}_2\text{OSeNa}$  ( $\text{M}+\text{Na}^+$ ): Calcd: 292.9054, Found: 292.9061.

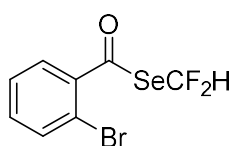

**Se-(difluoromethyl)-2-bromobenzoselenoate (3t).** Yellow oil (110 mg, 70%). Eluant: ethyl acetate/petroleum ether (1:100,  $R_f = 0.30$ ).  $^1\text{H}$  NMR (400 MHz,  $\text{CDCl}_3$ )  $\delta$  7.69 (dd,  $J = 7.7, 1.3$  Hz, 1H), 7.63 (dd,  $J = 7.4, 1.9$  Hz, 1H), 7.58 (t,  $J = 54.9$  Hz, 1H), 7.47 – 7.38 (m, 2H);  $^{19}\text{F}$  NMR (376 MHz,  $\text{CDCl}_3$ )  $\delta$  -96.45 (d,  $J = 53.3$  Hz, 2F);  $^{13}\text{C}$  NMR (101 MHz,  $\text{CDCl}_3$ )  $\delta$  191.3 (t,  $J = 3.1$  Hz), 139.4 (t,  $J = 2.4$  Hz), 135.0, 133.8, 129.7, 127.9, 120.3 (t,  $J = 285.0$  Hz), 118.6. IR (KBr):  $\nu = 2924, 1698, 1584, 1461, 1430, 1267, 1195, 1049, 875, 759, 721, 680, 642, 624 \text{ cm}^{-1}$ . HRMS (ESI) for  $\text{C}_8\text{H}_5\text{BrF}_2\text{OSeNa}$  ( $\text{M}+\text{Na}^+$ ): Calcd: 336.8549, Found: 336.8553.

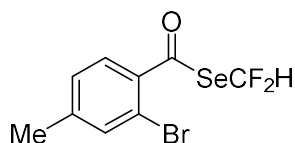

**Se-(difluoromethyl)-2-bromo-4-methylbenzoselenoate (3u).** Yellow gum (114 mg, 69%).

Eluant: ethyl acetate/petroleum ether (1:100,  $R_f = 0.30$ ).  $^1\text{H}$  NMR (400 MHz,  $\text{CDCl}_3$ )  $\delta$  7.56 (t,  $J = 53.4$  Hz, 1H), 7.55 (d,  $J = 8.0$  Hz, 1H), 7.52 (s, 1H), 7.23 (d,  $J = 8.0$  Hz, 1H), 2.39 (s, 3H);  $^{19}\text{F}$  NMR (376 MHz,  $\text{CDCl}_3$ )  $\delta$  -96.59 (d,  $J = 53.5$  Hz, 2F);  $^{13}\text{C}$  NMR (101 MHz,  $\text{CDCl}_3$ )  $\delta$  190.5 (t,  $J = 2.9$  Hz), 145.4, 136.3 (t,  $J = 2.5$  Hz), 135.7, 130.1, 128.6, 120.5 (t,  $J = 284.5$  Hz), 118.9, 21.4. IR (KBr):  $\nu = 2922, 1718, 1691, 1595, 1475, 1379, 1267, 1190, 1045, 894, 802, 686, 610\text{ cm}^{-1}$ . HRMS (ESI) for  $\text{C}_9\text{H}_7\text{BrF}_2\text{OSeNa}$  ( $\text{M}+\text{Na}^+$ ): Calcd: 350.8706, Found: 350.8711.

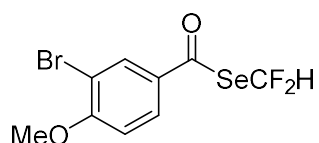

***Se*-(difluoromethyl)-3-bromo-4-methoxybenzoselenoate (3v).** Yellow solid (131 mg, 76%). Mp: 78-79 °C. Eluant: ethyl acetate/petroleum ether (1:30,  $R_f = 0.30$ ).  $^1\text{H}$  NMR (400 MHz,  $\text{CDCl}_3$ )  $\delta$  8.00 (s, 1H), 7.75 (d,  $J = 8.7$  Hz, 1H), 7.59 (t,  $J = 53.5$  Hz, 1H), 6.95 (d,  $J = 8.7$  Hz, 1H), 3.98 (s, 3H);  $^{19}\text{F}$  NMR (376 MHz,  $\text{CDCl}_3$ )  $\delta$  -95.70 (d,  $J = 53.6$  Hz, 2F);  $^{13}\text{C}$  NMR (101 MHz,  $\text{CDCl}_3$ )  $\delta$  188.1 (t,  $J = 2.8$  Hz), 161.1, 132.9, 131.5 (t,  $J = 2.4$  Hz), 129.2, 120.3 (t,  $J = 283.9$  Hz), 112.8, 111.6, 56.9. IR (KBr):  $\nu = 2921, 1714, 1681, 1591, 1557, 1493, 1399, 1281, 1259, 1188, 1068, 1015, 926, 909, 787, 688, 670, 644, 622\text{ cm}^{-1}$ . HRMS (ESI) for  $\text{C}_9\text{H}_7\text{BrF}_2\text{O}_2\text{SeNa}$  ( $\text{M}+\text{Na}^+$ ): Calcd: 366.8655, Found: 366.8657.

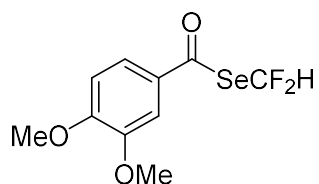

***Se*-(difluoromethyl)-3,4-dimethoxybenzoselenoate (3w).** Yellow solid (123 mg, 83%). Mp: 51-52 °C. Eluant: ethyl acetate/petroleum ether (1:30,  $R_f = 0.30$ ).  $^1\text{H}$  NMR (400 MHz,  $\text{CDCl}_3$ )  $\delta$  7.61 (t,  $J = 53.6$  Hz, 1H), 7.47 – 7.45 (m, 1H), 7.31 (d,  $J = 1.9$  Hz, 1H), 6.92 (d,  $J = 8.5$  Hz, 1H), 3.95 (s, 3H), 3.92 (s, 3H);  $^{19}\text{F}$  NMR (376 MHz,  $\text{CDCl}_3$ )  $\delta$  -95.93 (d,  $J = 53.6$  Hz, 2F);  $^{13}\text{C}$  NMR

(101 MHz, CDCl<sub>3</sub>)  $\delta$  189.0 (t,  $J = 2.7$  Hz), 154.9, 149.5, 130.7 (t,  $J = 2.5$  Hz), 123.2, 120.5 (t,  $J = 283.2$  Hz), 110.7, 109.2, 56.4, 56.2. IR (KBr):  $\nu = 2936, 1683, 1586, 1511, 1463, 1415, 1264, 1245, 1142, 1064, 1020, 975, 950, 790, 757, 691, 648$  cm<sup>-1</sup>. HRMS (ESI) for C<sub>10</sub>H<sub>11</sub>F<sub>2</sub>O<sub>3</sub>Se (M+H<sup>+</sup>): Calcd: 296.9836, Found: 296.9834.

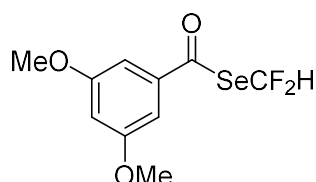

**Se-(difluoromethyl)-3,5-dimethoxybenzoselenoate (3x).** Yellow solid (120 mg, 81%). Mp: 41-42 °C. Eluant: ethyl acetate/petroleum ether (1:30, R<sub>f</sub> = 0.30). <sup>1</sup>H NMR (400 MHz, CDCl<sub>3</sub>)  $\delta$  7.59 (t,  $J = 53.5$  Hz, 1H), 6.93 – 6.92 (m, 2H), 6.71 (s, 1H), 3.83 (s, 6H); <sup>19</sup>F NMR (376 MHz, CDCl<sub>3</sub>)  $\delta$  -96.18 (d,  $J = 53.5$  Hz, 2F); <sup>13</sup>C NMR (101 MHz, CDCl<sub>3</sub>)  $\delta$  191.1 (t,  $J = 3.0$  Hz), 161.4 (2C), 139.8 (t,  $J = 2.3$  Hz), 120.3 (t,  $J = 283.8$  Hz), 107.0, 105.4 (2C), 55.8 (2C). IR (KBr):  $\nu = 2941, 1688, 1590, 1457, 1426, 1354, 1299, 1269, 1206, 1159, 1058, 980, 926, 846, 752, 688$  cm<sup>-1</sup>. HRMS (ESI) for C<sub>10</sub>H<sub>10</sub>F<sub>2</sub>O<sub>3</sub>SeNa (M+Na<sup>+</sup>): Calcd: 318.9655, Found: 318.9652.

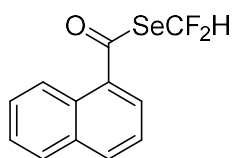

**Se-(difluoromethyl)-naphthalene-1-carboselenoate (3aa).** Yellow gum (125 mg, 87%). Eluant: ethyl acetate/petroleum ether (1:100, R<sub>f</sub> = 0.30). <sup>1</sup>H NMR (400 MHz, CDCl<sub>3</sub>)  $\delta$  8.61 (d,  $J = 8.6$  Hz, 1H), 8.08 (d,  $J = 8.2$  Hz, 1H), 8.00 (d,  $J = 7.2$  Hz, 1H), 7.90 (d,  $J = 8.1$  Hz, 1H), 7.66 (t,  $J = 53.6$  Hz, 1H), 7.65 (t,  $J = 7.1$  Hz, 1H), 7.58 (t,  $J = 7.5$  Hz, 1H), 7.53 (t,  $J = 7.8$  Hz, 1H); <sup>19</sup>F NMR (376 MHz, CDCl<sub>3</sub>)  $\delta$  -96.69 (d,  $J = 53.5$  Hz, 2F); <sup>13</sup>C NMR (101 MHz, CDCl<sub>3</sub>)  $\delta$  192.5 (t,  $J = 2.9$  Hz), 135.2 (t,  $J = 2.4$  Hz), 135.0, 134.0, 129.6, 129.2, 128.6, 128.5, 127.4, 125.0, 124.7, 120.9 (t,  $J = 283.6$  Hz). IR (KBr):  $\nu = 2923, 1695, 1507, 1267, 1221, 1171, 1047, 888, 803, 771, 745, 689, 657$

cm<sup>-1</sup>. HRMS (ESI) for C<sub>12</sub>H<sub>8</sub>F<sub>2</sub>OSeNa (M+Na<sup>+</sup>): Calcd: 308.9601, Found: 308.9605.

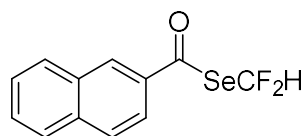

**Se-(difluoromethyl)-naphthalene-2-carboselenoate (3ab).** Yellow solid (129 mg, 90%). Mp: 41-42 °C. Eluant: ethyl acetate/petroleum ether (1:100, R<sub>f</sub> = 0.30). <sup>1</sup>H NMR (400 MHz, CDCl<sub>3</sub>) δ 8.36 (s, 1H), 8.00 (d, *J* = 8.1 Hz, 1H), 7.92 (t, *J* = 9.4 Hz, 2H), 7.84 – 7.82 (m, 1H), 7.68 (t, *J* = 54.5 Hz, 1H), 7.69 – 7.59 (m, 2H); <sup>19</sup>F NMR (376 MHz, CDCl<sub>3</sub>) δ -95.91 (d, *J* = 53.5 Hz, 2F); <sup>13</sup>C NMR (101 MHz, CDCl<sub>3</sub>) δ 191.0 (t, *J* = 2.8 Hz), 136.5, 135.1 (t, *J* = 2.4 Hz), 132.5, 130.1, 129.9, 129.6, 129.4, 128.1, 127.6, 122.7, 120.4 (t, *J* = 283.7 Hz). IR (KBr): ν = 2923, 1686, 1260, 1159, 1046, 970, 913, 814, 775, 682 cm<sup>-1</sup>. HRMS (ESI) for C<sub>12</sub>H<sub>8</sub>F<sub>2</sub>OSeNa (M+Na<sup>+</sup>): Calcd: 308.9601, Found: 308.9604.

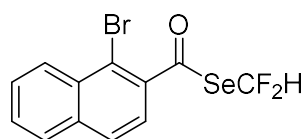

**Se-(difluoromethyl)-1-bromonaphthalene-2-carboselenoate (3ac).** Yellow solid (146 mg, 80%). Mp: 66-67 °C. Eluant: ethyl acetate/petroleum ether (1:100, R<sub>f</sub> = 0.30). <sup>1</sup>H NMR (400 MHz, CDCl<sub>3</sub>) δ 8.45 (d, *J* = 8.3 Hz, 1H), 7.91 (d, *J* = 8.5 Hz, 1H), 7.88 (d, *J* = 7.8 Hz, 1H), 7.66 (t, *J* = 53.3 Hz, 1H), 7.72 – 7.64 (m, 2H), 7.56 (d, *J* = 8.5 Hz, 1H); <sup>19</sup>F NMR (376 MHz, CDCl<sub>3</sub>) δ -96.32 (d, *J* = 53.4 Hz, 2F); <sup>13</sup>C NMR (101 MHz, CDCl<sub>3</sub>) δ 192.7 (t, *J* = 2.9 Hz), 137.8 (t, *J* = 2.5 Hz), 135.6, 132.3, 129.1, 129.0 (2C), 128.8, 128.5, 123.6, 120.3 (t, *J* = 285.3 Hz), 119.8. IR (KBr): ν = 2922, 1717, 1456, 1258, 1193, 1071, 996, 928, 766, 689 cm<sup>-1</sup>. HRMS (ESI) for C<sub>12</sub>H<sub>7</sub>BrF<sub>2</sub>OSeNa (M+Na<sup>+</sup>): Calcd: 386.8706, Found: 386.8711.

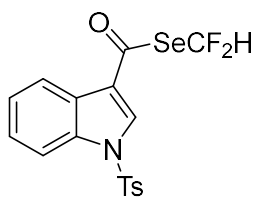

**Se-(difluoromethyl)-1-tosyl-1H-indole-3-carboselenoate (3ad).** Yellow solid (176 mg, 82%).  
 Mp: 126-127 °C. Eluant: ethyl acetate/petroleum ether (1:60,  $R_f = 0.30$ ).  $^1\text{H}$  NMR (400 MHz,  $\text{CDCl}_3$ )  $\delta$  8.26 (s, 1H), 8.08 (d,  $J = 7.5$  Hz, 1H), 7.94 (d,  $J = 8.3$  Hz, 1H), 7.85 (d,  $J = 8.3$  Hz, 2H), 7.67 (t,  $J = 53.5$  Hz, 1H), 7.38 (dt,  $J = 20.4, 7.4$  Hz, 2H), 7.30 (d,  $J = 8.0$  Hz, 2H), 2.37 (s, 3H);  $^{19}\text{F}$  NMR (376 MHz,  $\text{CDCl}_3$ )  $\delta$  -95.26 (d,  $J = 53.5$  Hz, 2F);  $^{13}\text{C}$  NMR (101 MHz,  $\text{CDCl}_3$ )  $\delta$  182.0 (t,  $J = 2.9$  Hz), 146.6, 134.9, 134.2, 132.9, 130.5 (2C), 127.5 (2C), 126.6, 126.0, 125.5, 122.4 (t,  $J = 2.8$  Hz), 122.2, 120.1 (t,  $J = 284.2$  Hz), 113.5, 21.8. IR (KBr):  $\nu = 2925, 1683, 1531, 1446, 1380, 1293, 1176, 1066, 964, 806, 749, 717, 689, 661$   $\text{cm}^{-1}$ . HRMS (ESI) for  $\text{C}_{17}\text{H}_{13}\text{F}_2\text{NO}_3\text{SSeNa}$  ( $\text{M}+\text{Na}^+$ ): Calcd: 451.9642, Found: 451.9637.

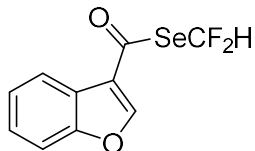

**Se-(difluoromethyl)-benzofuran-3-carboselenoate (3ae).** Yellow solid (105 mg, 76%). Mp: 51-52 °C. Eluant: ethyl acetate/petroleum ether (1:60,  $R_f = 0.30$ ).  $^1\text{H}$  NMR (400 MHz,  $\text{CDCl}_3$ )  $\delta$  8.29 (s, 1H), 8.04 – 8.02 (m, 1H), 7.71 (t,  $J = 53.5$  Hz, 1H), 7.56 – 7.54 (m, 1H), 7.44 – 7.38 (m, 2H);  $^{19}\text{F}$  NMR (376 MHz,  $\text{CDCl}_3$ )  $\delta$  -95.28 (d,  $J = 53.5$  Hz, 2F);  $^{13}\text{C}$  NMR (101 MHz,  $\text{CDCl}_3$ )  $\delta$  181.4 (t,  $J = 2.8$  Hz), 155.9, 151.9, 126.7, 125.3, 124.2 (t,  $J = 2.8$  Hz), 122.7, 122.1, 119.7 (t,  $J = 284.5$  Hz), 112.1. IR (KBr):  $\nu = 2925, 1687, 1543, 1478, 1450, 1352, 1265, 1151, 1124, 1055, 853, 806, 746, 688, 643$   $\text{cm}^{-1}$ . HRMS (ESI) for  $\text{C}_{10}\text{H}_6\text{F}_2\text{O}_2\text{SeNa}$  ( $\text{M}+\text{Na}^+$ ): Calcd: 298.9393, Found: 298.9392.



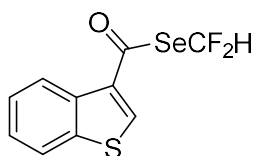

**Se-(difluoromethyl)-benzo[b]thiophene-3-carboselenoate (3af).** Yellow solid (110 mg, 75%).

Mp: 40-41 °C. Eluant: ethyl acetate/petroleum ether (1:80,  $R_f = 0.30$ ).  $^1\text{H}$  NMR (400 MHz,  $\text{CDCl}_3$ )

$\delta$  8.45 (d,  $J = 8.2$  Hz, 1H), 8.29 (s, 1H), 7.84 (d,  $J = 7.8$  Hz, 1H), 7.66 (t,  $J = 53.5$  Hz, 1H), 7.52 –

7.42 (m, 2H);  $^{19}\text{F}$  NMR (376 MHz,  $\text{CDCl}_3$ )  $\delta$  -95.59 (d,  $J = 53.6$  Hz, 2F);  $^{13}\text{C}$  NMR (101 MHz,

$\text{CDCl}_3$ )  $\delta$  182.9 (t,  $J = 3.0$  Hz), 140.1, 139.0, 135.8 (t,  $J = 2.7$  Hz), 134.7, 126.6, 126.4, 124.6,

122.7, 120.4 (t,  $J = 283.9$  Hz). IR (KBr):  $\nu = 2922, 1683, 1490, 1458, 1424, 1377, 1268, 1062,$

1044, 873, 789, 756, 730, 685  $\text{cm}^{-1}$ . HRMS (ESI) for  $\text{C}_{10}\text{H}_6\text{F}_2\text{OSSeNa}$  ( $\text{M}+\text{Na}^+$ ): Calcd: 314.9165,

Found: 314.9168.

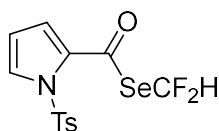

**Se-(difluoromethyl)-1-tosyl-1H-pyrrole-2-carboselenoate (3ag).** Yellow solid (150 mg, 79%).

Mp: 107-108 °C. Eluant: ethyl acetate/petroleum ether (1:60,  $R_f = 0.30$ ).  $^1\text{H}$  NMR (400 MHz,

$\text{CDCl}_3$ )  $\delta$  7.89 (d,  $J = 8.4$  Hz, 2H), 7.86 (dd,  $J = 3.0, 1.7$  Hz, 1H), 7.47 (t,  $J = 53.4$  Hz, 1H), 7.34 (d,

$J = 7.6$  Hz, 2H), 7.16 (dd,  $J = 3.9, 1.6$  Hz, 1H), 6.38 (t,  $J = 3.5$  Hz, 1H), 2.44 (s, 3H);  $^{19}\text{F}$  NMR

(376 MHz,  $\text{CDCl}_3$ )  $\delta$  -95.86 (d,  $J = 53.4$  Hz, 2F);  $^{13}\text{C}$  NMR (101 MHz,  $\text{CDCl}_3$ )  $\delta$  176.3 (t,  $J = 3.4$

Hz), 145.9, 134.9, 131.5, 131.0 (t,  $J = 3.8$  Hz), 129.8 (2C), 128.6 (2C), 126.1, 120.3 (t,  $J = 283.6$

Hz), 111.3, 21.9. IR (KBr):  $\nu = 2922, 1702, 1422, 1402, 1375, 1247, 1193, 1174, 1141, 1062,$

1016, 813, 751, 691, 667  $\text{cm}^{-1}$ . HRMS (ESI) for  $\text{C}_{13}\text{H}_{11}\text{F}_2\text{NO}_3\text{SSeNa}$  ( $\text{M}+\text{Na}^+$ ): Calcd: 401.9485,

Found: 401.9484.

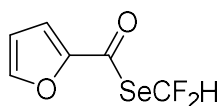

**Se-(difluoromethyl)-furan-2-carboselenoate (3ah).** Yellow gum (81 mg, 71%). Eluant: ethyl acetate/petroleum ether (1:60,  $R_f = 0.30$ ).  $^1\text{H}$  NMR (400 MHz,  $\text{CDCl}_3$ )  $\delta$  7.66 (s, 1H), 7.62 (t,  $J = 53.4$  Hz, 1H), 7.25 (d,  $J = 3.3$  Hz, 1H), 6.64 – 6.62 (m, 1H);  $^{19}\text{F}$  NMR (376 MHz,  $\text{CDCl}_3$ )  $\delta$  -96.48 (d,  $J = 53.4$  Hz, 2F);  $^{13}\text{C}$  NMR (101 MHz,  $\text{CDCl}_3$ )  $\delta$  178.2 (t,  $J = 3.3$  Hz), 151.0, 147.8, 119.5 (t,  $J = 283.3$  Hz), 116.7, 113.5. IR (KBr):  $\nu = 2920, 2851, 1688, 1563, 1461, 1253, 1073, 1014, 814, 763, 691$   $\text{cm}^{-1}$ . HRMS (ESI) for  $\text{C}_6\text{H}_4\text{F}_2\text{O}_2\text{SeNa}$  ( $\text{M}+\text{Na}^+$ ): Calcd: 248.9237, Found: 248.9238.

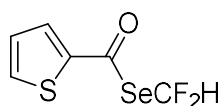

**Se-(difluoromethyl)-thiophene-2-carboselenoate (3ai).** Yellow gum (84 mg, 69%). Eluant: ethyl acetate/petroleum ether (1:80,  $R_f = 0.30$ ).  $^1\text{H}$  NMR (400 MHz,  $\text{CDCl}_3$ )  $\delta$  7.79 (d,  $J = 4.4$  Hz, 1H), 7.75 (d,  $J = 3.8$  Hz, 1H), 7.63 (t,  $J = 53.4$  Hz, 1H), 7.18 (t,  $J = 4.4$  Hz, 1H);  $^{19}\text{F}$  NMR (376 MHz,  $\text{CDCl}_3$ )  $\delta$  -95.20 (d,  $J = 53.4$  Hz, 2F);  $^{13}\text{C}$  NMR (101 MHz,  $\text{CDCl}_3$ )  $\delta$  180.8 (t,  $J = 3.1$  Hz), 142.3 (t,  $J = 3.3$  Hz), 135.4, 133.3, 128.4, 120.1 (t,  $J = 284.4$  Hz). IR (KBr):  $\nu = 2924, 1669, 1511, 1407, 1351, 1270, 1233, 1198, 1045, 867, 844, 772, 723, 691, 670, 633$   $\text{cm}^{-1}$ . HRMS (ESI) for  $\text{C}_6\text{H}_4\text{F}_2\text{OSSeNa}$  ( $\text{M}+\text{Na}^+$ ): Calcd: 264.9008, Found: 264.9007.

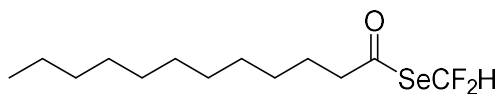

**Se-(difluoromethyl)-dodecaneselenoate (3ba).** Yellow oil (115 mg, 73%). Eluant: ethyl acetate/petroleum ether (1:100,  $R_f = 0.30$ ).  $^1\text{H}$  NMR (400 MHz,  $\text{CDCl}_3$ )  $\delta$  7.44 (t,  $J = 53.5$  Hz, 1H), 2.68 (t,  $J = 7.5$  Hz, 2H), 1.71 – 1.64 (m, 2H), 1.36 – 1.26 (m, 16H), 0.88 (t,  $J = 6.9$  Hz, 3H);  $^{19}\text{F}$  NMR (376 MHz,  $\text{CDCl}_3$ )  $\delta$  -96.27 (d,  $J = 53.5$  Hz, 2F);  $^{13}\text{C}$  NMR (101 MHz,  $\text{CDCl}_3$ )  $\delta$  198.2 (t,  $J = 1.8$  Hz), 120.1 (t,  $J = 283.4$  Hz), 49.2 (t,  $J = 2.5$  Hz), 32.0, 29.70, 29.67, 29.5 (2C), 29.3, 28.8, 25.0, 22.8, 14.2. IR (KBr):  $\nu = 2923, 2854, 1729, 1465, 1271, 1062, 722, 688$   $\text{cm}^{-1}$ . HRMS (ESI)

for  $C_{13}H_{24}F_2OSeNa$  ( $M+Na^+$ ): Calcd: 337.0853, Found: 337.0856.

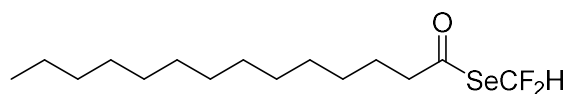

**Se-(difluoromethyl)-tetradecaneselenoate (3bb).** Yellow oil (130 mg, 76%). Eluant: ethyl acetate/petroleum ether (1:100,  $R_f = 0.30$ ).  $^1H$  NMR (400 MHz,  $CDCl_3$ )  $\delta$  7.44 (t,  $J = 53.5$  Hz, 1H), 2.68 (t,  $J = 7.5$  Hz, 2H), 1.71 – 1.64 (m, 2H), 1.36 – 1.26 (m, 20H), 0.88 (t,  $J = 6.8$  Hz, 3H);  $^{19}F$  NMR (376 MHz,  $CDCl_3$ )  $\delta$  -96.27 (d,  $J = 53.5$  Hz, 2F);  $^{13}C$  NMR (101 MHz,  $CDCl_3$ )  $\delta$  198.2 (t,  $J = 2.1$  Hz), 120.1 (t,  $J = 283.4$  Hz), 49.2 (t,  $J = 2.5$  Hz), 32.1, 29.80, 29.78, 29.75, 29.7, 29.49, 29.46, 29.3, 28.8, 25.0, 22.8, 14.3. IR (KBr):  $\nu = 2922, 2853, 1729, 1465, 1271, 1063, 722, 688$   $cm^{-1}$ . HRMS (ESI) for  $C_{15}H_{28}F_2OSeNa$  ( $M+Na^+$ ): Calcd: 365.1166, Found: 365.1161.

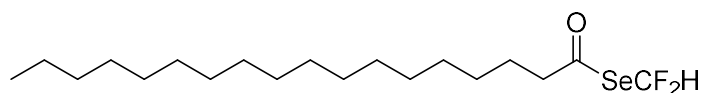

**Se-(difluoromethyl)-octadecaneselenoate (3bc).** Yellow gum (162 mg, 81%). Eluant: ethyl acetate/petroleum ether (1:100,  $R_f = 0.30$ ).  $^1H$  NMR (400 MHz,  $CDCl_3$ )  $\delta$  7.44 (t,  $J = 53.5$  Hz, 1H), 2.68 (t,  $J = 7.5$  Hz, 2H), 1.71 – 1.64 (m, 2H), 1.36 – 1.26 (m, 28H), 0.88 (t,  $J = 6.8$  Hz, 3H);  $^{19}F$  NMR (376 MHz,  $CDCl_3$ )  $\delta$  -96.26 (d,  $J = 53.5$  Hz, 2F);  $^{13}C$  NMR (101 MHz,  $CDCl_3$ )  $\delta$  198.2 (t,  $J = 1.5$  Hz), 120.1 (t,  $J = 283.4$  Hz), 49.2 (t,  $J = 2.5$  Hz), 32.1, 29.84 (3C), 29.82, 29.81, 29.80, 29.75, 29.7, 29.51, 29.47, 29.3, 28.8, 25.0, 22.8, 14.3. IR (KBr):  $\nu = 2921, 2852, 1730, 1465, 1271, 1064, 721, 688$   $cm^{-1}$ . HRMS (ESI) for  $C_{19}H_{36}F_2OSeNa$  ( $M+Na^+$ ): Calcd: 421.1792, Found: 421.1781.

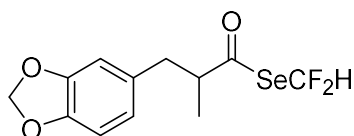

**Se-(difluoromethyl)-3-(benzo[d][1,3]dioxol-5-yl)-2-methylpropaneselenoate (3bd).** Yellow gum (118 mg, 73%). Eluant: ethyl acetate/petroleum ether (1:30,  $R_f = 0.30$ ).  $^1H$  NMR (400 MHz,

CDCl<sub>3</sub>) δ 7.41 (t, *J* = 53.6 Hz, 1H), 6.74 (d, *J* = 7.8 Hz, 1H), 6.63 (s, 1H), 6.60 (d, *J* = 7.9 Hz, 1H), 5.94 (s, 2H), 3.01 (dd, *J* = 13.7, 6.4 Hz, 1H), 2.94 – 2.85 (m, 1H), 2.61 (dd, *J* = 13.6, 7.8 Hz, 1H), 1.19 (d, *J* = 6.9 Hz, 3H); <sup>19</sup>F NMR (376 MHz, CDCl<sub>3</sub>) δ -96.19 (dd, *J* = 53.5, 30.7 Hz, 2F); <sup>13</sup>C NMR (101 MHz, CDCl<sub>3</sub>) δ 202.2 (t, *J* = 1.6 Hz), 148.0, 146.6, 131.6, 122.3, 120.0 (t, *J* = 283.7 Hz), 109.4, 108.5, 101.1, 55.2 (t, *J* = 2.3 Hz), 39.0, 16.4. IR (KBr): ν = 2925, 1719, 1505, 1490, 1444, 1248, 1191, 1070, 1040, 937, 874, 809, 690 cm<sup>-1</sup>. HRMS (ESI) for C<sub>12</sub>H<sub>12</sub>F<sub>2</sub>O<sub>3</sub>SeNa (M+Na<sup>+</sup>): Calcd: 344.9812, Found: 344.9810.

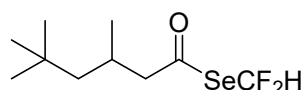

**Se-(difluoromethyl)-3,5,5-trimethylhexaneselenoate (3be).** Yellow oil (106 mg, 78%). Eluant: ethyl acetate/petroleum ether (1:100, R<sub>f</sub> = 0.30). <sup>1</sup>H NMR (400 MHz, CDCl<sub>3</sub>) δ 7.44 (t, *J* = 53.5 Hz, 1H), 2.69 (dd, *J* = 15.1, 5.7 Hz, 1H), 2.52 (dd, *J* = 15.1, 8.2 Hz, 1H), 2.17 – 2.06 (m, 1H), 1.26 (dd, *J* = 14.1, 4.2 Hz, 1H), 1.15 (dd, *J* = 14.1, 6.3 Hz, 1H), 1.02 (d, *J* = 6.7 Hz, 3H), 0.91 (s, 9H); <sup>19</sup>F NMR (376 MHz, CDCl<sub>3</sub>) δ -96.28 (d, *J* = 53.5 Hz, 2F); <sup>13</sup>C NMR (101 MHz, CDCl<sub>3</sub>) δ 197.6 (t, *J* = 1.8 Hz), 120.2 (t, *J* = 283.4 Hz), 58.4 (t, *J* = 2.4 Hz), 50.4, 31.2, 30.0 (3C), 27.6, 22.6. IR (KBr): ν = 2956, 1726, 1468, 1366, 1271, 1061, 988, 959, 687 cm<sup>-1</sup>. HRMS (ESI) for C<sub>10</sub>H<sub>18</sub>F<sub>2</sub>OSeNa (M+Na<sup>+</sup>): Calcd: 295.0383, Found: 295.0385.

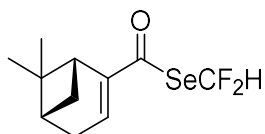

**Se-(difluoromethyl)-(1R,5S)-6,6-dimethylbicyclo[3.1.1]hept-2-ene-2-carboselenoate(3bf).**

Yellow oil (101 mg, 72%). Eluant: ethyl acetate/petroleum ether (1:100, R<sub>f</sub> = 0.30). <sup>1</sup>H NMR (400 MHz, CDCl<sub>3</sub>) δ 7.47 (t, *J* = 53.7 Hz, 1H), 6.80 – 6.78 (m, 1H), 2.79 (td, *J* = 5.6, 1.3 Hz, 1H), 2.55 – 2.41 (m, 3H), 2.20 – 2.15 (m, 1H), 1.34 (s, 3H), 1.11 (d, *J* = 9.4 Hz, 1H), 0.78 (s, 3H); <sup>19</sup>F NMR

(376 MHz, CDCl<sub>3</sub>)  $\delta$  -96.19 (d,  $J$  = 53.7 Hz, 2F); <sup>13</sup>C NMR (101 MHz, CDCl<sub>3</sub>)  $\delta$  188.7 (t,  $J$  = 2.6 Hz), 149.9 (t,  $J$  = 2.2 Hz), 140.5, 120.5 (t,  $J$  = 282.7 Hz), 41.8, 40.5, 38.1, 32.8, 31.3, 25.8, 21.0. IR (KBr):  $\nu$  = 2928, 1682, 1615, 1470, 1418, 1369, 1268, 1205, 1168, 1127, 1041, 916, 806, 723, 689, 621 cm<sup>-1</sup>. HRMS (ESI) for C<sub>11</sub>H<sub>14</sub>F<sub>2</sub>OSeNa (M+Na<sup>+</sup>): Calcd: 303.0070, Found: 303.0074.

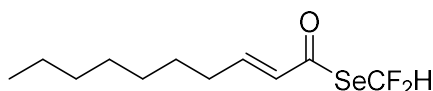

**Se-(difluoromethyl)-(E)-dec-2-eneselenoate (3bg).** Yellow oil (98 mg, 69%). Eluant: ethyl acetate/petroleum ether (1:100, R<sub>f</sub> = 0.30). <sup>1</sup>H NMR (400 MHz, CDCl<sub>3</sub>) 7.49 (t,  $J$  = 53.6 Hz, 1H), 6.93 – 6.86 (m, 1H), 6.08 (d,  $J$  = 15.4 Hz, 1H), 2.23 (q,  $J$  = 7.2 Hz, 2H), 1.50 – 1.46 (m, 2H), 1.30 – 1.26 (m, 8H), 0.88 (t,  $J$  = 6.3 Hz, 3H); <sup>19</sup>F NMR (376 MHz, CDCl<sub>3</sub>)  $\delta$  -96.07 (d,  $J$  = 53.6 Hz, 2F); <sup>13</sup>C NMR (101 MHz, CDCl<sub>3</sub>)  $\delta$  188.5 (t,  $J$  = 2.5 Hz), 150.7, 130.6 (t,  $J$  = 2.7 Hz), 120.2 (t,  $J$  = 283.1 Hz), 32.6, 31.8, 29.2, 29.1, 27.8, 22.7, 14.2. IR (KBr):  $\nu$  = 2926, 2856, 1694, 1625, 1465, 1269, 1061, 778, 690 cm<sup>-1</sup>. HRMS (ESI) for C<sub>11</sub>H<sub>18</sub>F<sub>2</sub>OSeNa (M+Na<sup>+</sup>): Calcd: 307.0383, Found: 307.0381.

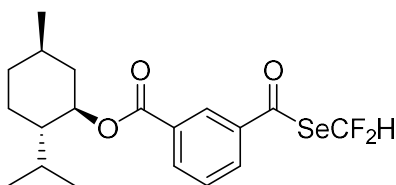

**(1R,2S,5R)-2-isopropyl-5-methylcyclohexyl-3-(((difluoromethyl)selenanyl)carbonyl)benzoate (3ca).** Yellow oil (94 mg, 45%). Eluant: ethyl acetate/petroleum ether (1:60, R<sub>f</sub> = 0.30). <sup>1</sup>H NMR (400 MHz, CDCl<sub>3</sub>)  $\delta$  8.44 (s, 1H), 8.32 (d,  $J$  = 7.7 Hz, 1H), 7.98 (d,  $J$  = 7.7 Hz, 1H), 7.63 (t,  $J$  = 53.5 Hz, 1H), 7.60 (t,  $J$  = 7.8 Hz, 1H), 4.97 (td,  $J$  = 10.7, 4.0 Hz, 1H), 2.12 (d,  $J$  = 11.8 Hz, 1H), 1.95 – 1.89 (m, 1H), 1.75 (d,  $J$  = 11.9 Hz, 2H), 1.57 (s, 2H), 1.18 – 1.09 (m, 2H), 0.95 – 0.92 (m, 7H), 0.80 (d,  $J$  = 6.9 Hz, 3H); <sup>19</sup>F NMR (376 MHz, CDCl<sub>3</sub>)  $\delta$  -95.78 (d,  $J$  = 53.7 Hz, 2F); <sup>13</sup>C NMR (101 MHz, CDCl<sub>3</sub>)  $\delta$  190.8 (t,  $J$  = 2.9 Hz), 164.7, 138.2 (t,  $J$  = 2.5 Hz), 135.6, 132.3, 131.3,

129.6, 128.8, 120.1 (t,  $J = 284.4$  Hz), 76.0, 47.3, 41.0, 34.4, 31.6, 26.8, 23.8, 22.2, 20.9, 16.7. IR (KBr):  $\nu = 2922, 1721, 1702, 1646, 1600, 1458, 1377, 1298, 1278, 1188, 1074, 951, 932, 884, 845, 757, 687$   $\text{cm}^{-1}$ . HRMS (ESI) for  $\text{C}_{19}\text{H}_{24}\text{F}_2\text{O}_3\text{SeNa}$  ( $\text{M}+\text{Na}^+$ ): Calcd: 441.0751, Found: 441.0751.

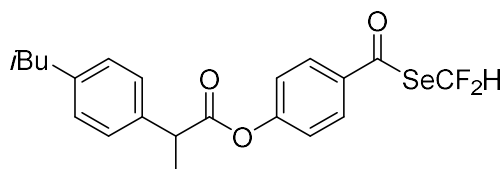

**4-(((difluoromethyl)selanyl)carbonyl)phenyl-2-(4-isobutylphenyl)propanoate (3cb).** Yellow oil (130 mg, 59%). Eluant: ethyl acetate/petroleum ether (1:60,  $R_f = 0.30$ ).  $^1\text{H}$  NMR (400 MHz,  $\text{CDCl}_3$ )  $\delta$  7.82 – 7.78 (m, 2H), 7.60 (t,  $J = 53.5$  Hz, 1H), 7.29 (d,  $J = 8.1$  Hz, 2H), 7.17 (s, 2H), 7.15 (d,  $J = 1.7$  Hz, 2H), 3.96 (q,  $J = 7.1$  Hz, 1H), 2.48 (d,  $J = 7.2$  Hz, 2H), 1.92 – 1.82 (m, 1H), 1.62 (d,  $J = 7.1$  Hz, 3H), 0.91 (d,  $J = 6.6$  Hz, 6H);  $^{19}\text{F}$  NMR (376 MHz,  $\text{CDCl}_3$ )  $\delta$  -95.80 (d,  $J = 53.8$  Hz, 2F);  $^{13}\text{C}$  NMR (101 MHz,  $\text{CDCl}_3$ )  $\delta$  189.8 (t,  $J = 2.9$  Hz), 172.5, 156.0, 141.3, 136.8, 135.2 (t,  $J = 2.5$  Hz), 129.8 (2C), 129.2 (2C), 127.3 (2C), 122.5 (2C), 120.2 (t,  $J = 284.0$  Hz), 45.4, 45.2, 30.3, 22.5 (2C), 18.5. IR (KBr):  $\nu = 2955, 1762, 1696, 1598, 1500, 1463, 1205, 1163, 1132, 1068, 883, 847, 690, 620$   $\text{cm}^{-1}$ . HRMS (ESI) for  $\text{C}_{21}\text{H}_{22}\text{F}_2\text{O}_3\text{SeNa}$  ( $\text{M}+\text{Na}^+$ ): Calcd: 463.0594, Found: 463.0615.

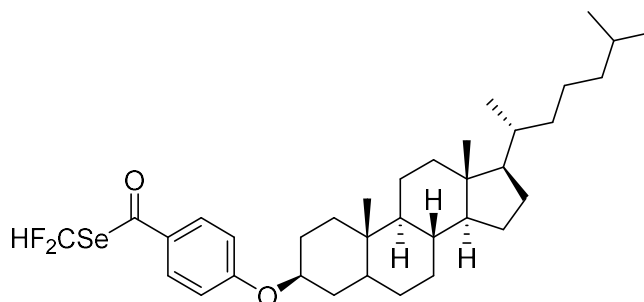

**Se-(difluoromethyl)-4-(((3S,8R,9S,10S,13R,14S,17R)-10,13-dimethyl-17-((R)-6-methylheptan-2-yl)hexadecahydro-1H-cyclopenta[a]phenanthren-3-yl)oxy)benzeneseleno-ate (3cc).** Yellow oil (128 mg, 41%). Eluant: ethyl acetate/petroleum ether (1:80,  $R_f = 0.30$ ).  $^1\text{H}$  NMR (400 MHz,

CDCl<sub>3</sub>) δ 7.75 (d, *J* = 8.8 Hz, 2H), 7.60 (d, *J* = 53.6 Hz, 1H), 6.94 (d, *J* = 8.7 Hz, 2H), 4.65 (s, 1H), 1.99 – 1.48 (m, 12H), 1.35 – 0.83 (m, 31H), 0.65 (s, 3H); <sup>19</sup>F NMR (376 MHz, CDCl<sub>3</sub>) δ -95.87 (d, *J* = 53.9 Hz, 2F); <sup>13</sup>C NMR (101 MHz, CDCl<sub>3</sub>) δ 188.7 (t, *J* = 2.7 Hz), 163.7, 130.3 (2C), 129.9 (t, *J* = 2.8 Hz), 120.6 (t, *J* = 282.3 Hz), 115.9 (2C), 73.1, 56.7, 56.4, 54.3, 42.7, 40.1, 39.74, 39.66, 36.3, 36.0, 35.9, 35.6, 32.71, 32.66, 32.1, 28.6, 28.4, 28.2, 25.8, 24.3, 24.0, 23.0, 22.7, 21.0, 18.8, 12.2, 11.6. IR (KBr): ν = 2924, 1683, 1597, 1572, 1505, 1458, 1377, 1306, 1263, 1212, 1161, 1069, 879, 837, 690, 622 cm<sup>-1</sup>. HRMS (ESI) for C<sub>35</sub>H<sub>52</sub>F<sub>2</sub>O<sub>2</sub>SeNa (M+Na<sup>+</sup>): Calcd: 645.2993, Found: 645.2994.

#### 4. Procedures for radical mechanism experiment

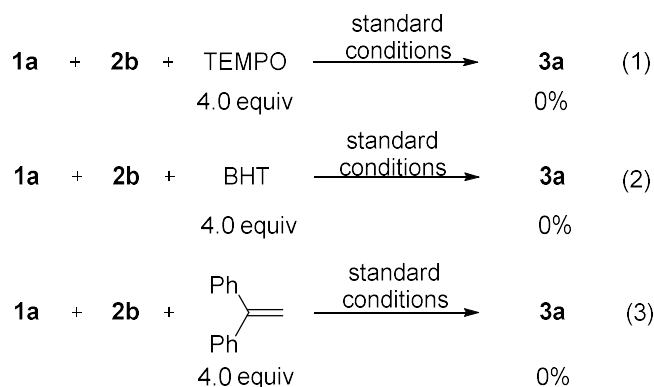

A 5 mL round bottomed flask equipped with a stirring bar was charged with **1a** (18 mg, 0.15 mmol, 1.5 equiv), **2b** (22 mg, 0.1 mmol, 1.0 equiv), AIBN (32.8 mg, 0.2 mmol, 2.0 equiv) and DCE (1.0 mL) followed by sequential addition of three radical-trapping reagents, TEMPO (62.5 mg, 0.4 mmol, 4.0 equiv), BHT (88 mg, 0.4 mmol, 4.0 equiv) or 1,1-diphenylethylene (72 mg, 0.4 mmol, 4.0 equiv), respectively. The reaction was allowed to stir at 50 °C under an argon atmosphere. After 24 h, no product **3a** was detected (eq. 1, 2 and 3).

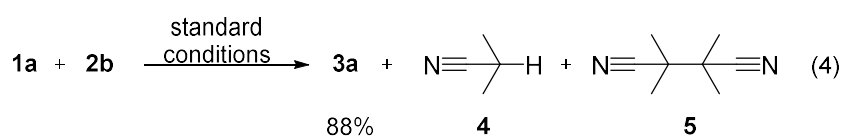

A 5 mL round bottomed flask equipped with a stirring bar was charged with **1a** (18 mg, 0.15 mmol, 1.5 equiv), **2b** (22 mg, 0.1 mmol, 1.0 equiv), AIBN (32.8 mg, 0.2 mmol, 2.0 equiv), and DCE (1.0 mL). The reaction was allowed to stir at 50 °C under an argon atmosphere. After 24 h, not only **3a** is generated, but isobutyronitrile **4** and 2,2,3,3-tetramethylsuccinonitrile **5** were detected in the reaction mixture by ESI-HRMS analysis (eq. 4). **4**: HRMS (ESI) for C<sub>4</sub>H<sub>7</sub>NNa (M+Na<sup>+</sup>): Calcd: 92.0471, Found: 92.0470; **5**: HRMS (ESI) for C<sub>8</sub>H<sub>13</sub>N<sub>2</sub> (M+H<sup>+</sup>): Calcd: 137.1073, Found: 137.1073.

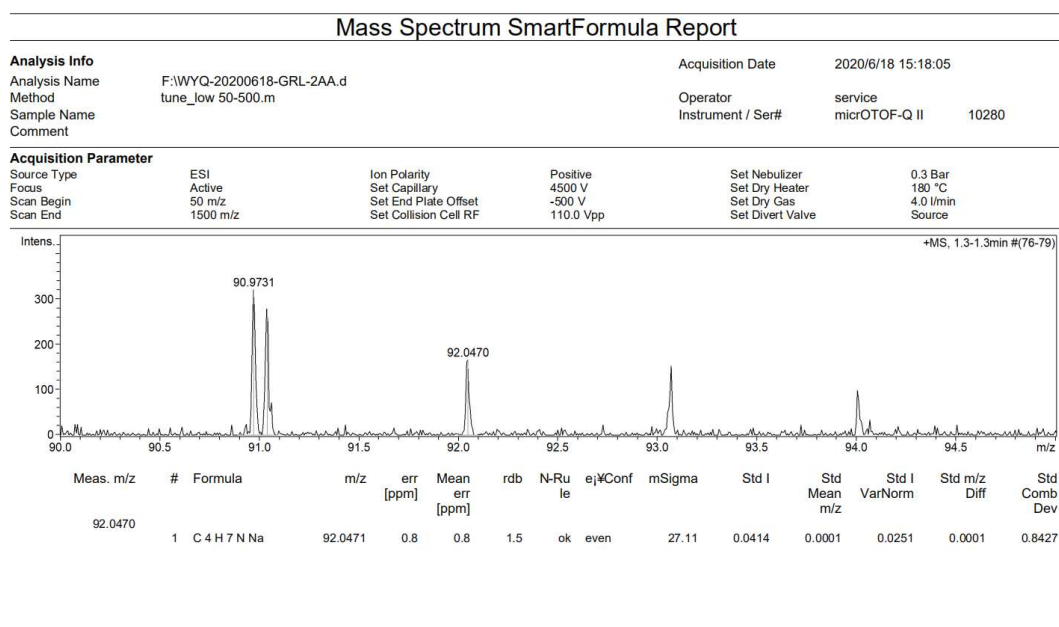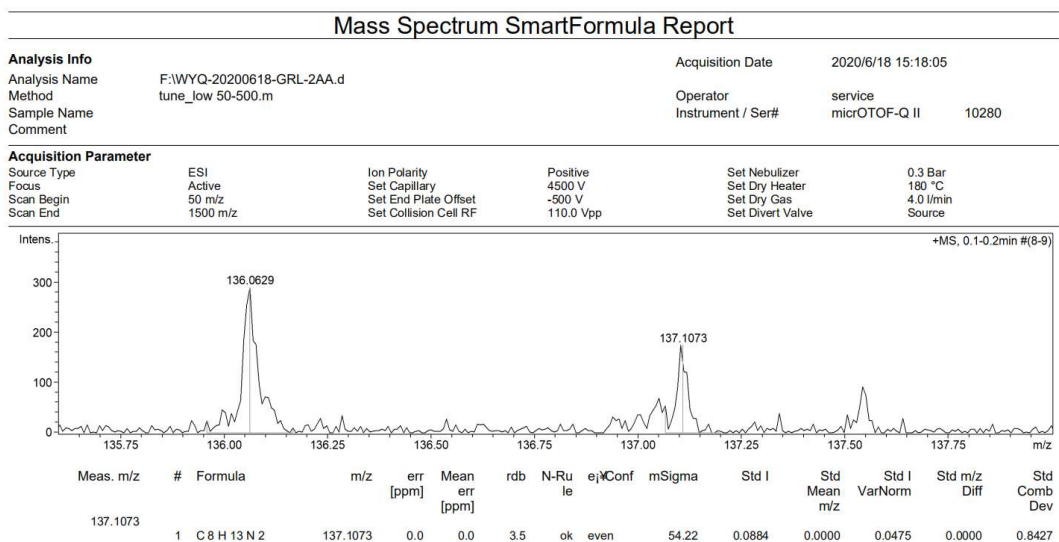



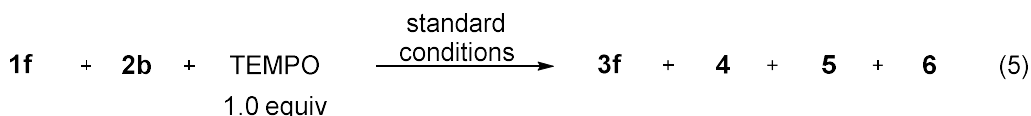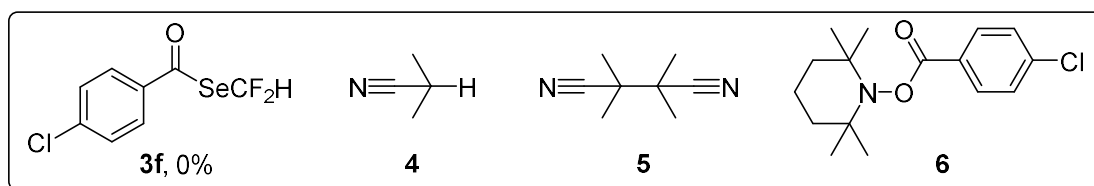

A 5 mL round bottomed flask equipped with a stirring bar was charged with **1f** (21 mg, 0.15 mmol, 1.5 equiv), **2b** (22 mg, 0.1 mmol, 1.0 equiv), AIBN (32.8 mg, 0.2 mmol, 2.0 equiv), TEMPO (15.6 mg, 0.1 mmol, 1.0 equiv), and DCE (1.0 mL). The reaction was allowed to stir at 50 °C under an argon atmosphere. After 24 h, no product **3f** was detected, while the isobutyronitrile **4**, 2,2,3,3-tetramethylsuccinonitrile **5** and 2,2,6,6-tetramethylpiperidin-1-yl 4-chlorobenzoate **6** were detected in the reaction mixture by ESI-HRMS analysis (eq. 5). **4**: HRMS (ESI) for C<sub>4</sub>H<sub>7</sub>NNa (M+Na<sup>+</sup>): Calcd: 92.0471, Found: 92.0469; **5**: HRMS (ESI) for C<sub>8</sub>H<sub>13</sub>N<sub>2</sub> (M+H<sup>+</sup>): Calcd: 137.1073, Found: 137.1070; **6**: HRMS (ESI) for C<sub>16</sub>H<sub>22</sub>ClNO<sub>2</sub>Na (M+Na<sup>+</sup>): Calcd: 318.1231, Found: 318.1232.

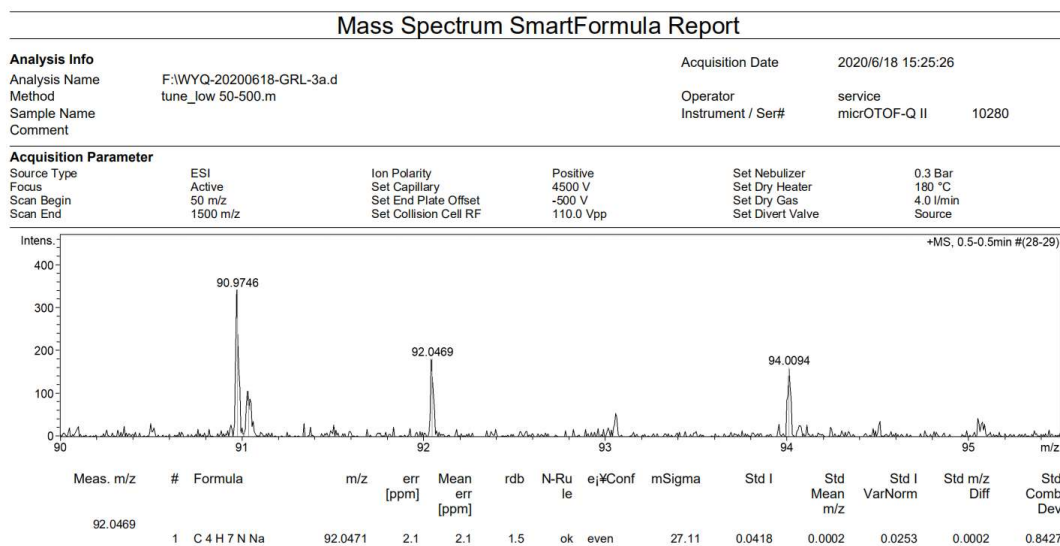

### Mass Spectrum SmartFormula Report

|                      |                     |                   |                     |  |
|----------------------|---------------------|-------------------|---------------------|--|
| <b>Analysis Info</b> |                     | Acquisition Date  | 2020/6/3 11:10:44   |  |
| Analysis Name        | F:\wyq_gri-0603-1.d | Operator          | service             |  |
| Method               | tune_low 50-500.m   | Instrument / Ser# | micrOTOF-Q II 10280 |  |
| Sample Name          |                     |                   |                     |  |
| Comment              |                     |                   |                     |  |

|                              |          |                       |           |                  |           |
|------------------------------|----------|-----------------------|-----------|------------------|-----------|
| <b>Acquisition Parameter</b> |          |                       |           |                  |           |
| Source Type                  | ESI      | Ion Polarity          | Positive  | Set Nebulizer    | 0.3 Bar   |
| Focus                        | Active   | Set Capillary         | 5000 V    | Set Dry Heater   | 180 °C    |
| Scan Begin                   | 50 m/z   | Set End Plate Offset  | -500 V    | Set Dry Gas      | 4.0 l/min |
| Scan End                     | 1500 m/z | Set Collision Cell RF | 110.0 Vpp | Set Divert Valve | Source    |

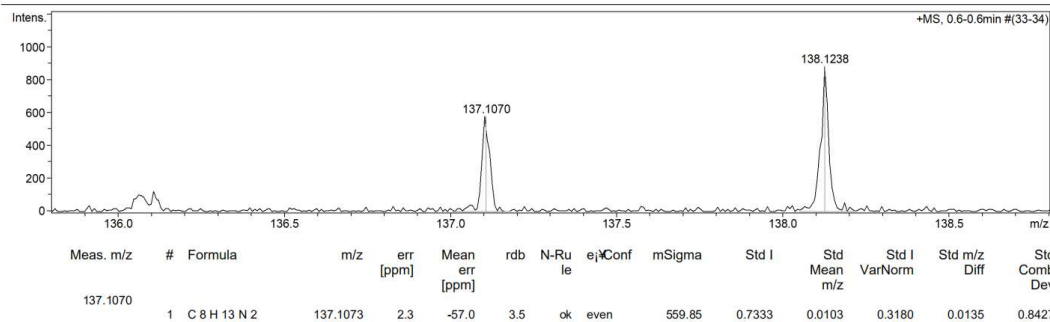

### Mass Spectrum SmartFormula Report

|                      |                     |                   |                     |  |
|----------------------|---------------------|-------------------|---------------------|--|
| <b>Analysis Info</b> |                     | Acquisition Date  | 2020/6/3 11:10:44   |  |
| Analysis Name        | F:\wyq_gri-0603-1.d | Operator          | service             |  |
| Method               | tune_low 50-500.m   | Instrument / Ser# | micrOTOF-Q II 10280 |  |
| Sample Name          |                     |                   |                     |  |
| Comment              |                     |                   |                     |  |

|                              |          |                       |           |                  |           |
|------------------------------|----------|-----------------------|-----------|------------------|-----------|
| <b>Acquisition Parameter</b> |          |                       |           |                  |           |
| Source Type                  | ESI      | Ion Polarity          | Positive  | Set Nebulizer    | 0.3 Bar   |
| Focus                        | Active   | Set Capillary         | 5000 V    | Set Dry Heater   | 180 °C    |
| Scan Begin                   | 50 m/z   | Set End Plate Offset  | -500 V    | Set Dry Gas      | 4.0 l/min |
| Scan End                     | 1500 m/z | Set Collision Cell RF | 110.0 Vpp | Set Divert Valve | Source    |

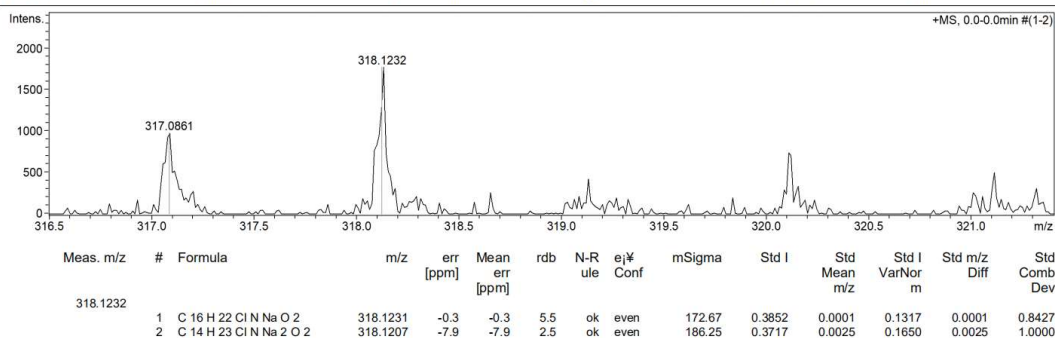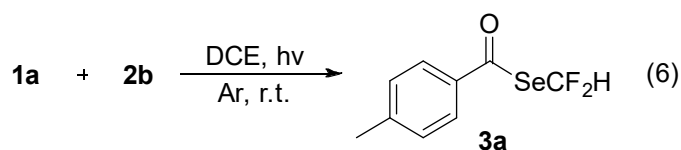

no hv, 12 h: 0%;  
 23 W white LED bulb, 24 h: 13%;  
 10 W blue LED bulb, 24 h: 25%

A 5 mL round bottomed flask was charged with **1a** (18 mg, 0.15 mmol, 1.5 equiv), **2b** (22 mg, 0.1 mmol, 1.0 equiv), and DCE (0.5 mL). The reaction was stirred under an argon atmosphere at room temperature. After 12 h, it was found that no product **3a** was detected (eq. 6).

A 5 mL round bottomed flask was charged with **1a** (18 mg, 0.15 mmol, 1.5 equiv), **2b** (22 mg, 0.1 mmol, 1.0 equiv), and DCE (0.5 mL). The reaction was stirred with 23 W white LED bulb irradiation under an argon atmosphere at room temperature. After 24 h, the solvent was evaporated in vacuo. The residue was purified by flash chromatography on silica gel to afford **3a** in 13% yield.

A 5 mL round bottomed flask was charged with **1a** (18 mg, 0.15 mmol, 1.5 equiv), **2b** (22 mg, 0.1 mmol, 1.0 equiv), and DCE (0.5 mL). The reaction was stirred with 10 W blue LED bulb irradiation under an argon atmosphere at room temperature. After 24 h, the solvent was evaporated in vacuo. The residue was purified by flash chromatography on silica gel to afford **3a** in 25% yield.

## 5. References

- (1) Q. Glenadel, E. Ismalaj and T. Billard, *J. Org. Chem.*, 2016, **81**, 8268.
- (2) K. Lu, Q. Li, X. Xi, T. Zhou, X. Zhao, *J. Org. Chem.*, 2020, **85**, 1224.
- (3) W. Zi, H. Wu, F. D. Toste, *J. Am. Chem. Soc.*, 2015, **137**, 3225.
- (4) J. Waser, B. Gaspar, H. Nambu, E. M. Carreira, *J. Am. Chem. Soc.*, 2006, **128**, 11693.
- (5) M. Zhang, X. A. Yuan, C. Zhu, J. Xie, *Angew. Chem., Int. Ed.*, 2019, **58**, 312.
- (6) Y. Zhang, P. Ji, W. Hu, Y. Wei, H. Huang, W. Wang, *Chem.–Eur. J.*, 2019, **25**, 8225.
- (7) S. Mukherjee, R. A. Garza-Sanchez, A. Tlahuext-Aca, F. Glorius, *Angew. Chem., Int. Ed.*, 2017, **56**, 14723.

6.  $^1\text{H}$ ,  $^{19}\text{F}$ ,  $^{13}\text{C}$  NMR spectra of compounds 2b – 3cc

$^1\text{H}$  NMR spectra of compound 2b

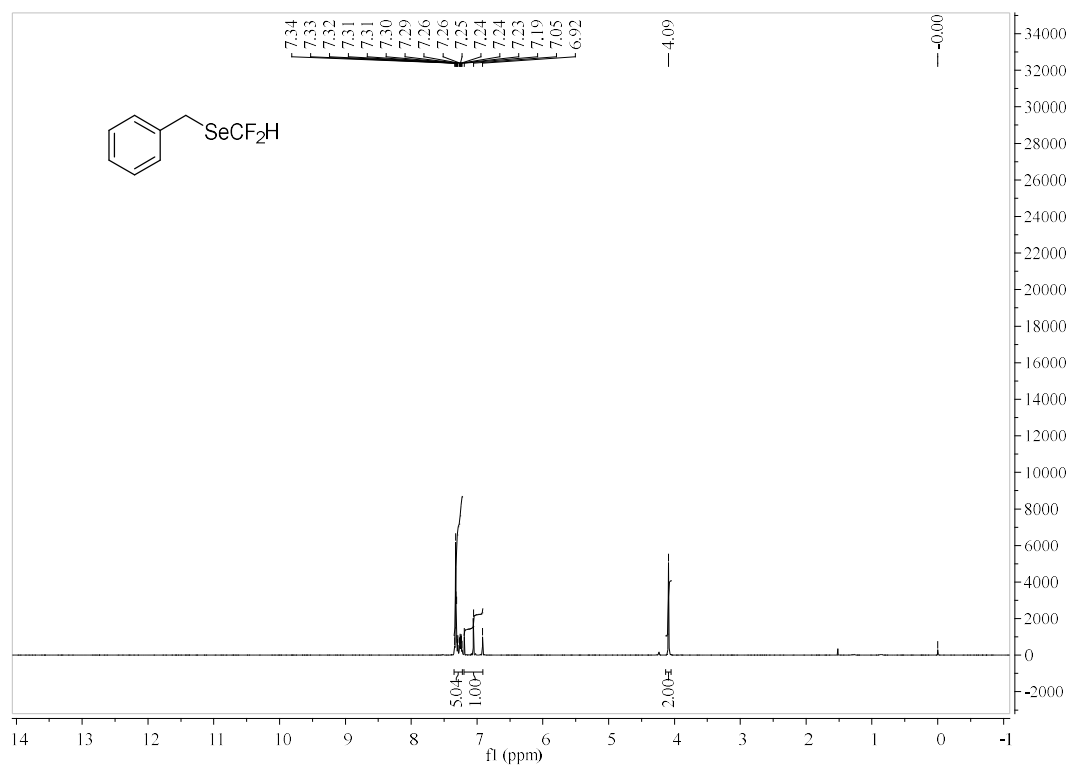

$^{19}\text{F}$  NMR spectra of compound 2b

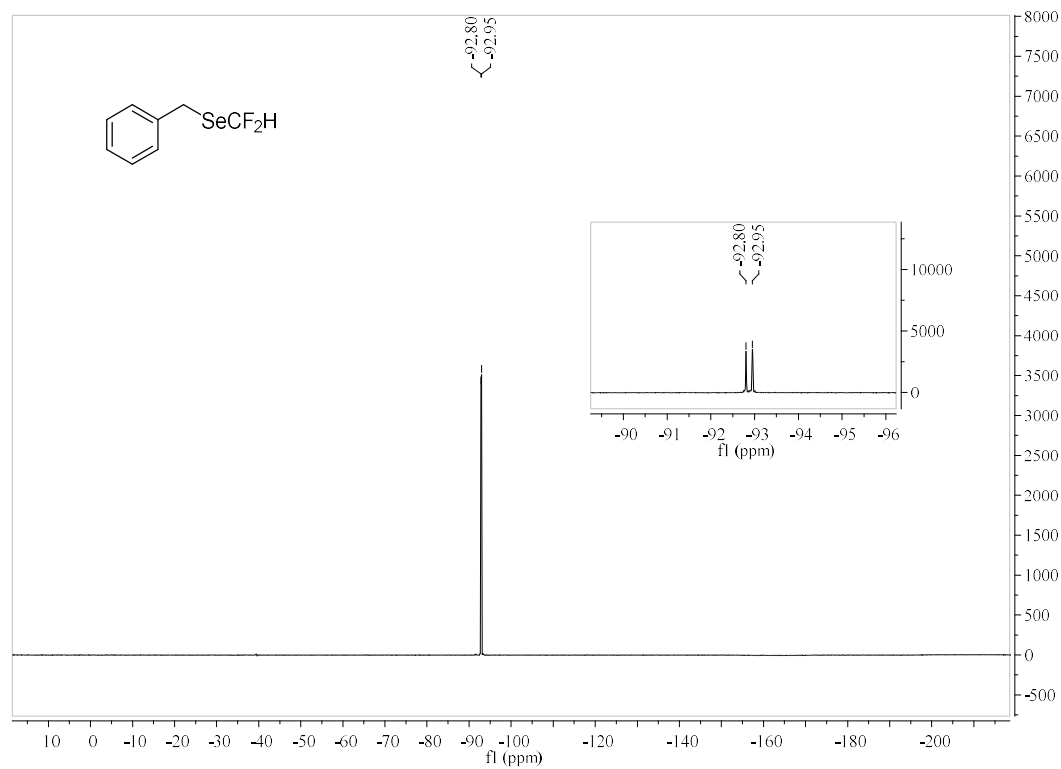

### $^{13}\text{C}$ NMR spectra of compound **2b**

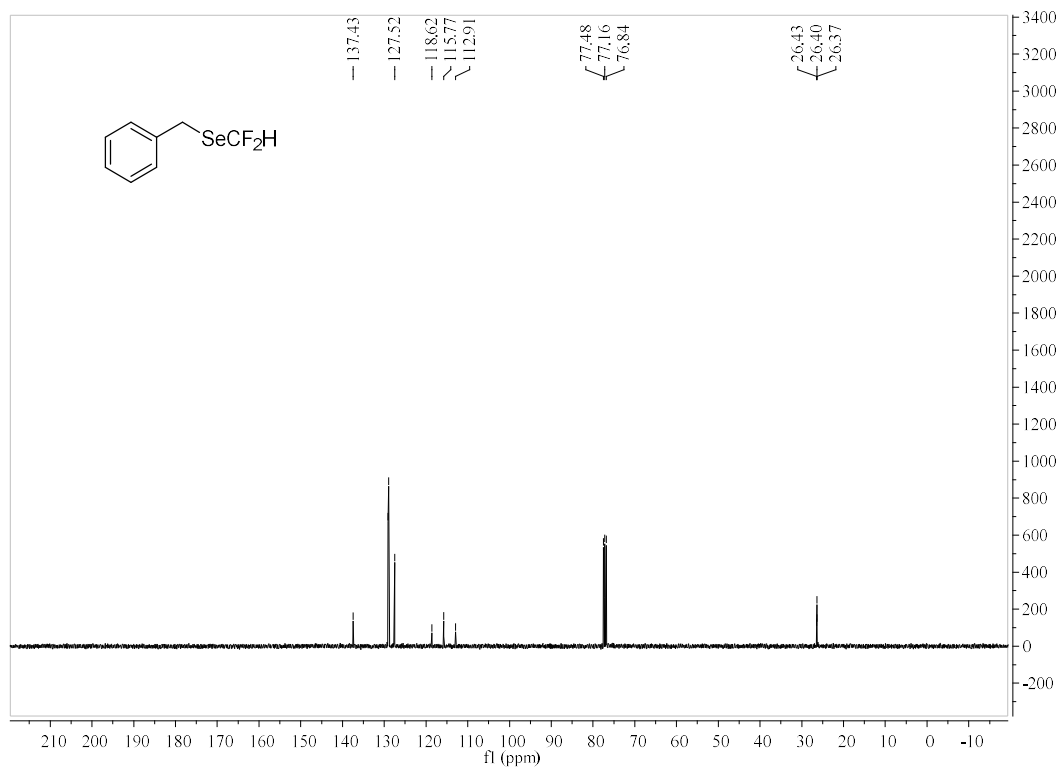

### $^1\text{H}$ NMR spectra of compound **2c**

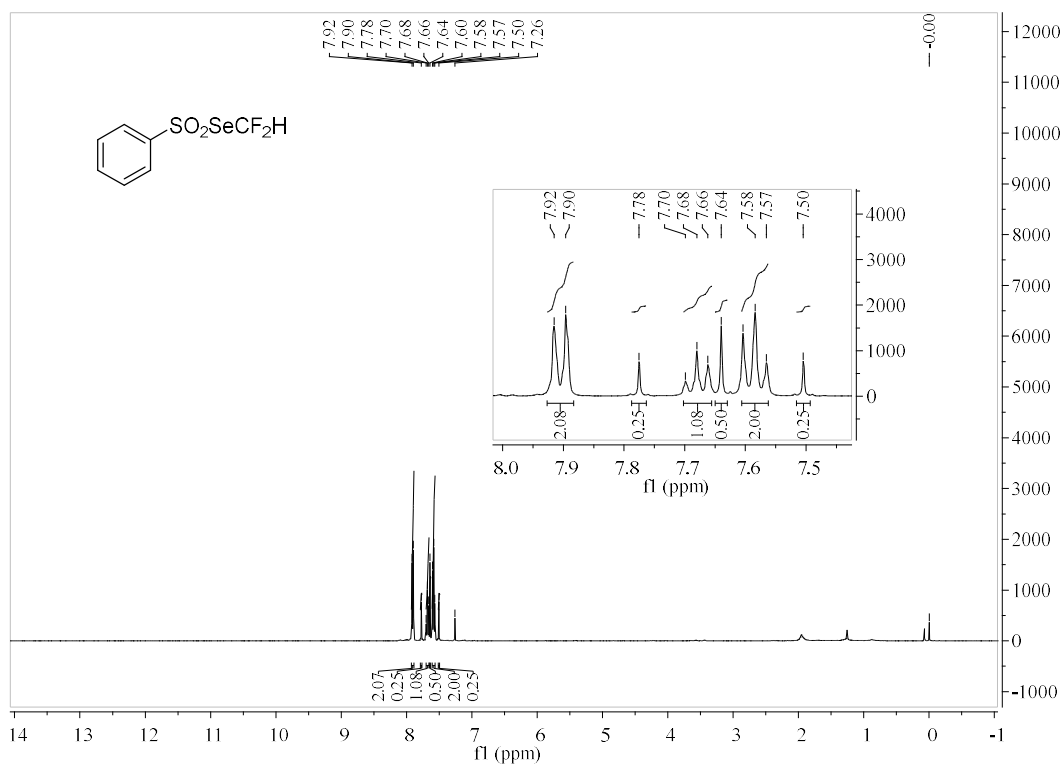

<sup>19</sup>F NMR spectra of compound **2c**

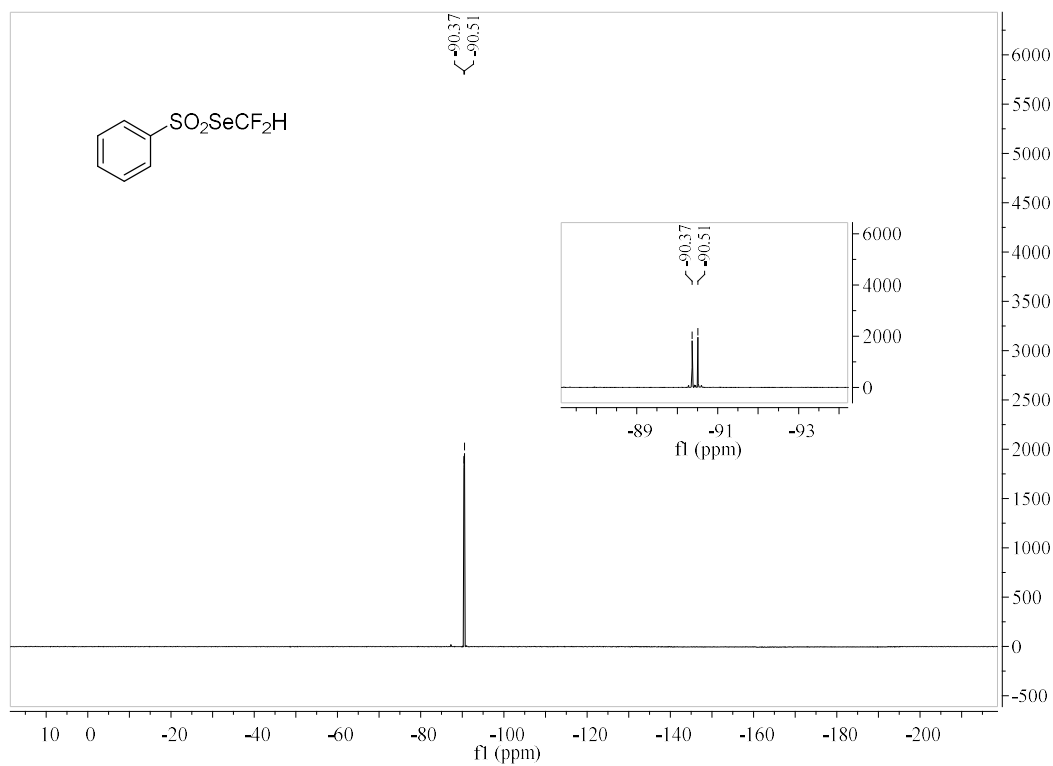

<sup>13</sup>C NMR spectra of compound **2c**

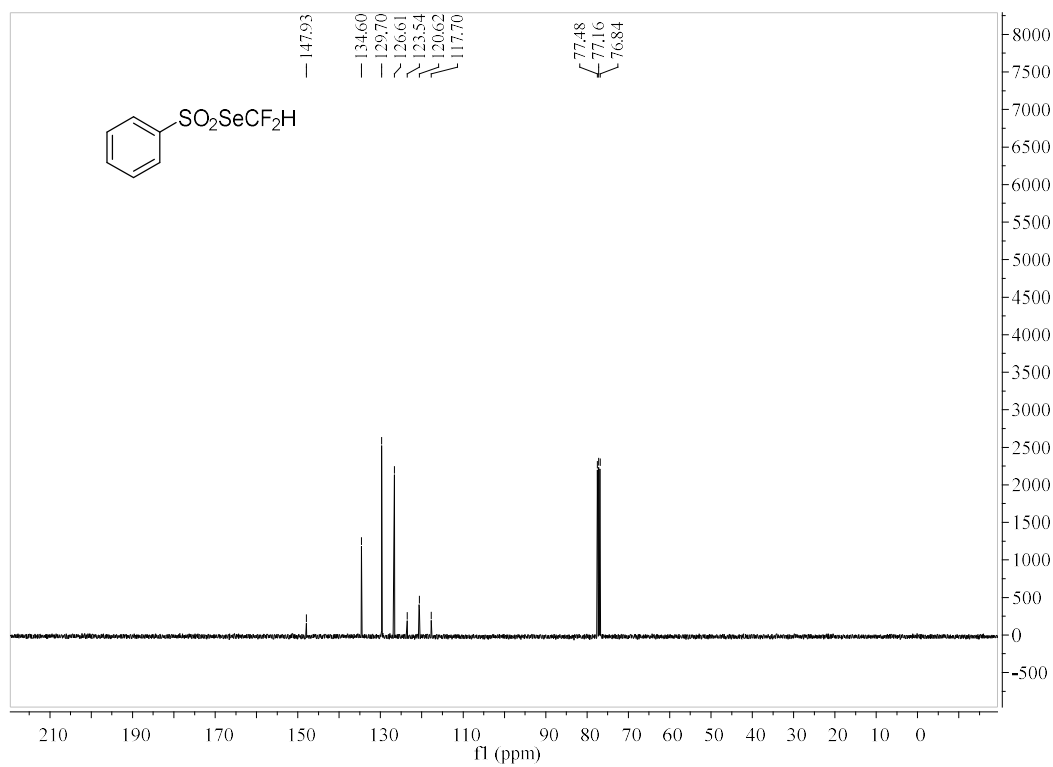

### <sup>1</sup>H NMR spectra of compound 3a

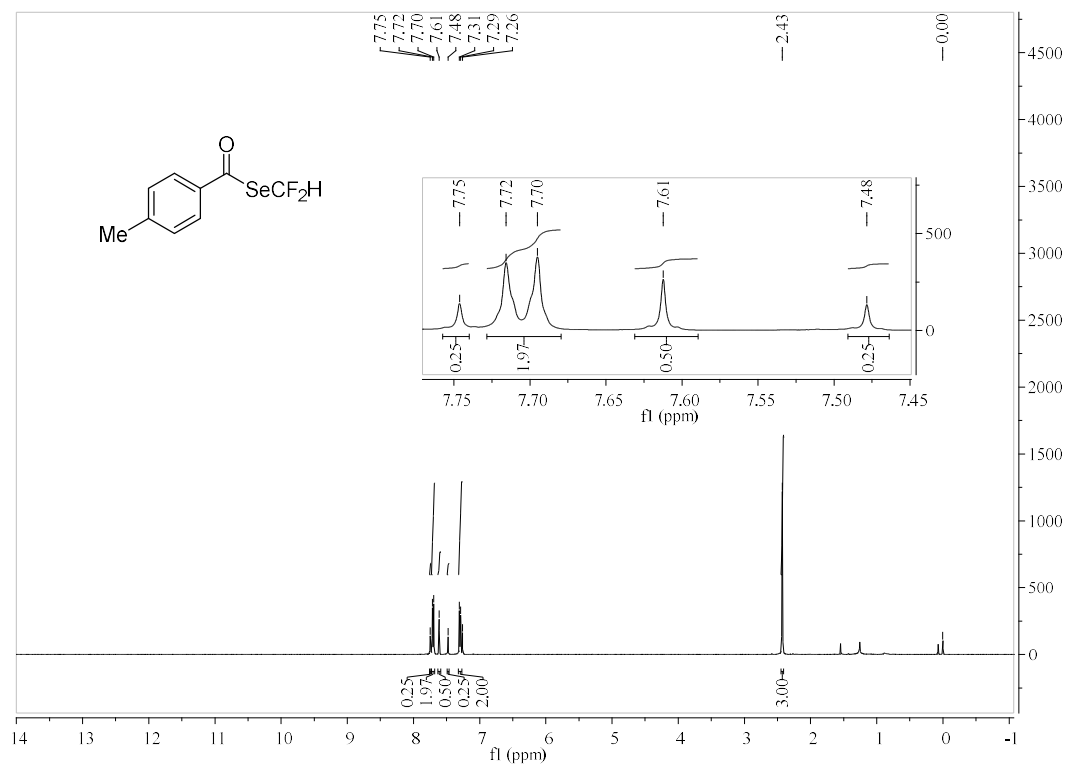

### <sup>19</sup>F NMR spectra of compound 3a

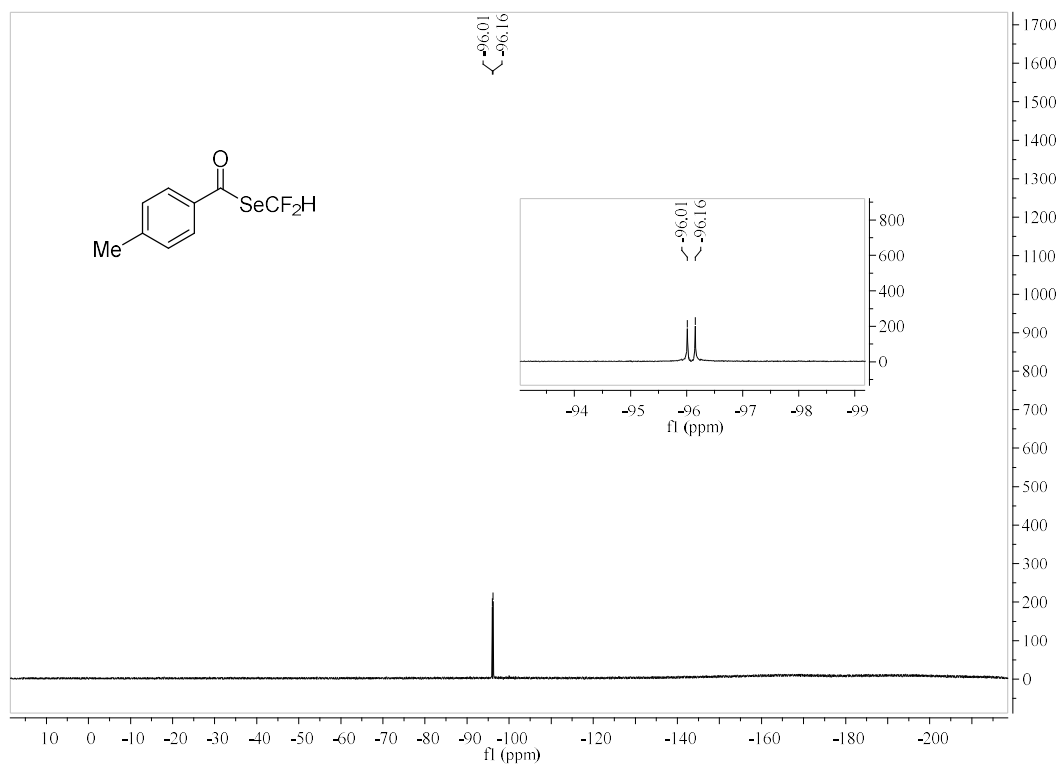

<sup>13</sup>C NMR spectra of compound **3a**

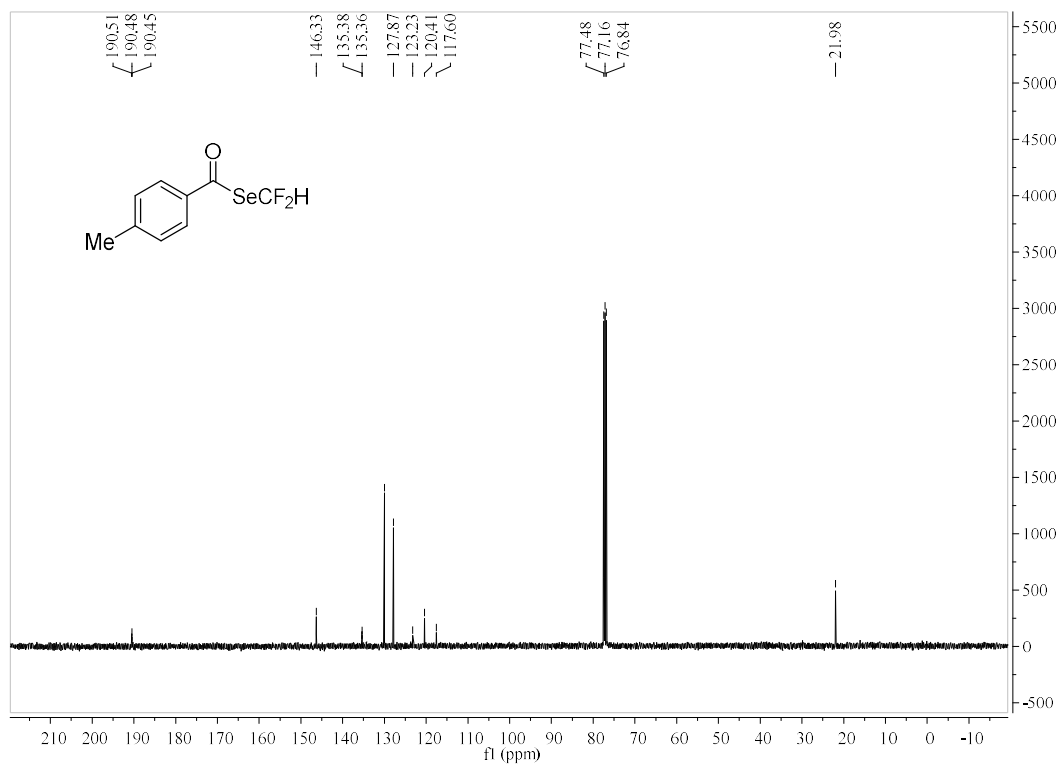

<sup>1</sup>H NMR spectra of compound **3b**

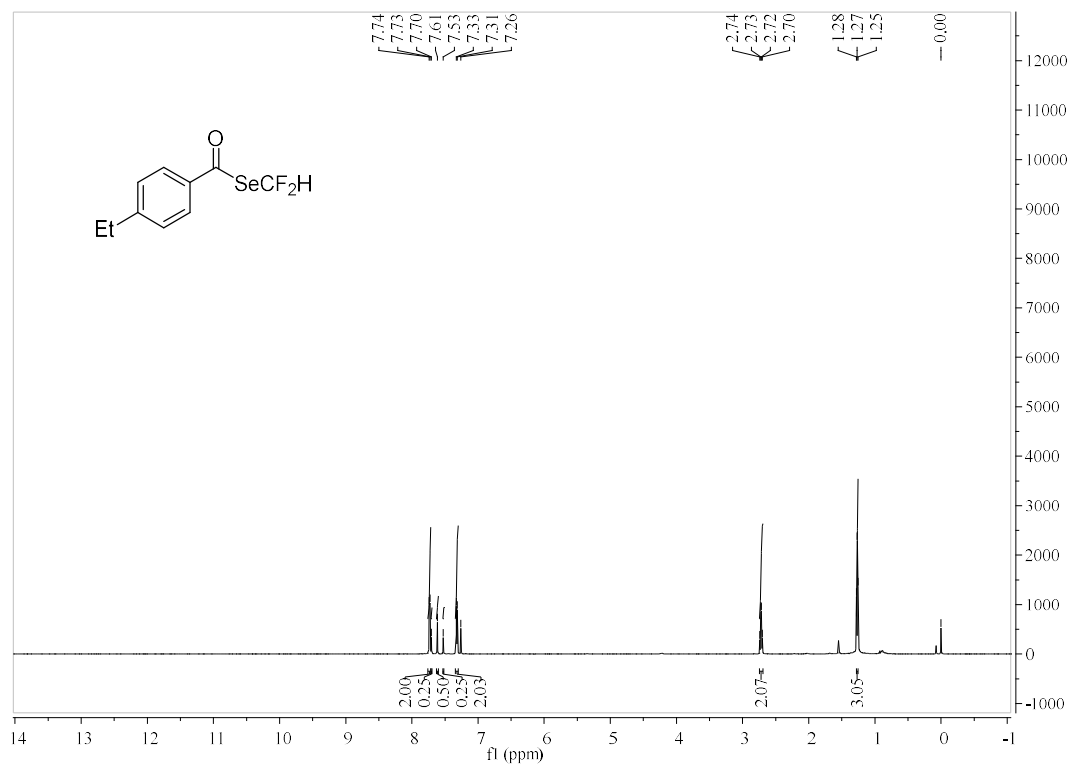



### <sup>19</sup>F NMR spectra of compound **3b**

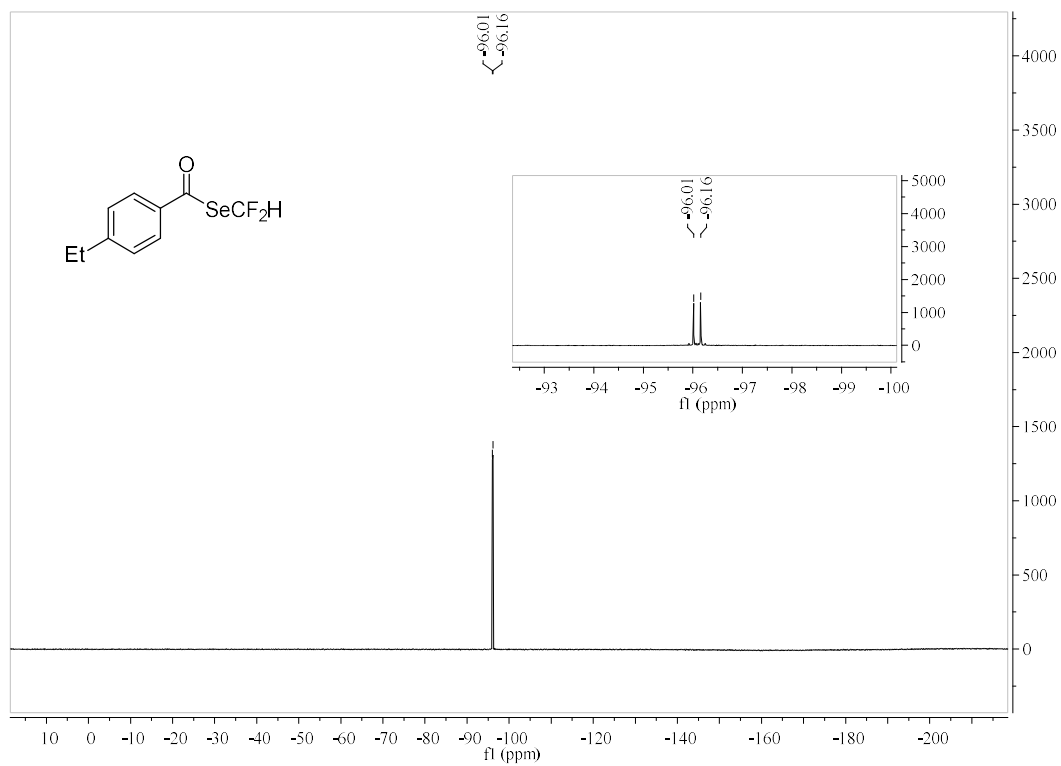

### <sup>13</sup>C NMR spectra of compound **3b**

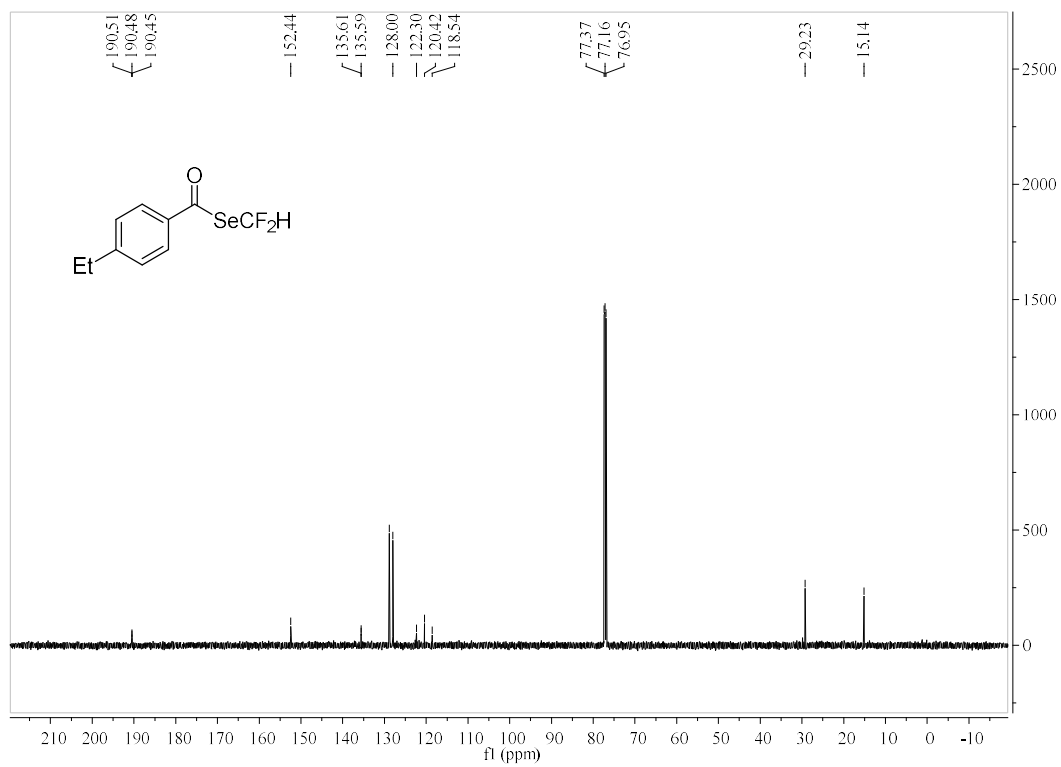

### <sup>1</sup>H NMR spectra of compound 3c

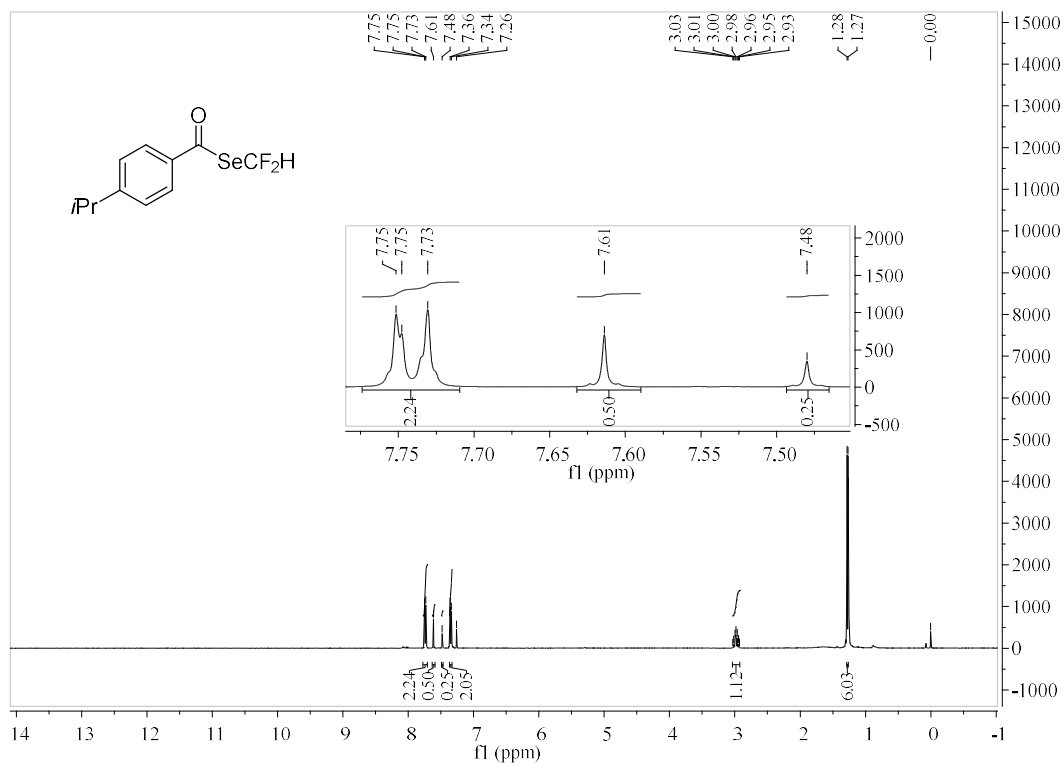

### <sup>19</sup>F NMR spectra of compound 3c

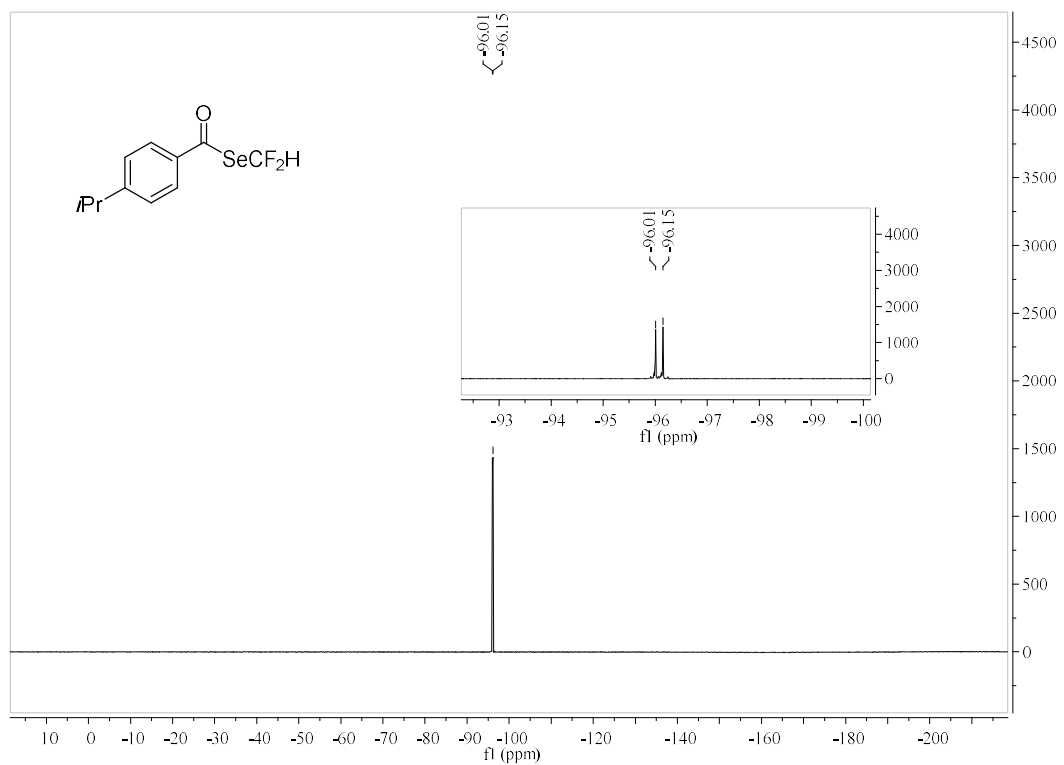

<sup>13</sup>C NMR spectra of compound **3c**

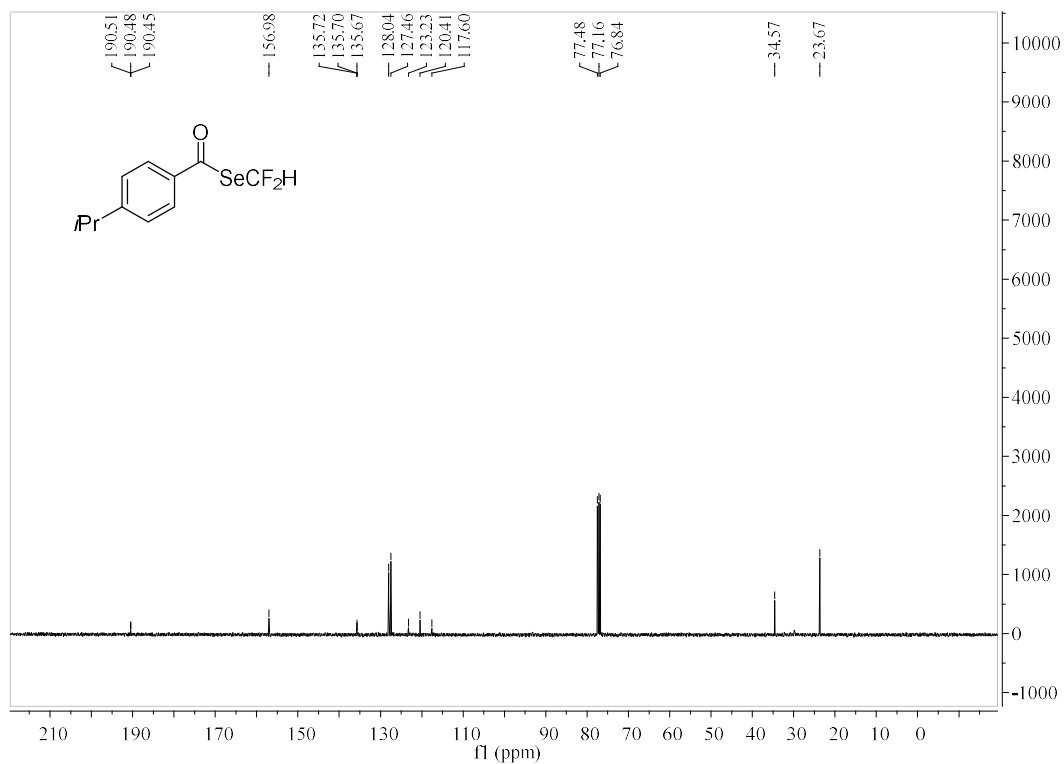

<sup>1</sup>H NMR spectra of compound **3d**

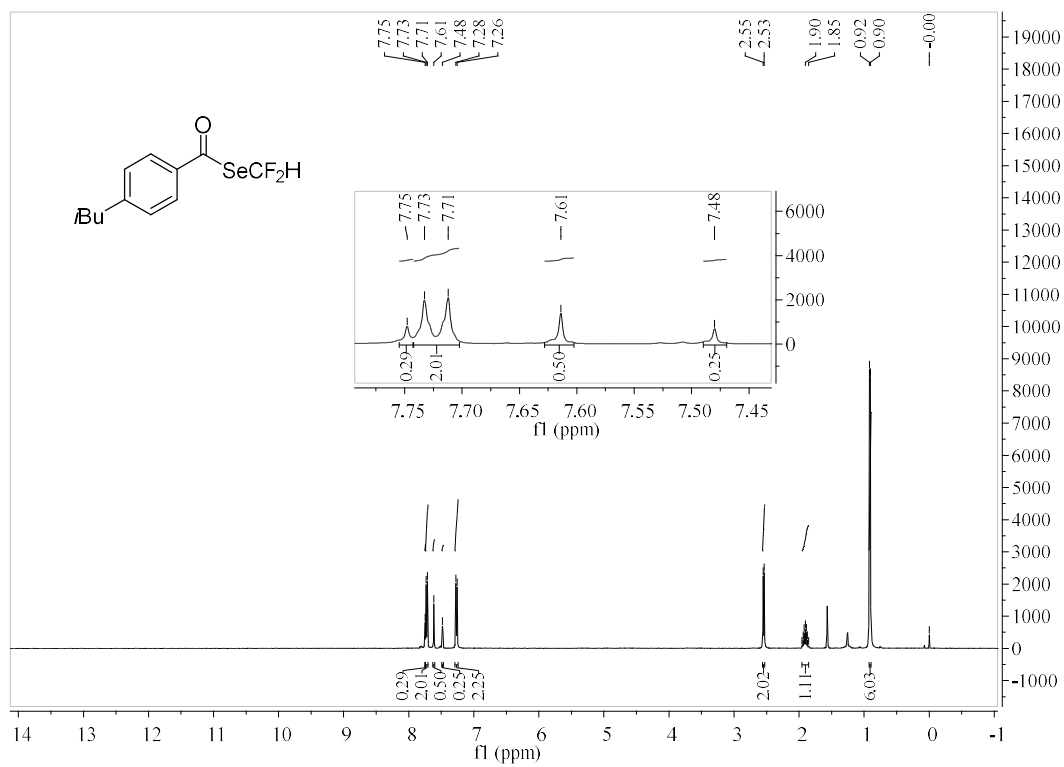

<sup>19</sup>F NMR spectra of compound **3d**

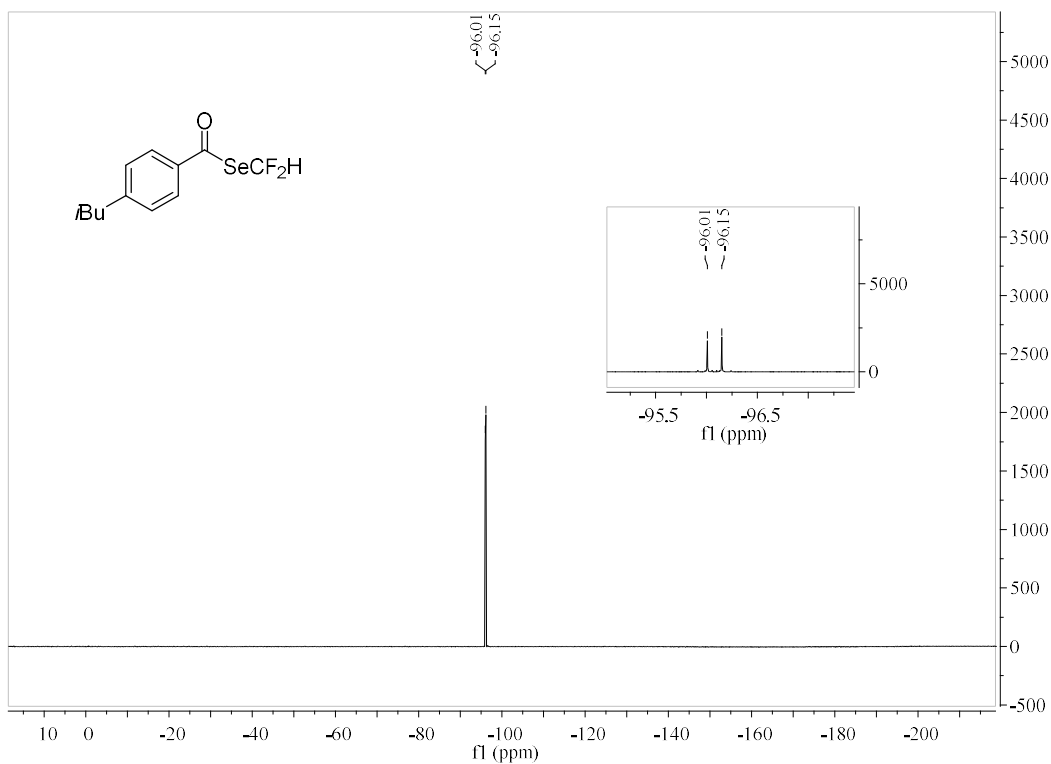

<sup>13</sup>C NMR spectra of compound **3d**

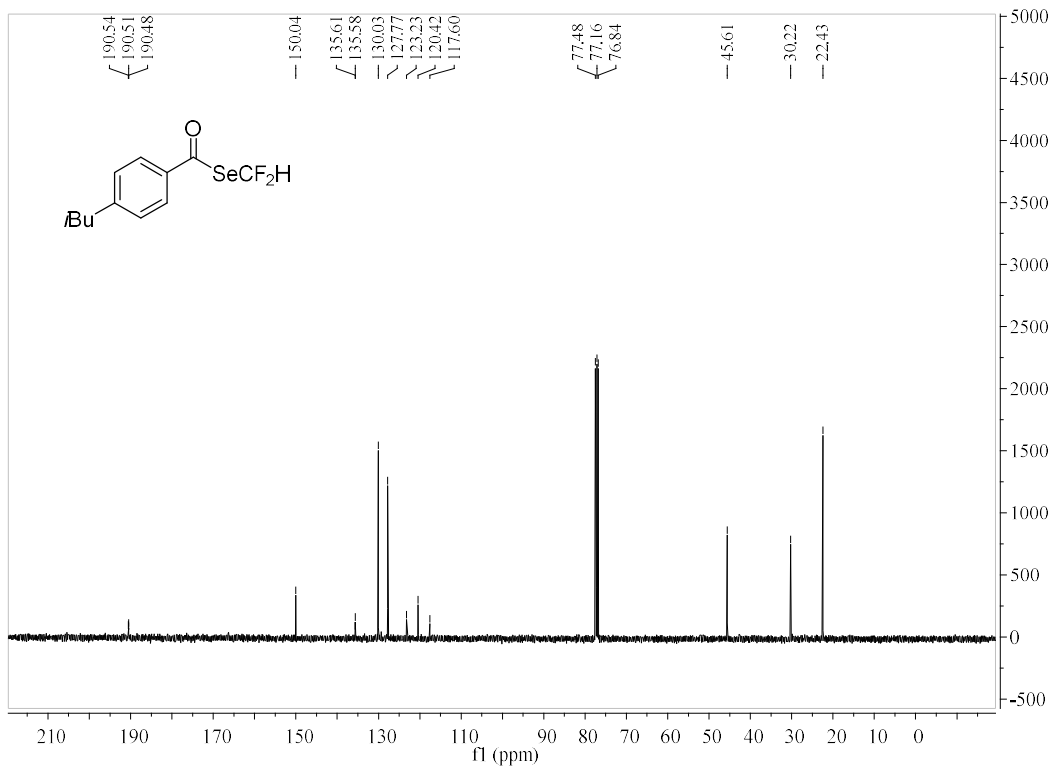

### <sup>1</sup>H NMR spectra of compound 3e

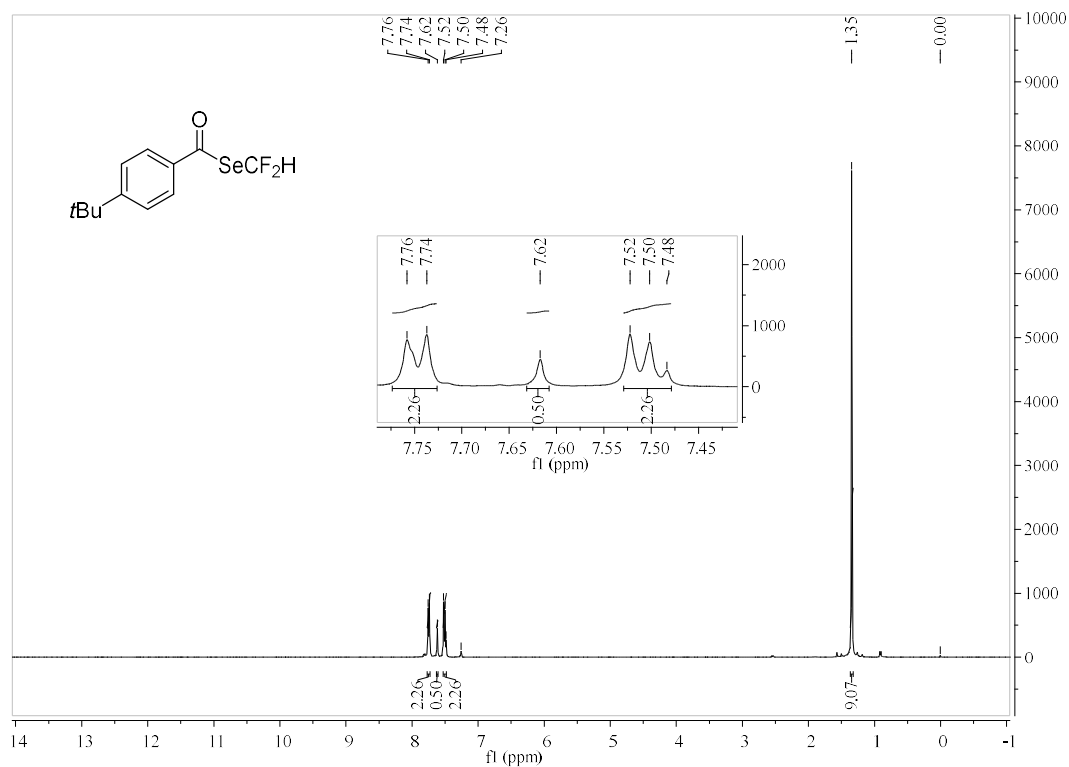

### <sup>19</sup>F NMR spectra of compound 3e

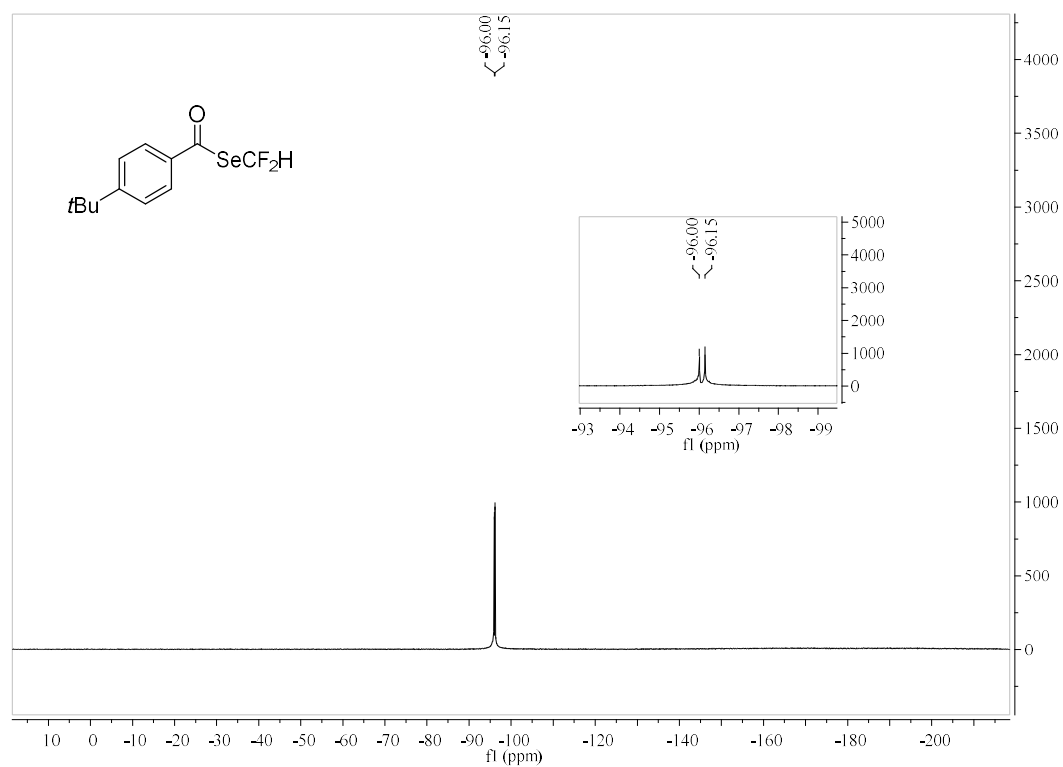

### $^{13}\text{C}$ NMR spectra of compound **3e**

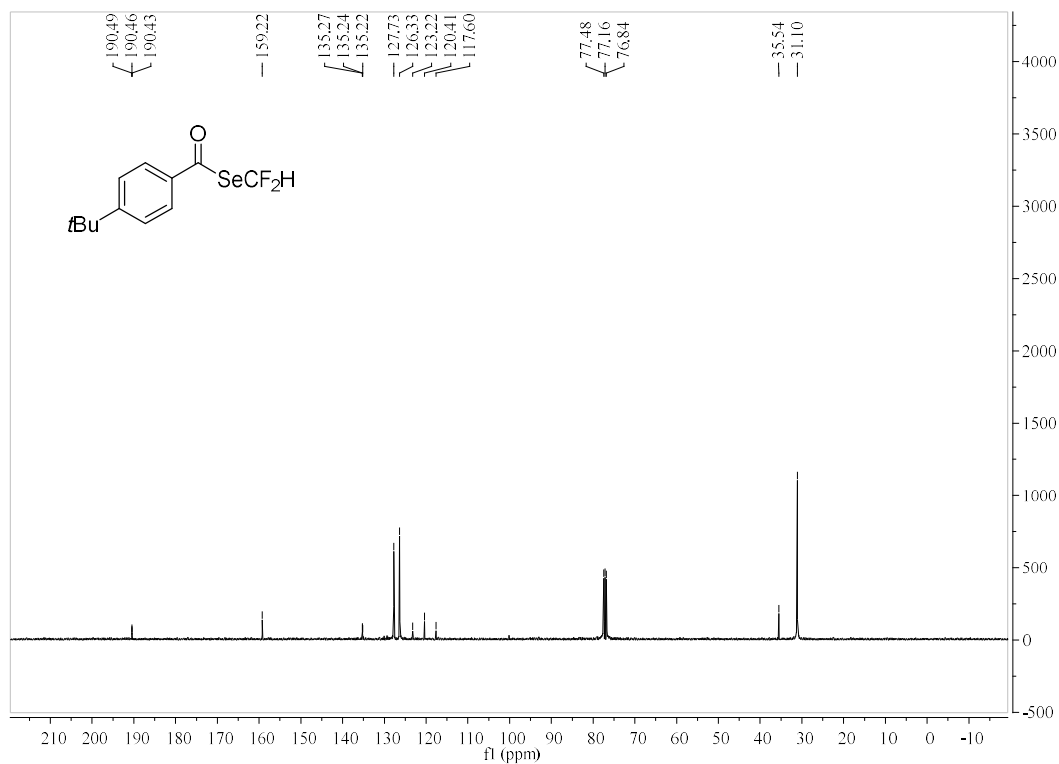

### $^1\text{H}$ NMR spectra of compound **3f**

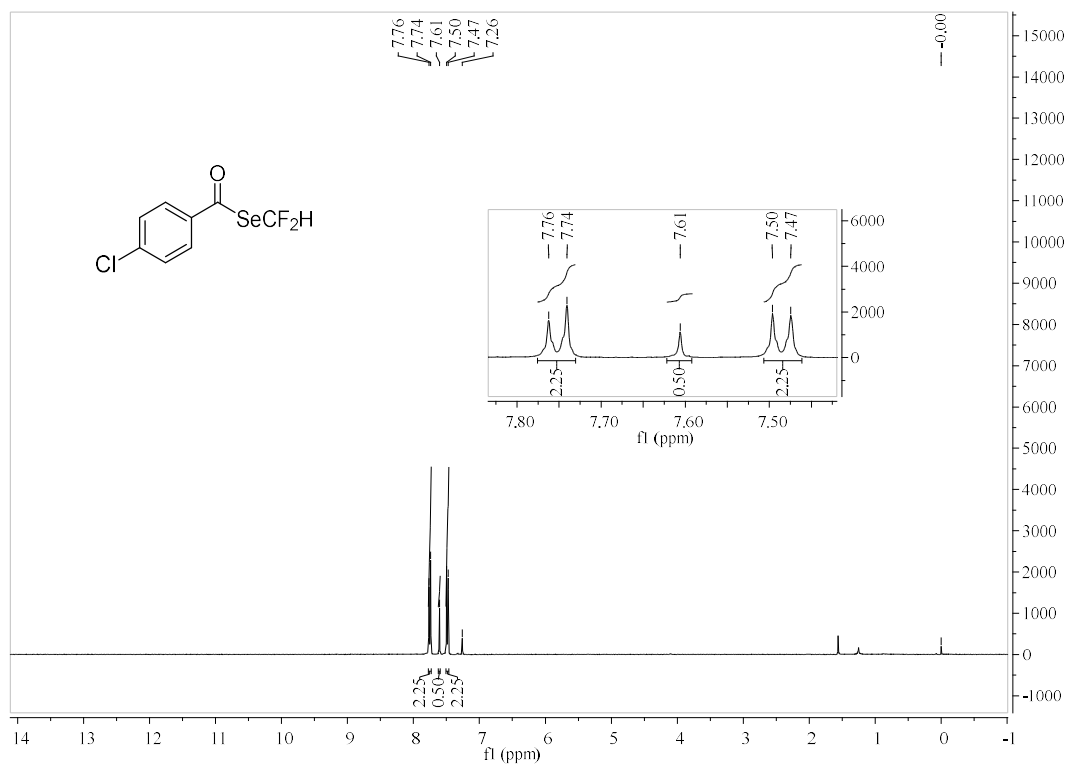

<sup>19</sup>F NMR spectra of compound **3f**

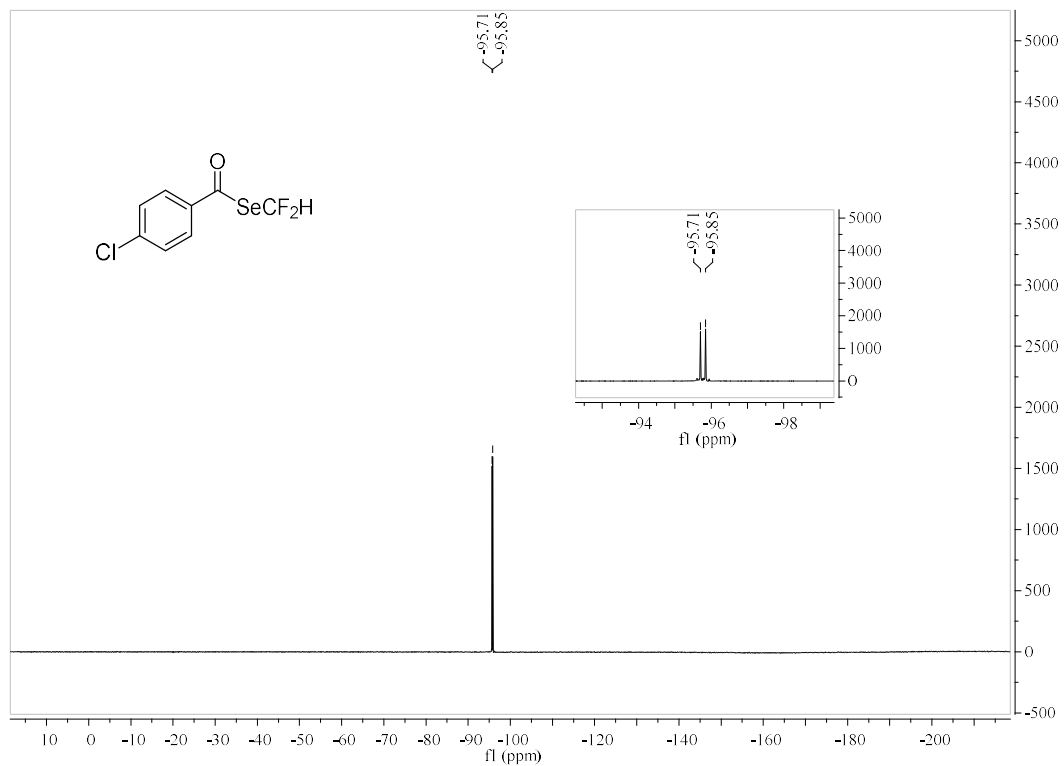

<sup>13</sup>C NMR spectra of compound **3f**

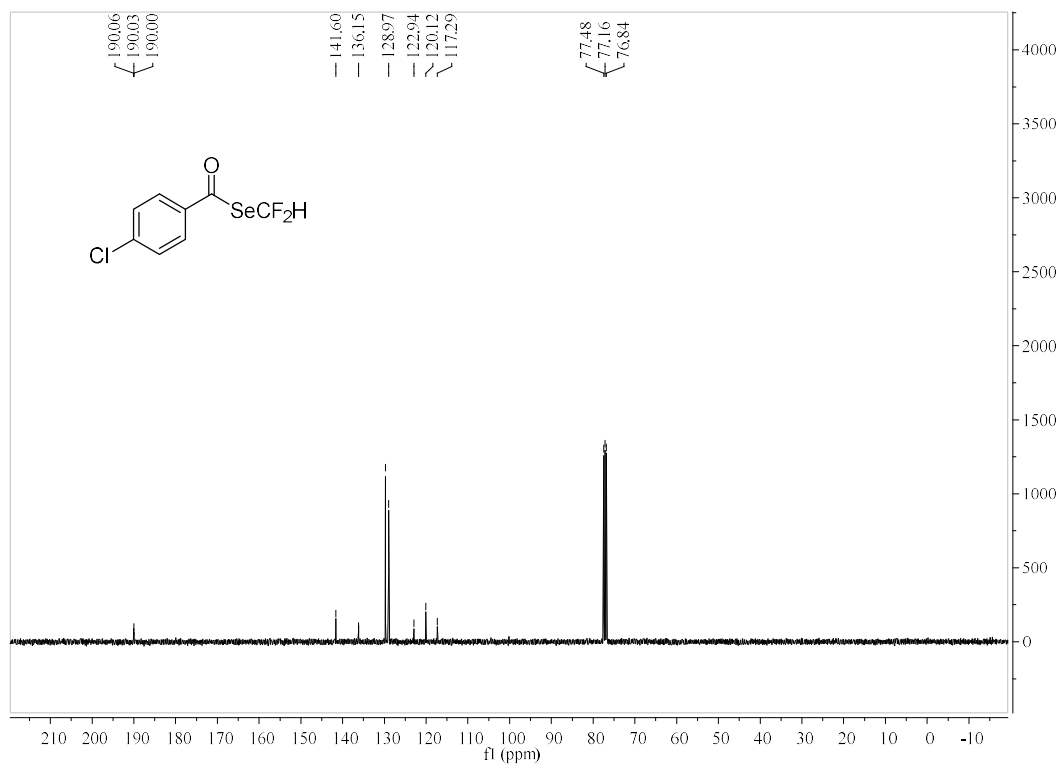

### <sup>1</sup>H NMR spectra of compound **3g**

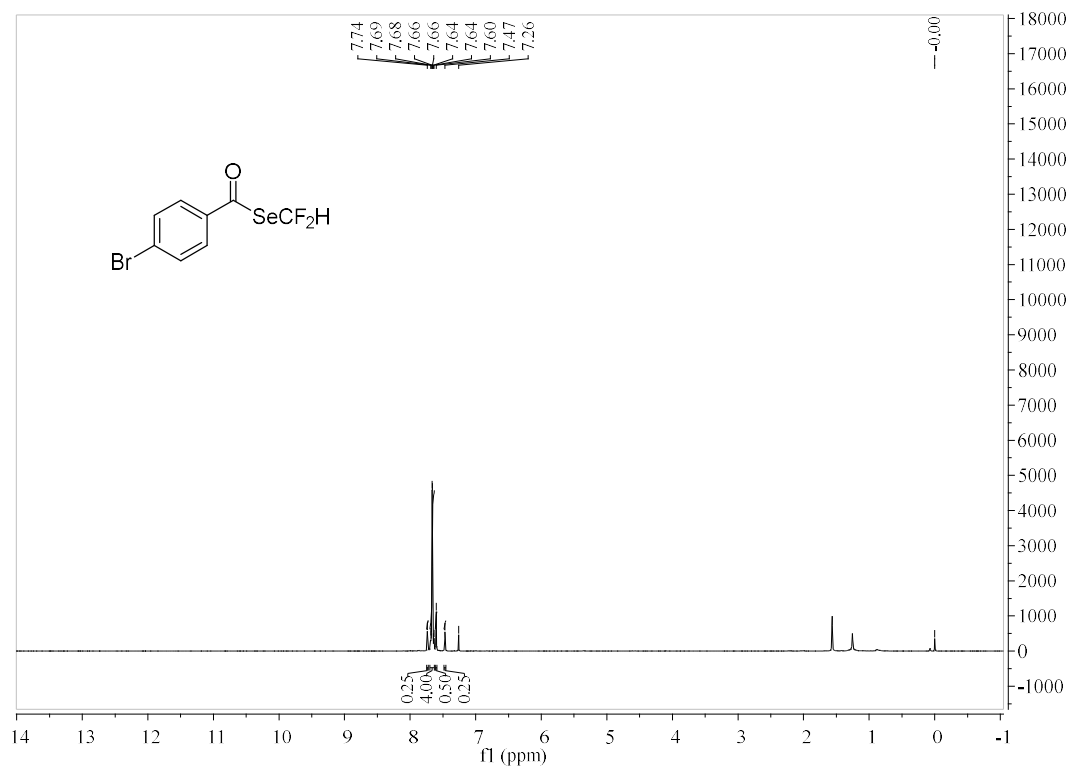

### <sup>19</sup>F NMR spectra of compound **3g**

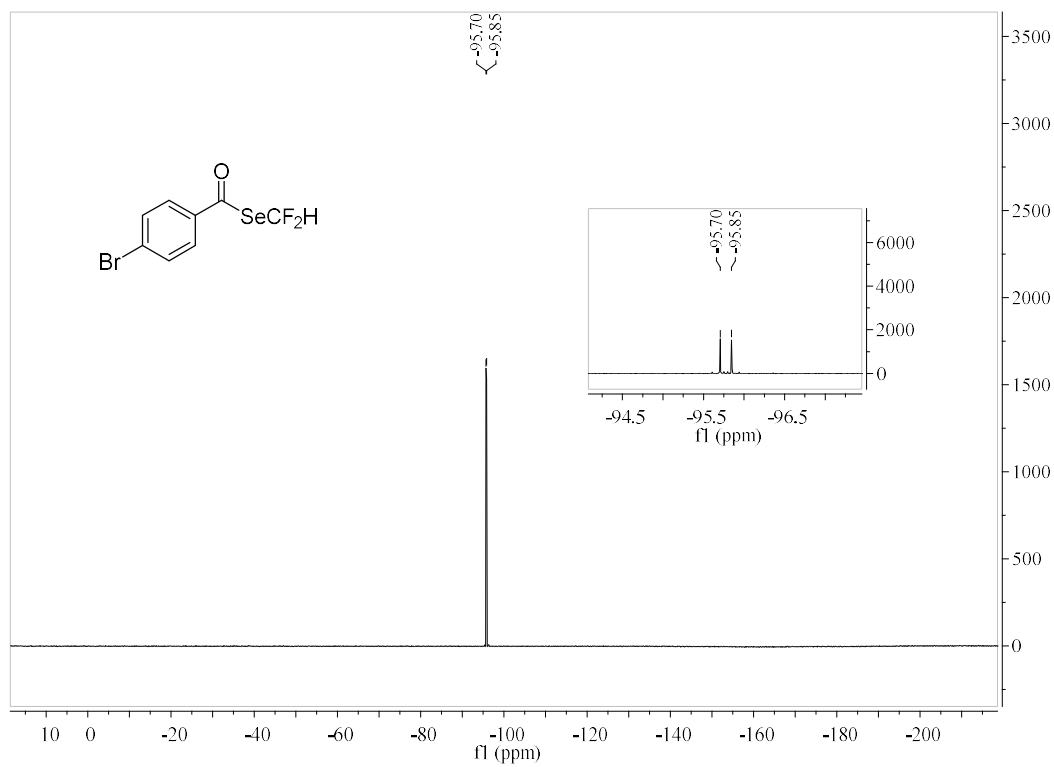



### <sup>13</sup>C NMR spectra of compound **3g**

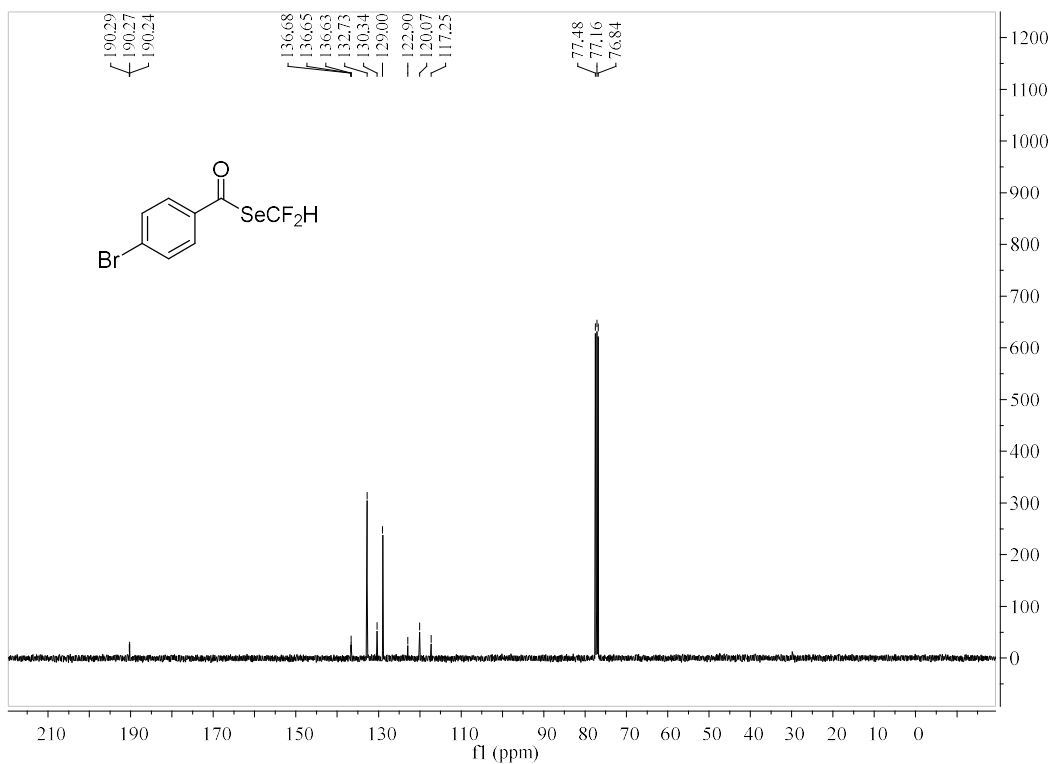

### <sup>1</sup>H NMR spectra of compound **3h**

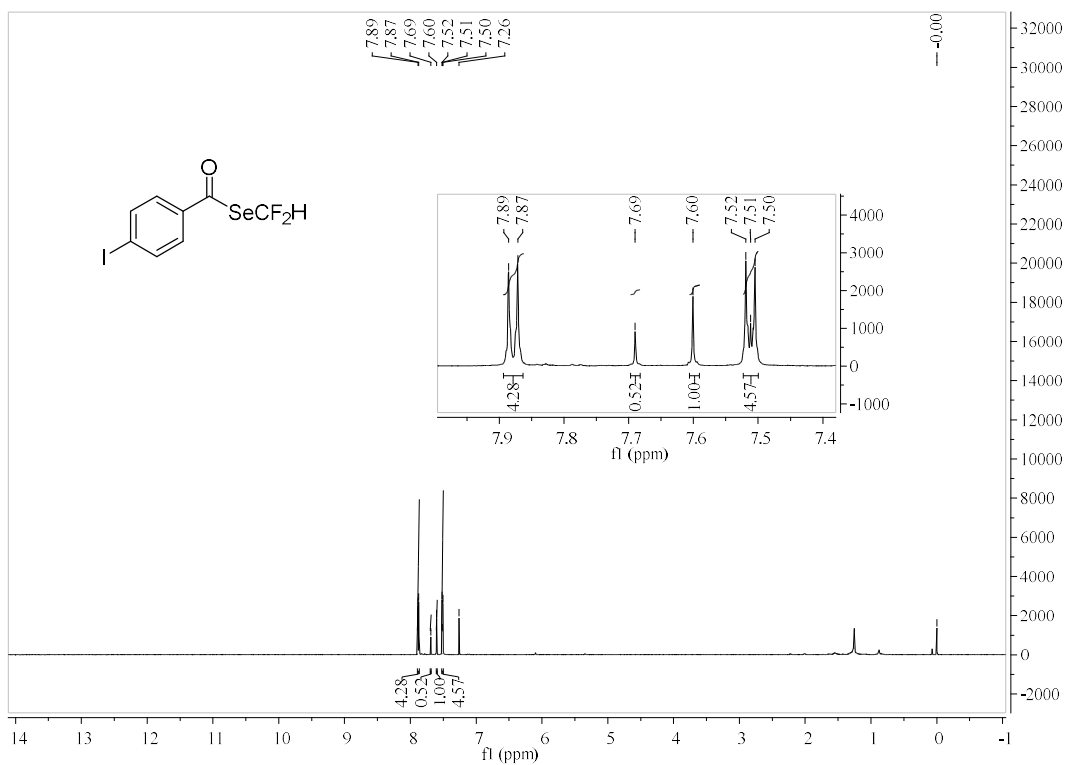

### $^{19}\text{F}$ NMR spectra of compound **3h**

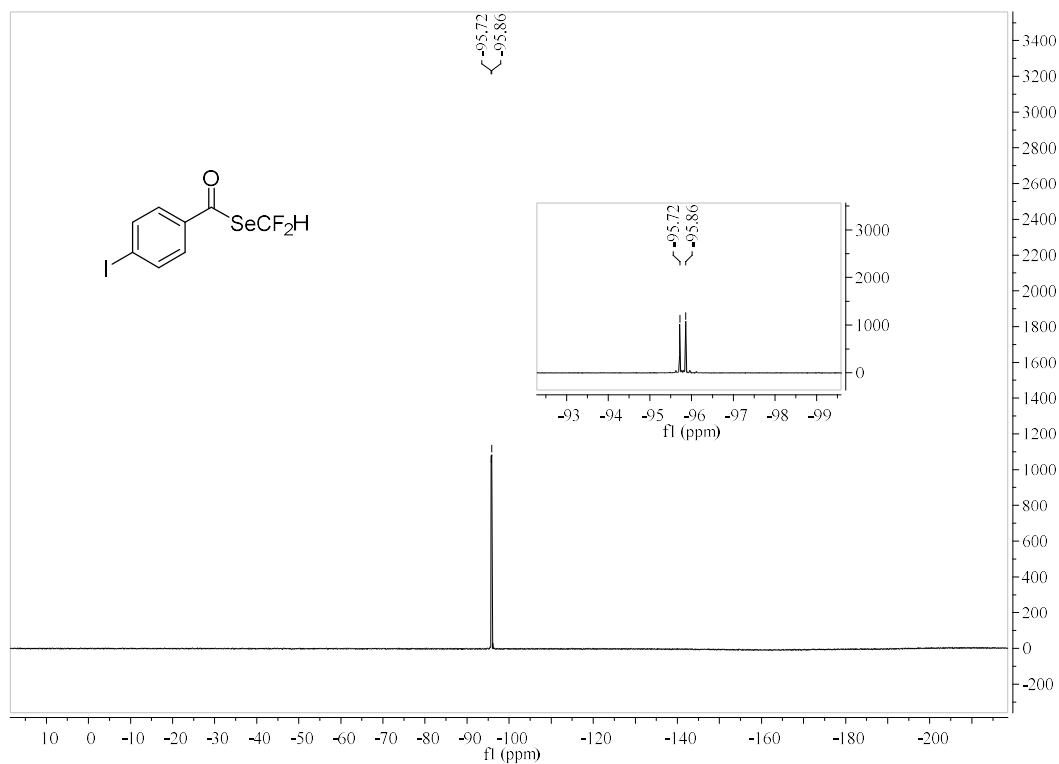

### $^{13}\text{C}$ NMR spectra of compound **3h**

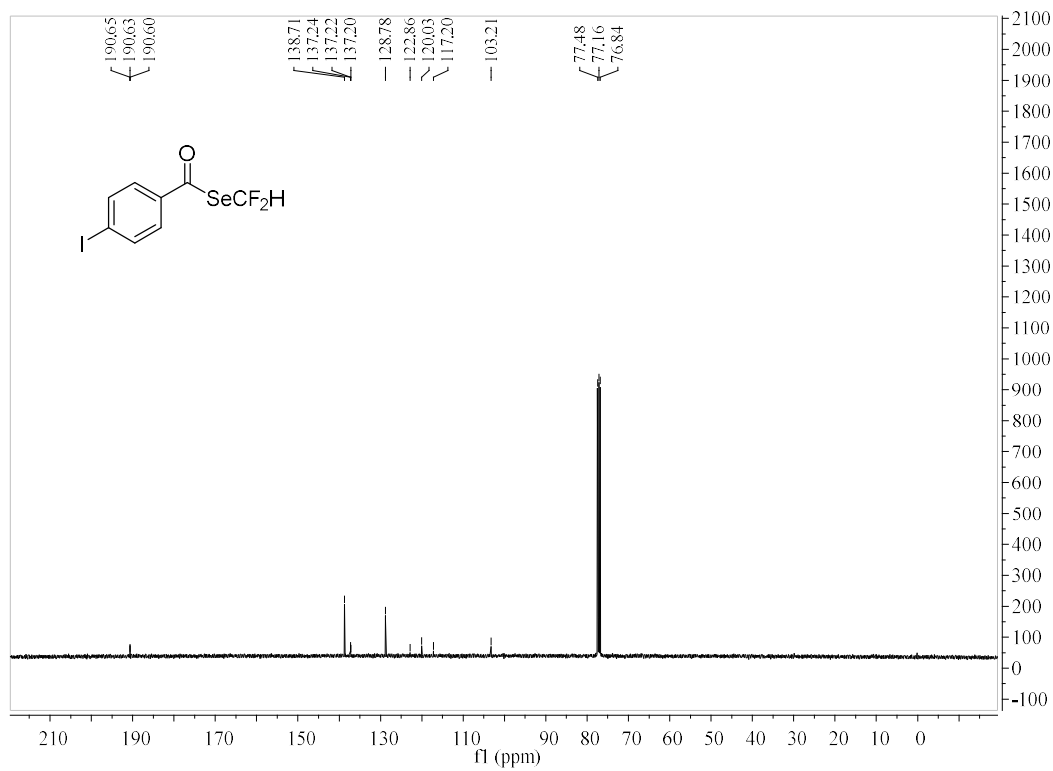

### <sup>1</sup>H NMR spectra of compound **3i**

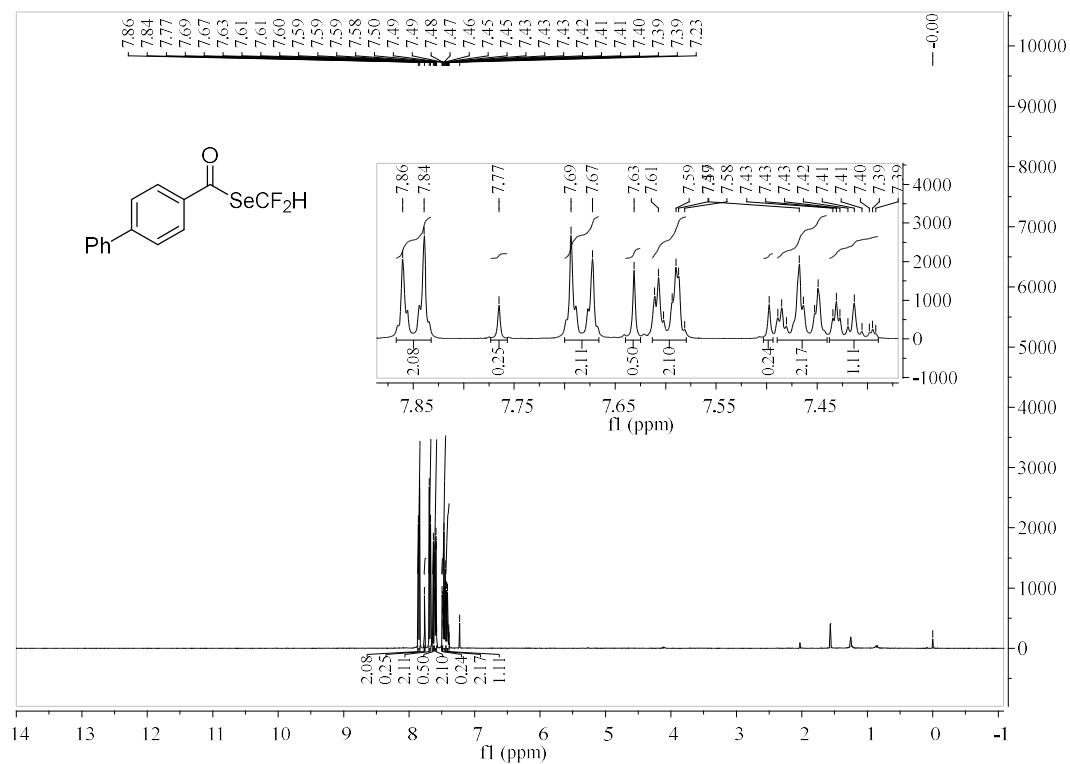

### <sup>19</sup>F NMR spectra of compound **3i**

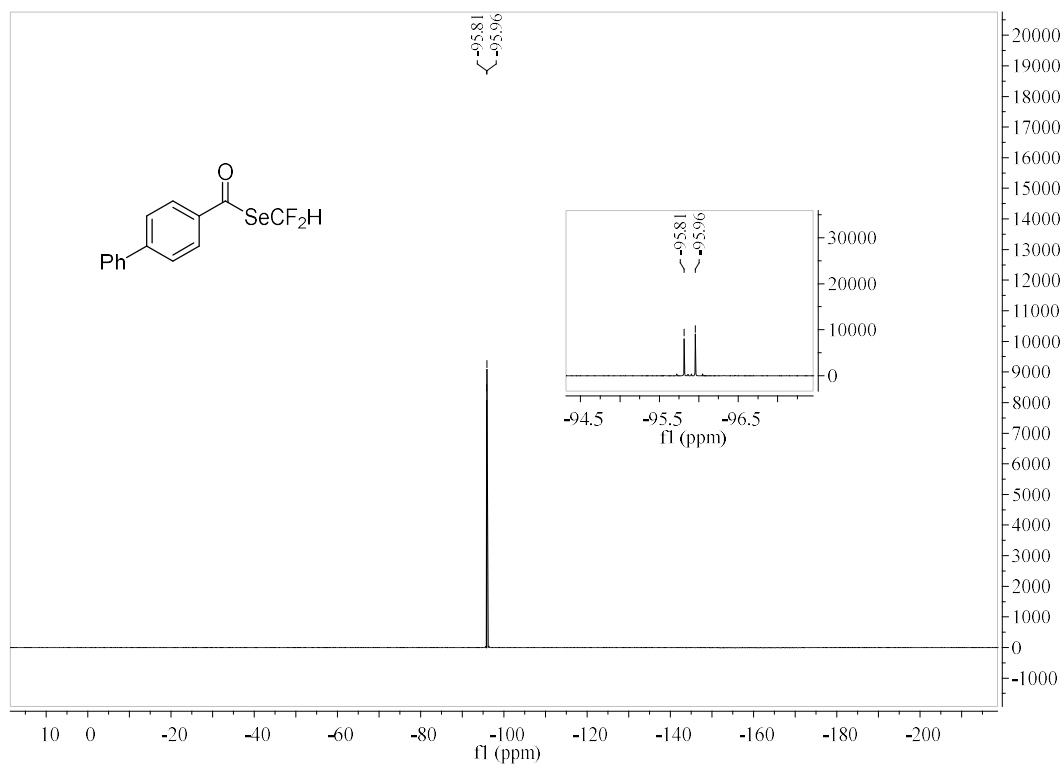

### <sup>13</sup>C NMR spectra of compound **3i**

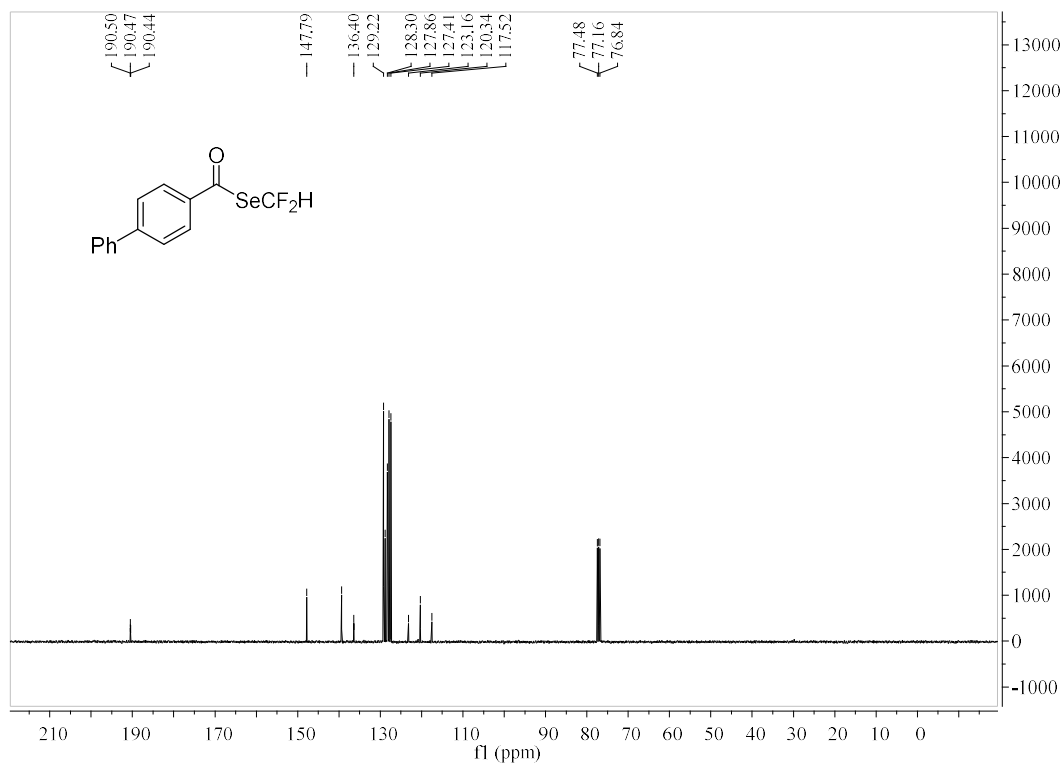

### <sup>1</sup>H NMR spectra of compound **3j**

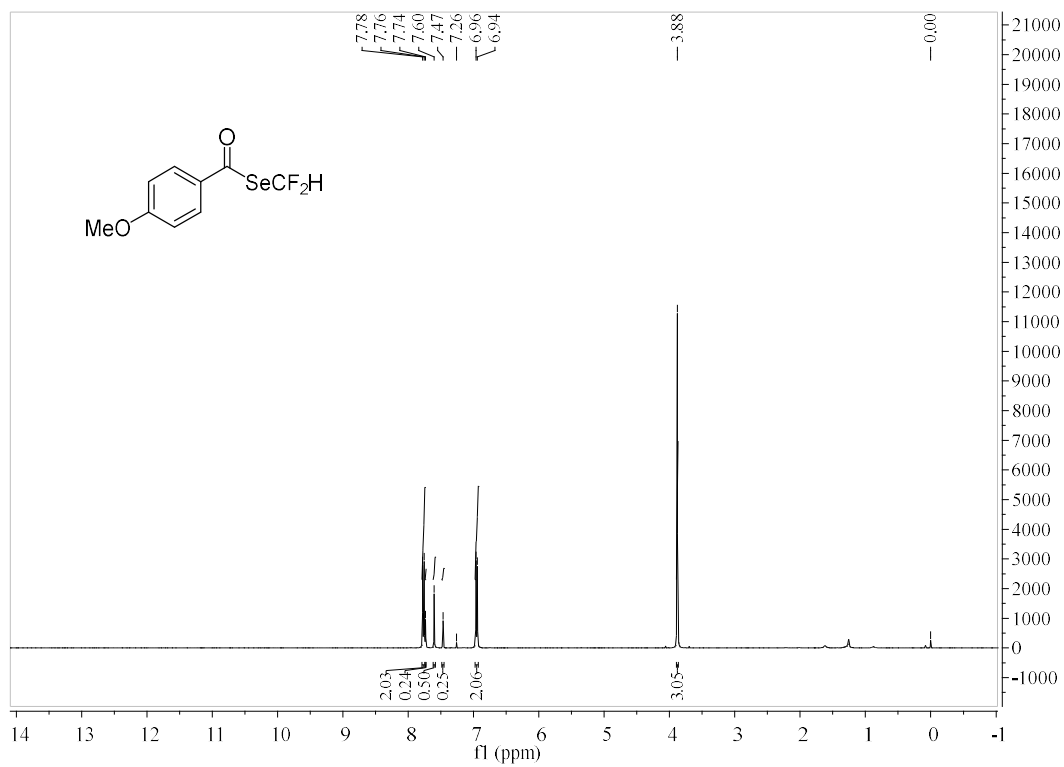

### <sup>19</sup>F NMR spectra of compound **3j**

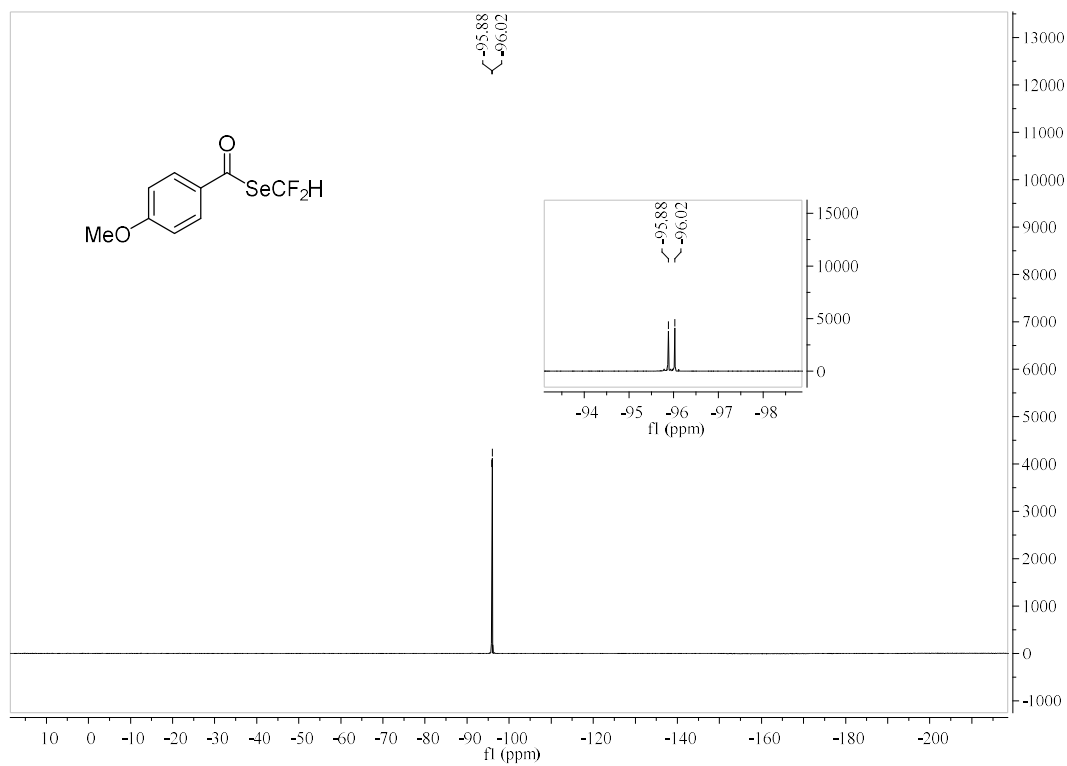

### <sup>13</sup>C NMR spectra of compound **3j**

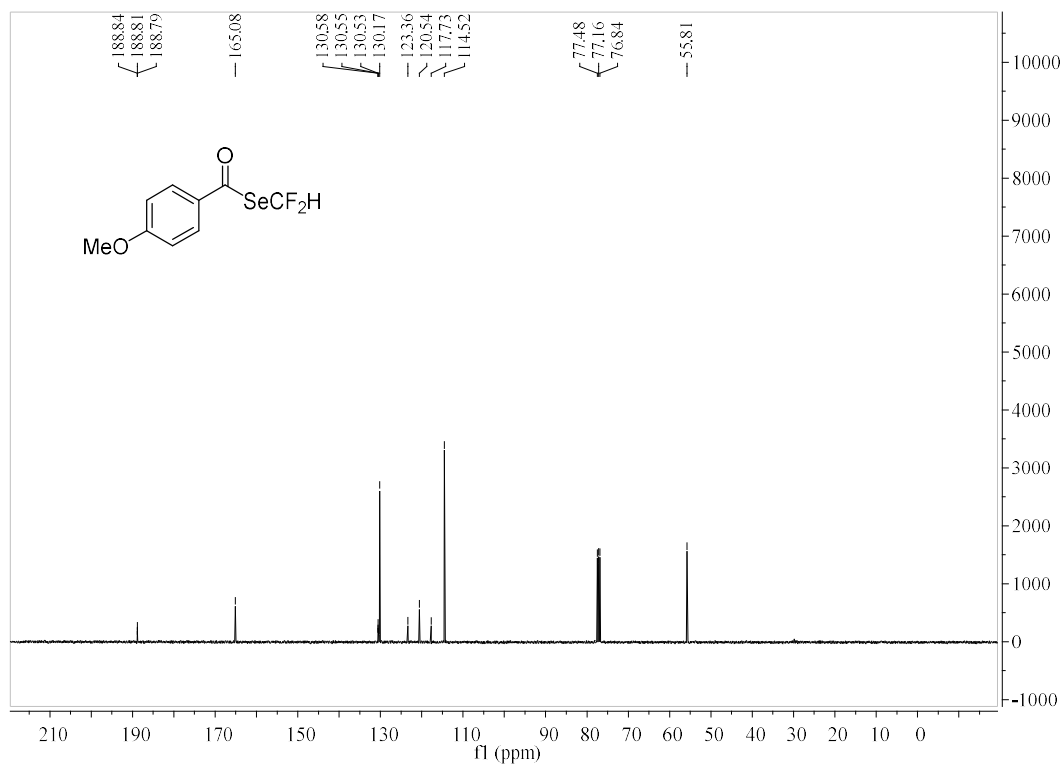

### $^1\text{H}$ NMR spectra of compound **3k**

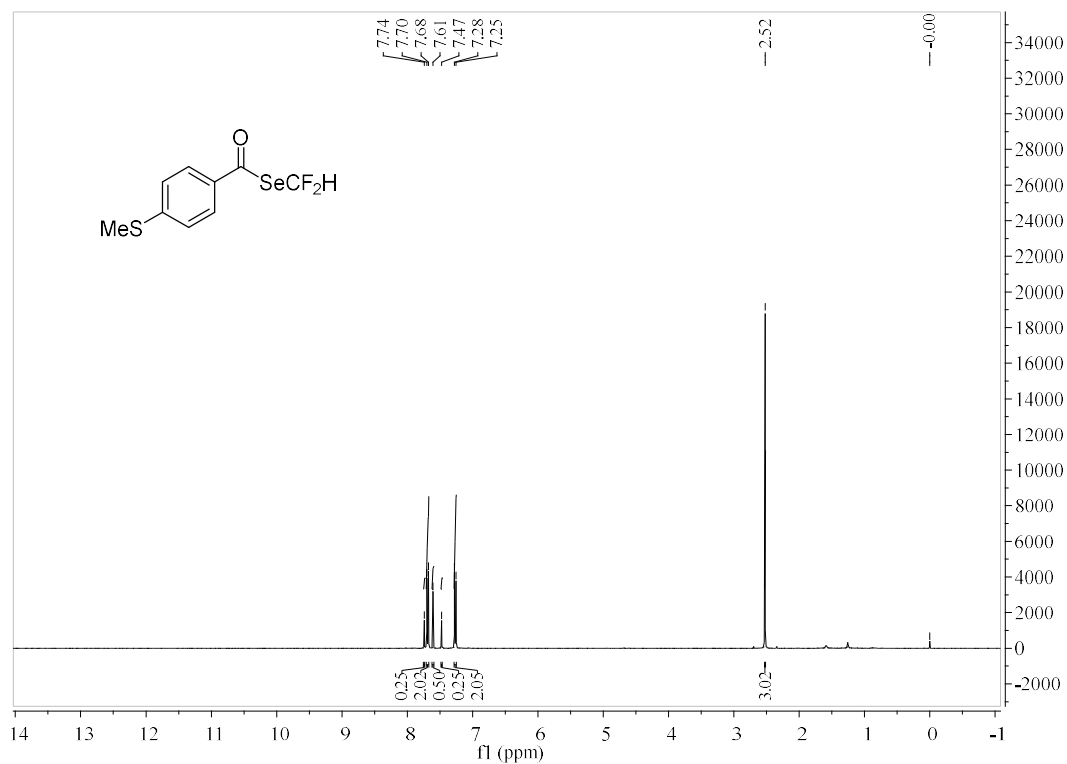

### $^{19}\text{F}$ NMR spectra of compound **3k**

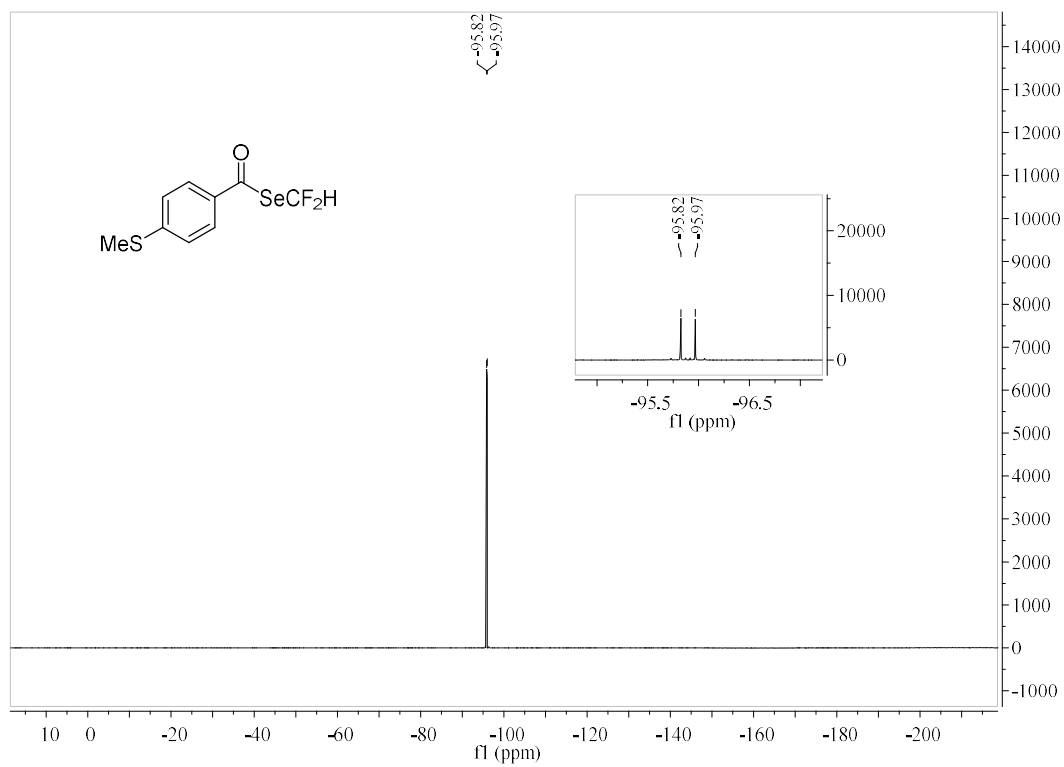

<sup>13</sup>C NMR spectra of compound **3k**

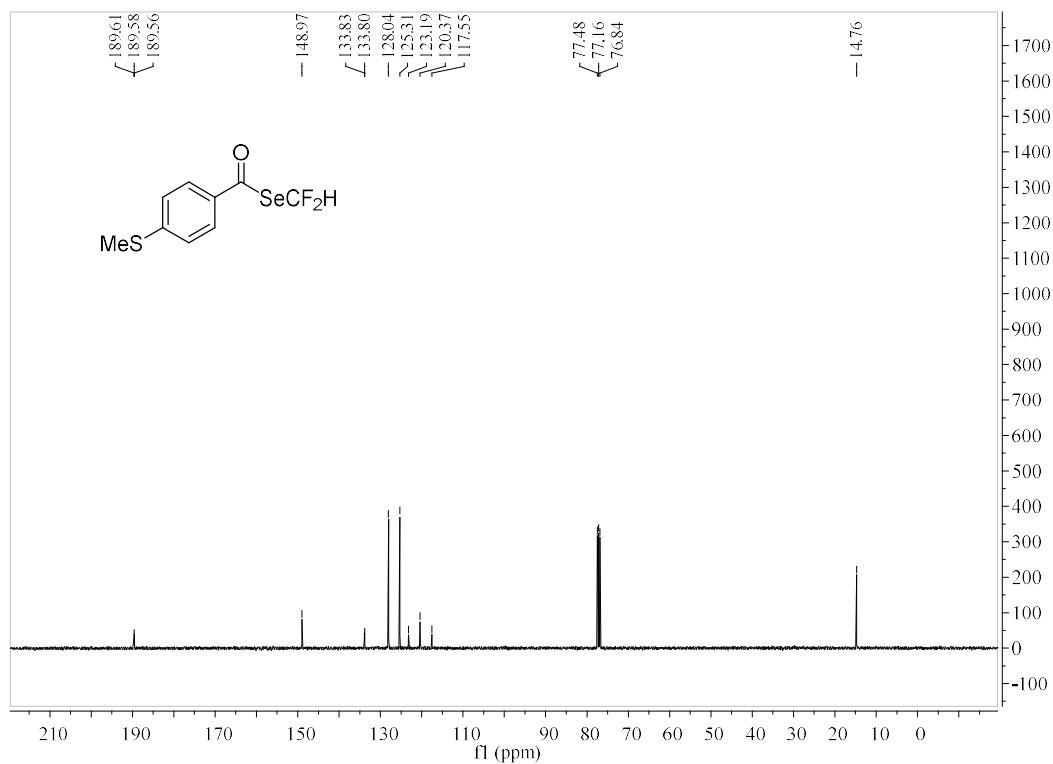

<sup>1</sup>H NMR spectra of compound **3l**

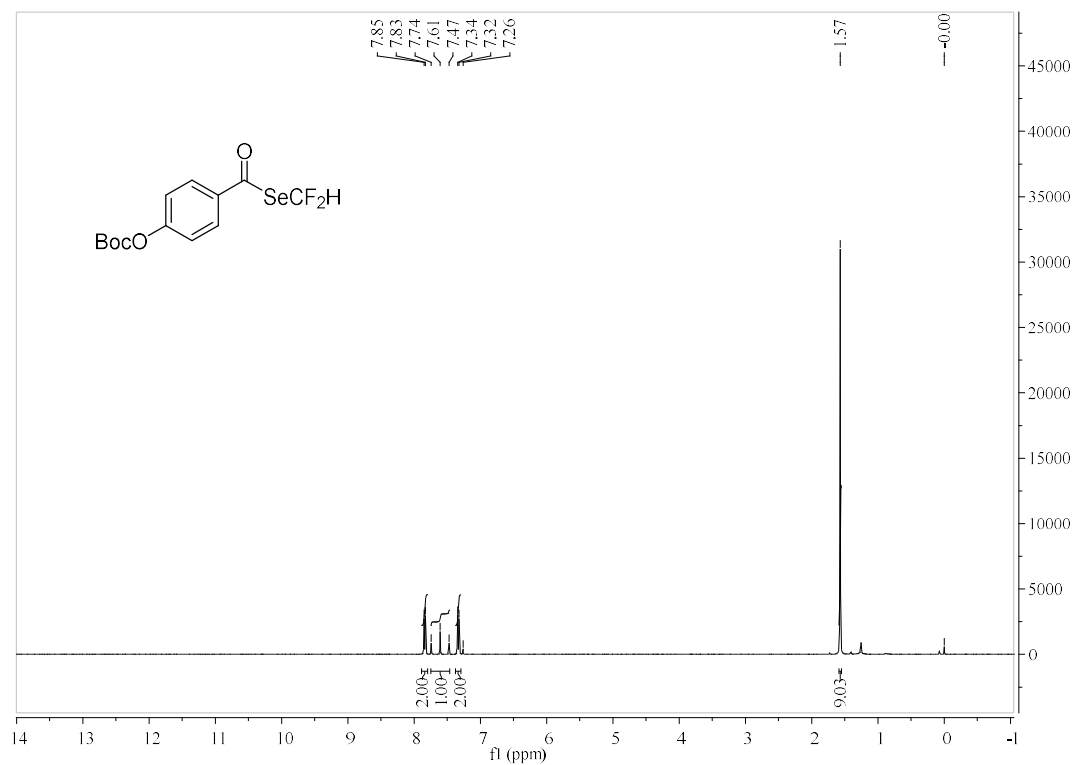

### <sup>19</sup>F NMR spectra of compound **31**

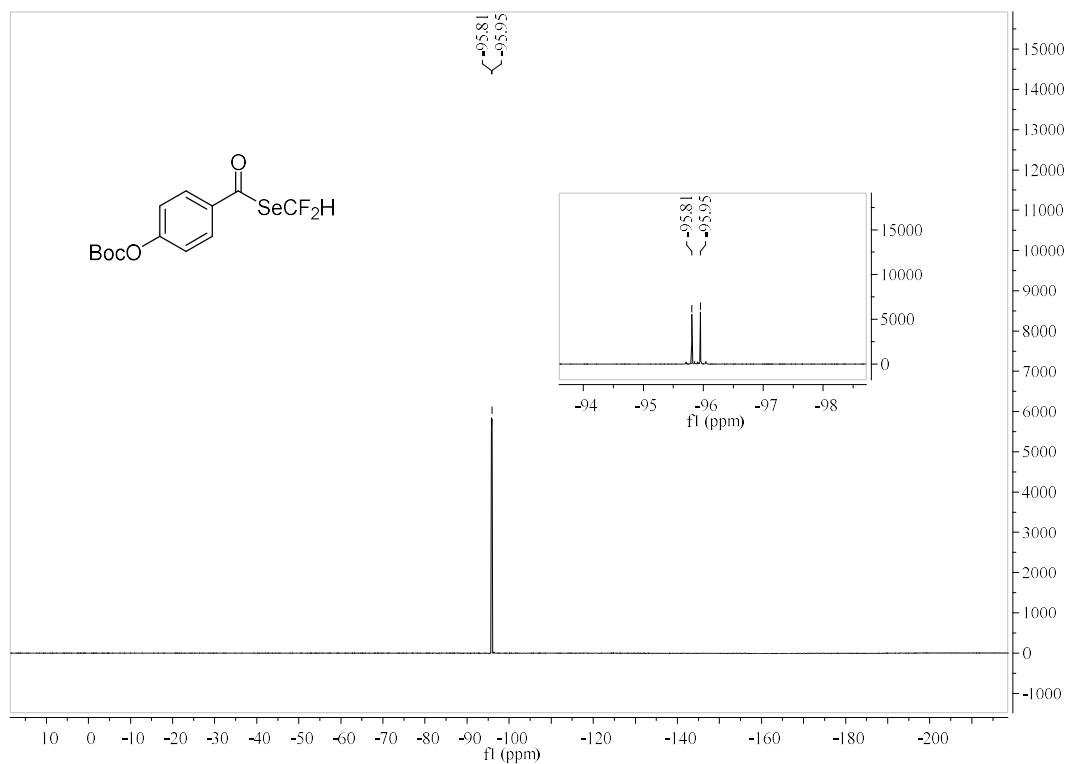

### <sup>13</sup>C NMR spectra of compound **31**

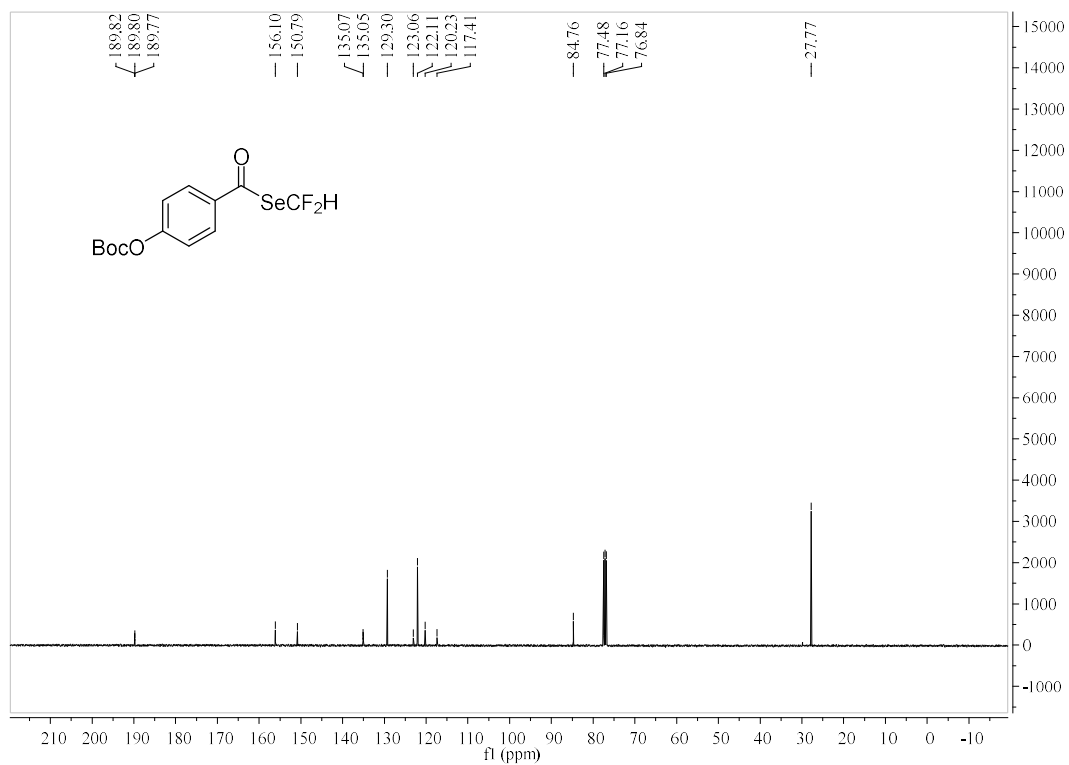



<sup>1</sup>H NMR spectra of compound **3m**

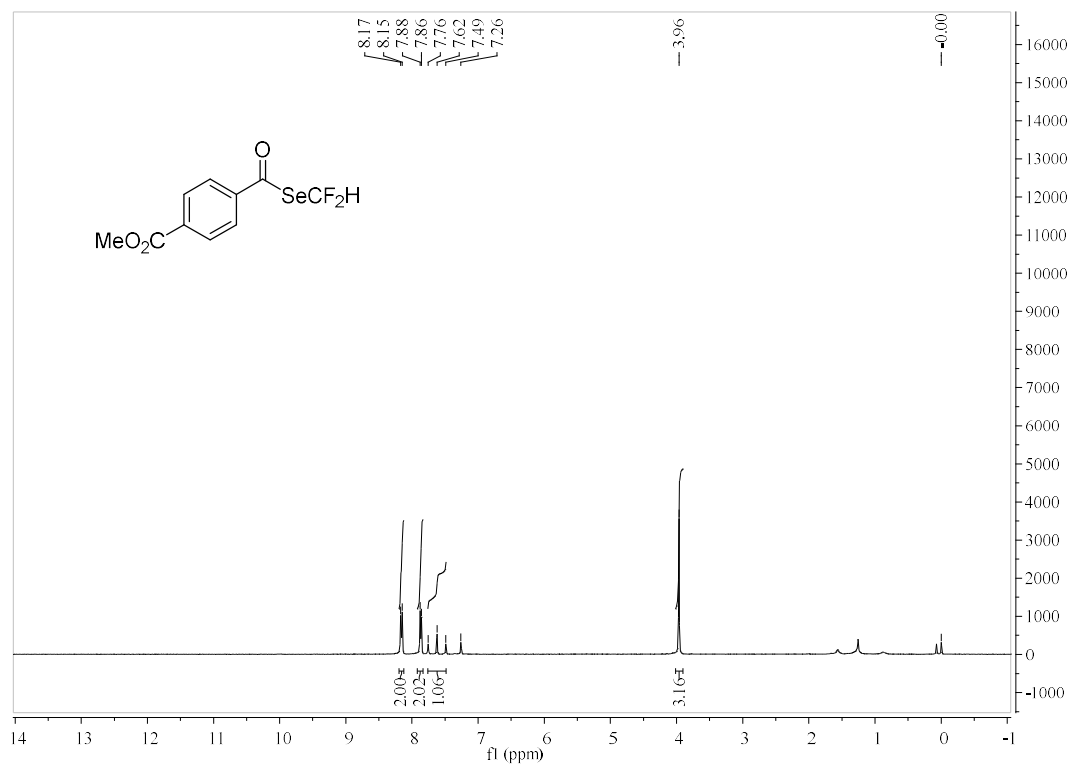

<sup>19</sup>F NMR spectra of compound **3m**

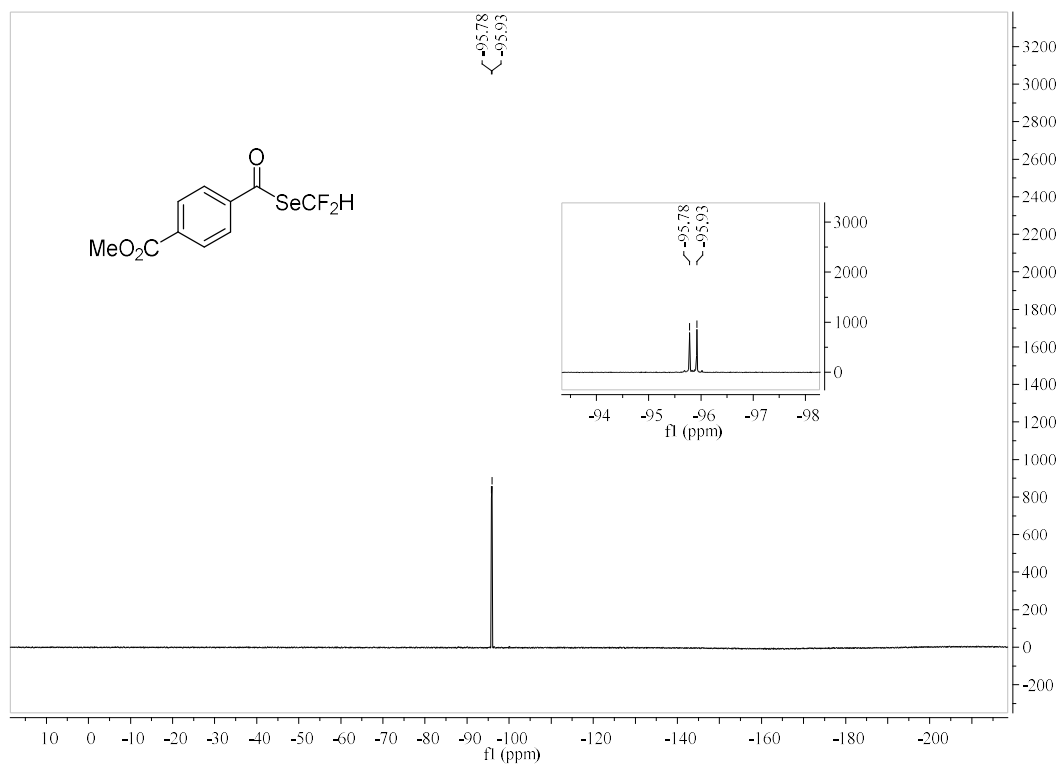

<sup>13</sup>C NMR spectra of compound **3m**

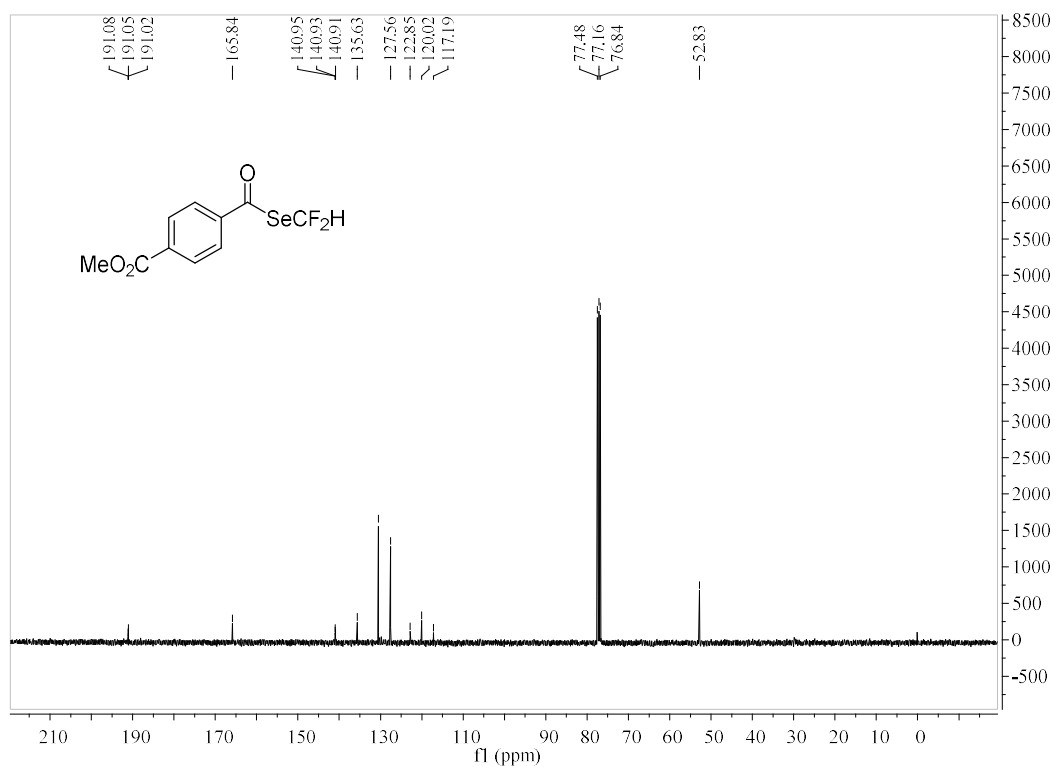

<sup>1</sup>H NMR spectra of compound **3n**

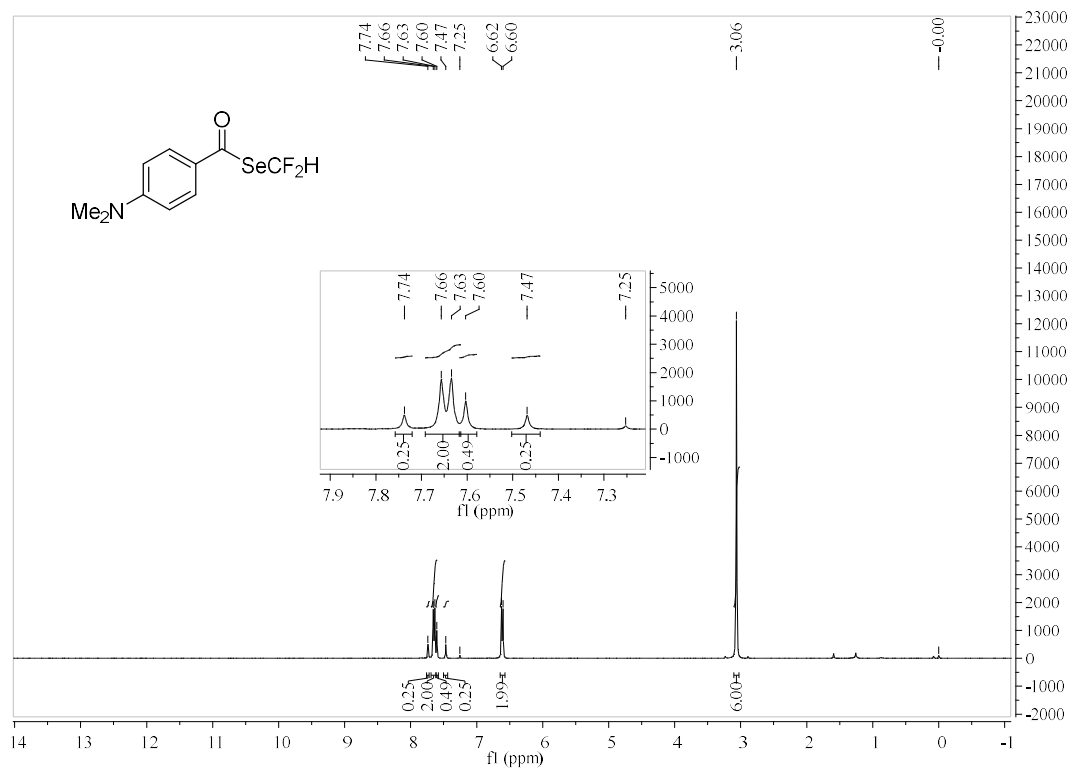

### $^{19}\text{F}$ NMR spectra of compound **3n**

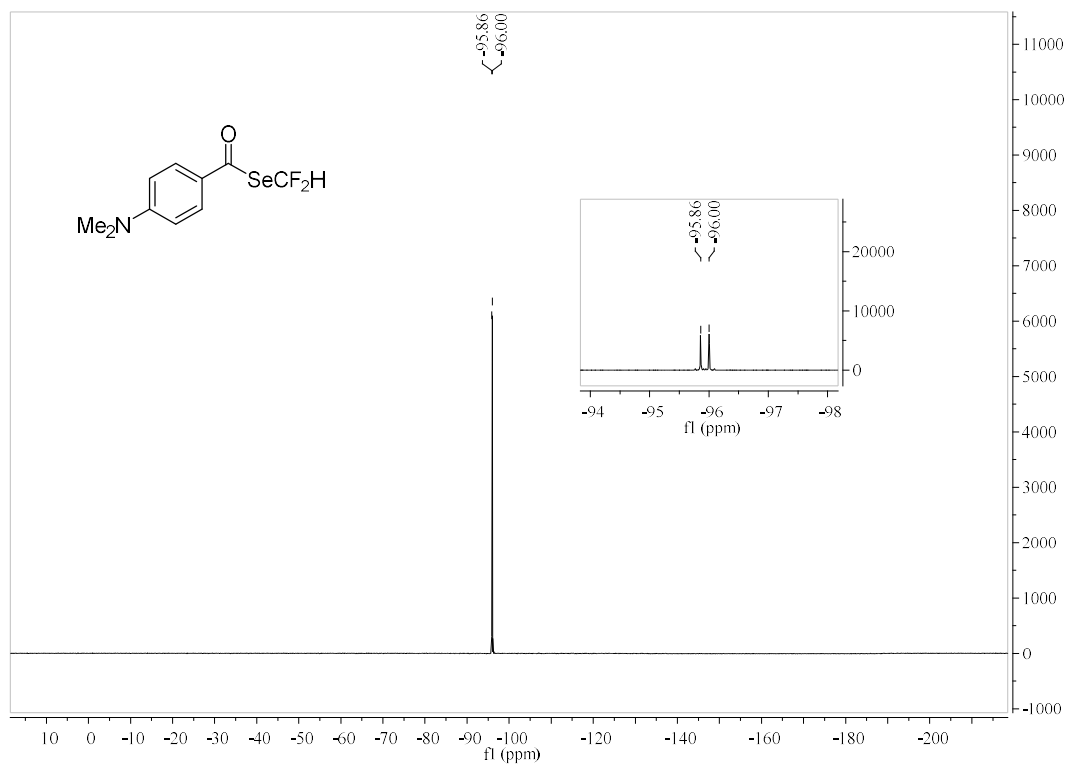

### $^{13}\text{C}$ NMR spectra of compound **3n**

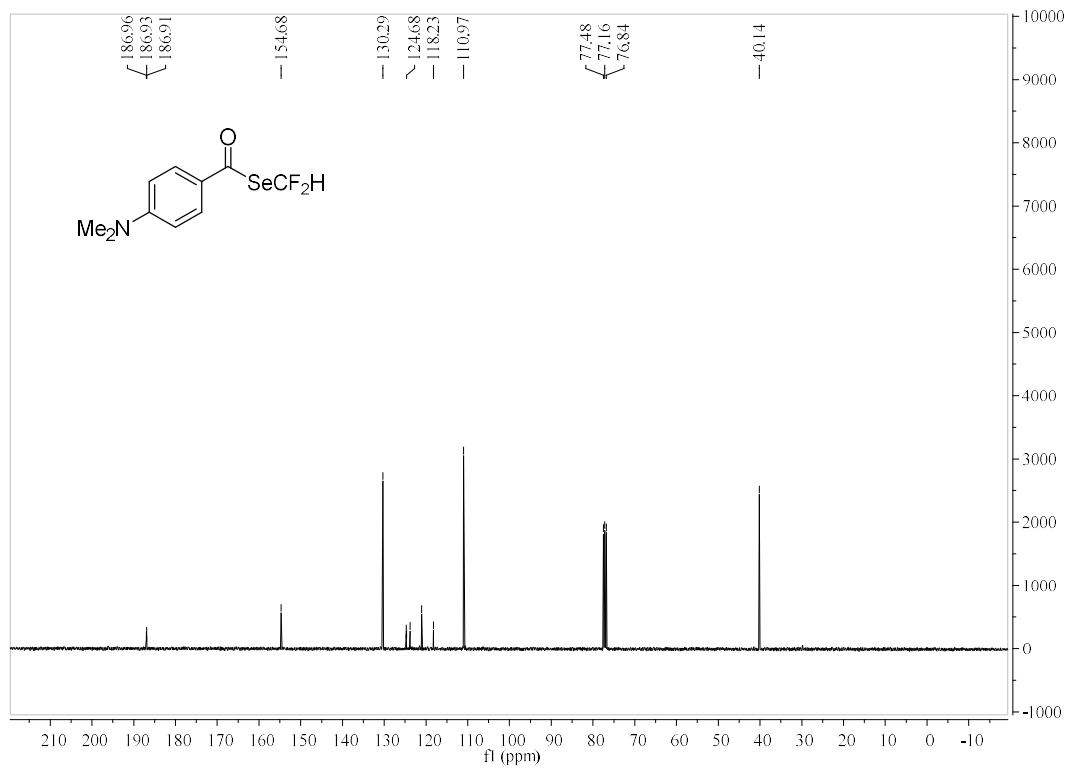

### <sup>1</sup>H NMR spectra of compound **3o**

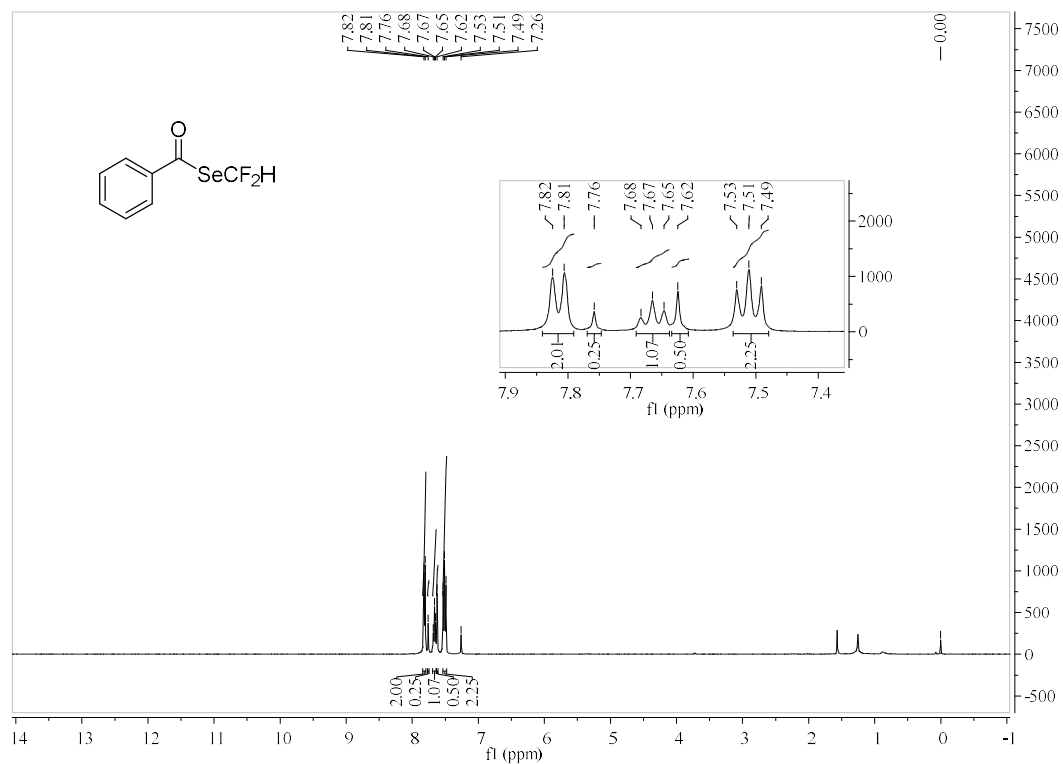

### <sup>19</sup>F NMR spectra of compound **3o**

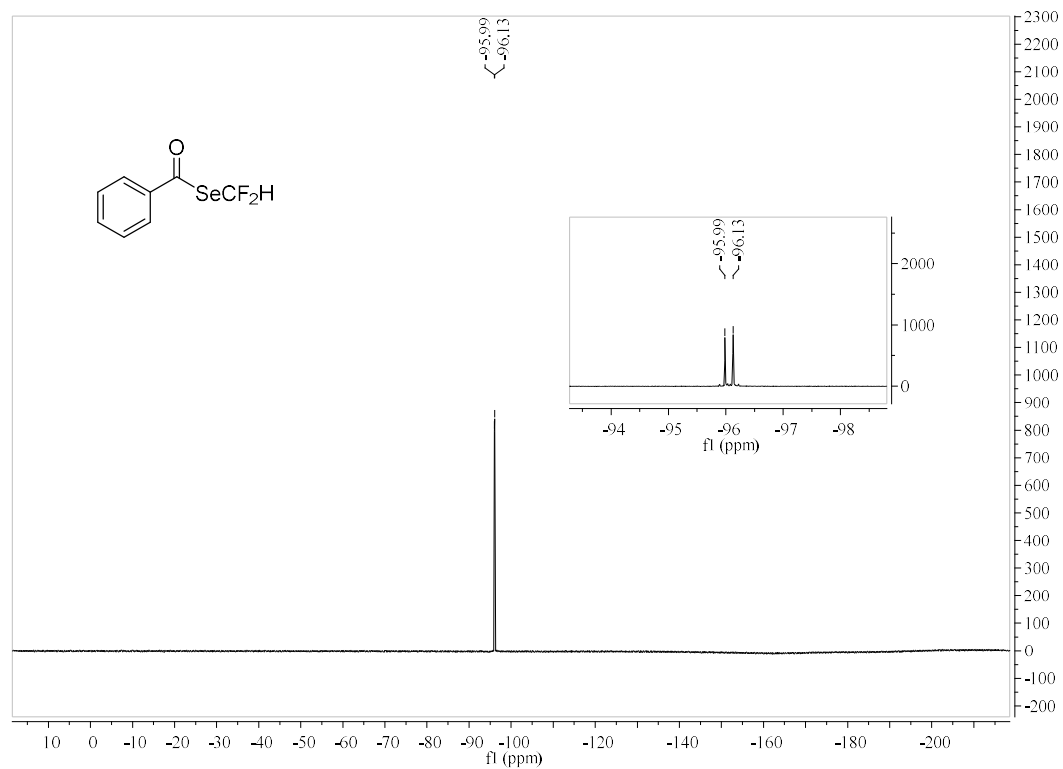

<sup>13</sup>C NMR spectra of compound **3o**

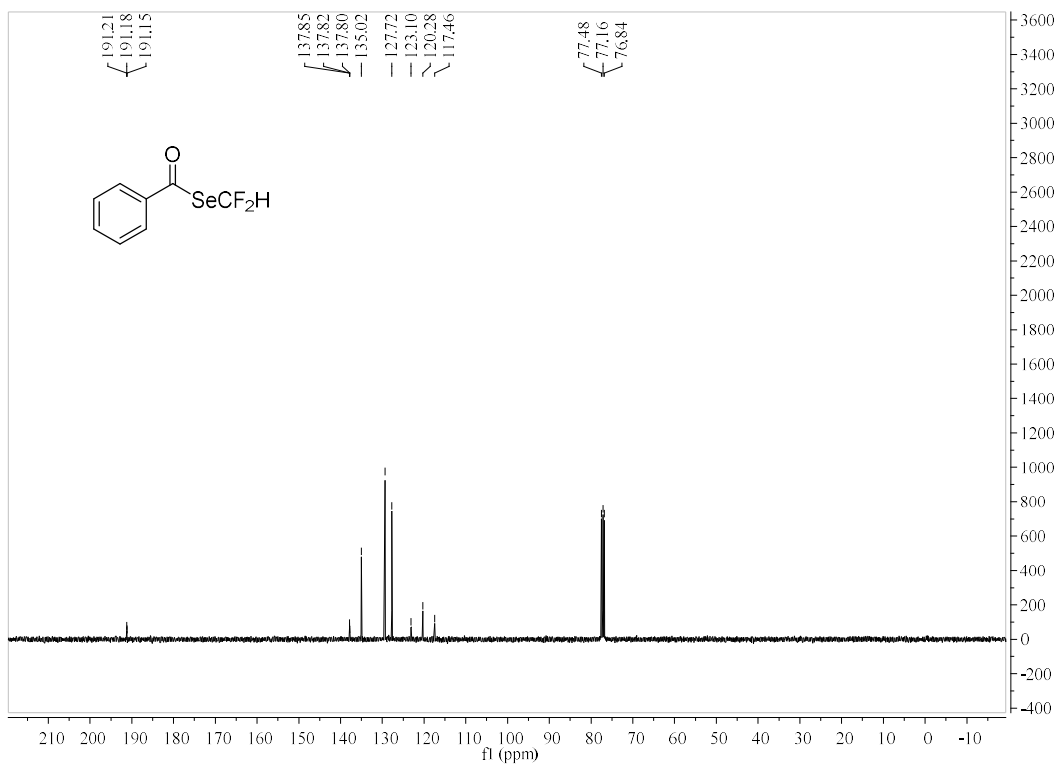

<sup>1</sup>H NMR spectra of compound **3p**

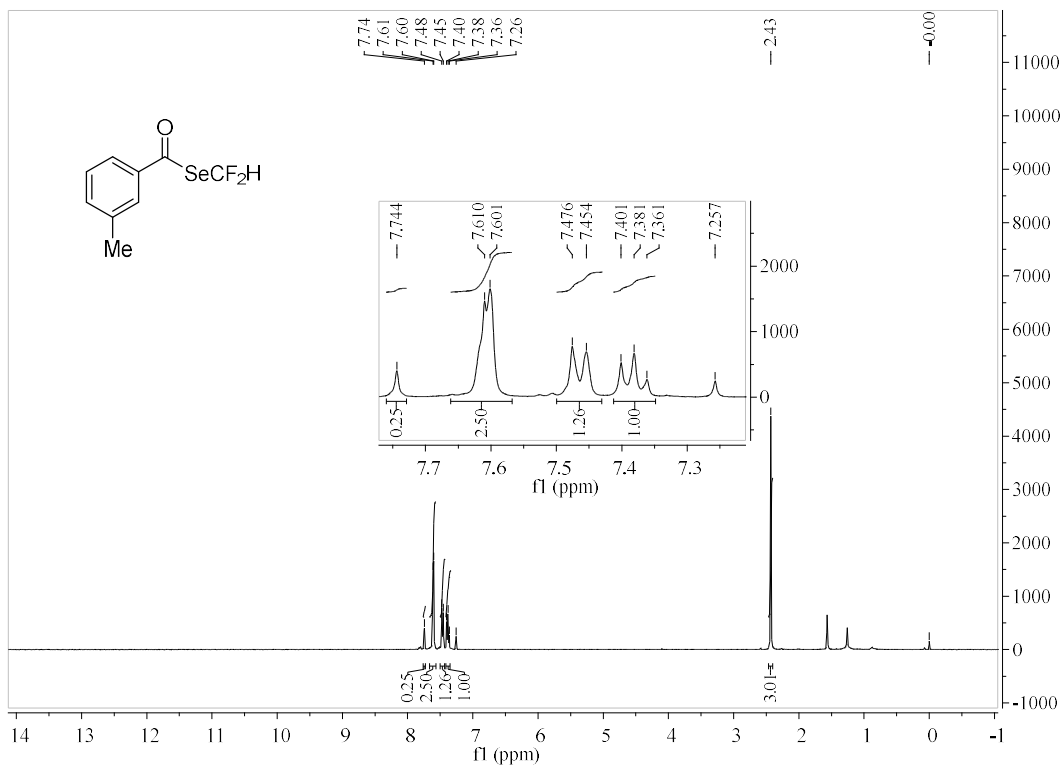

<sup>19</sup>F NMR spectra of compound **3p**

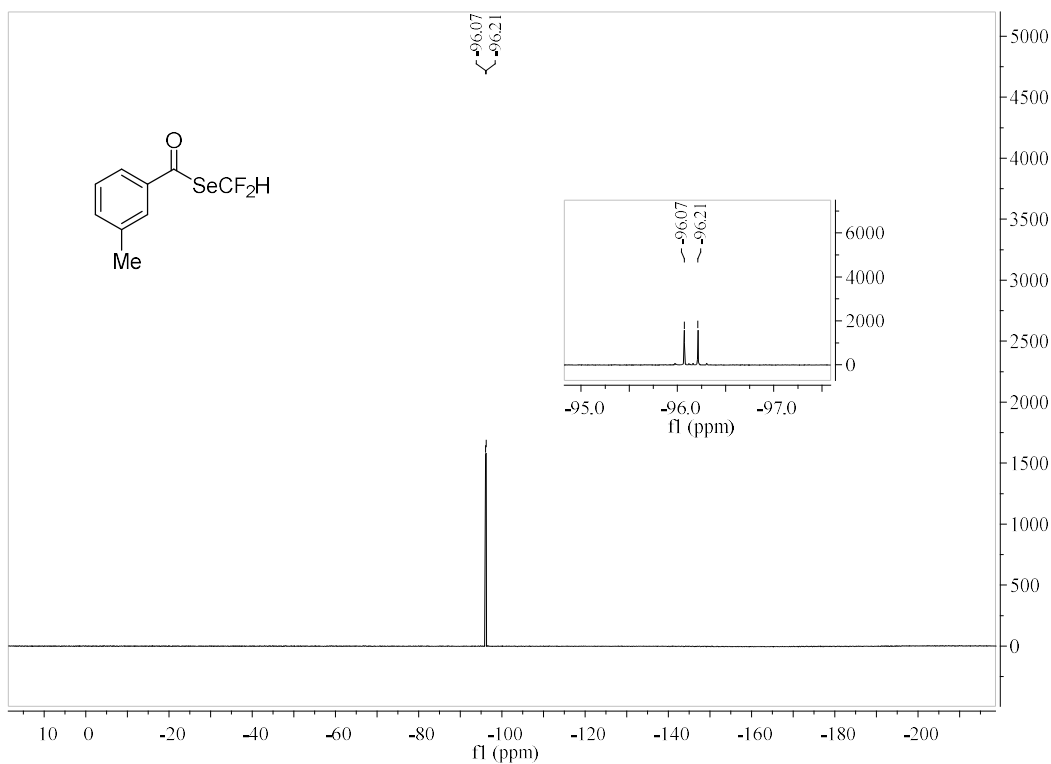

<sup>13</sup>C NMR spectra of compound **3p**

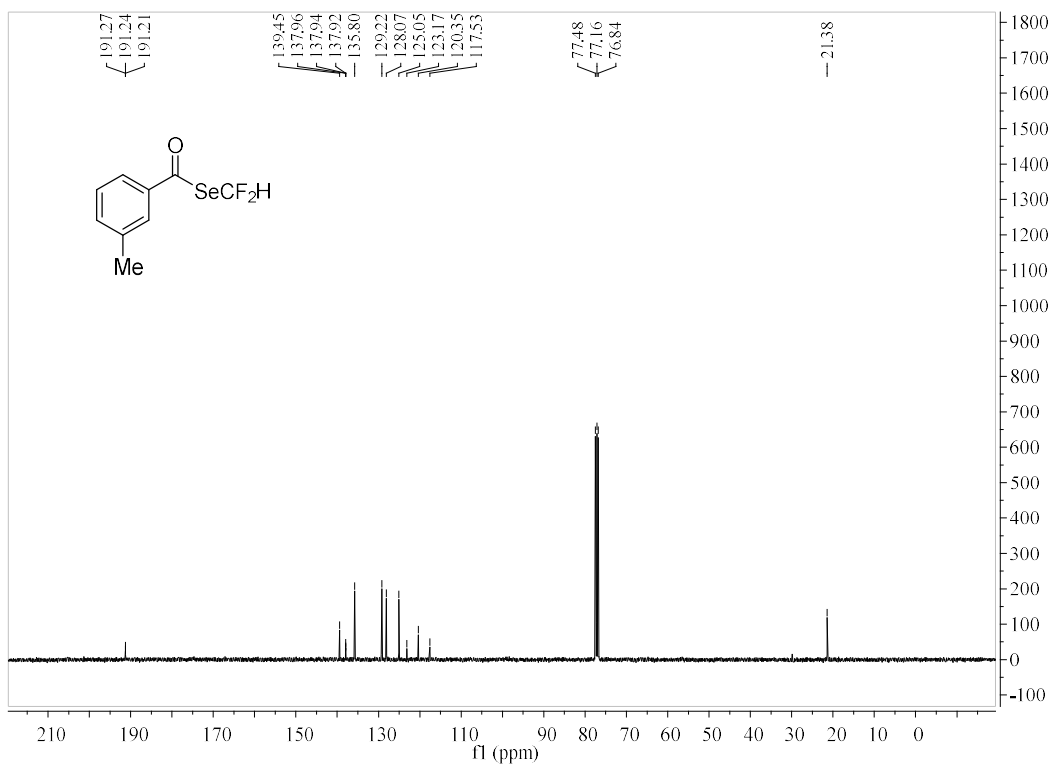

### <sup>1</sup>H NMR spectra of compound **3q**

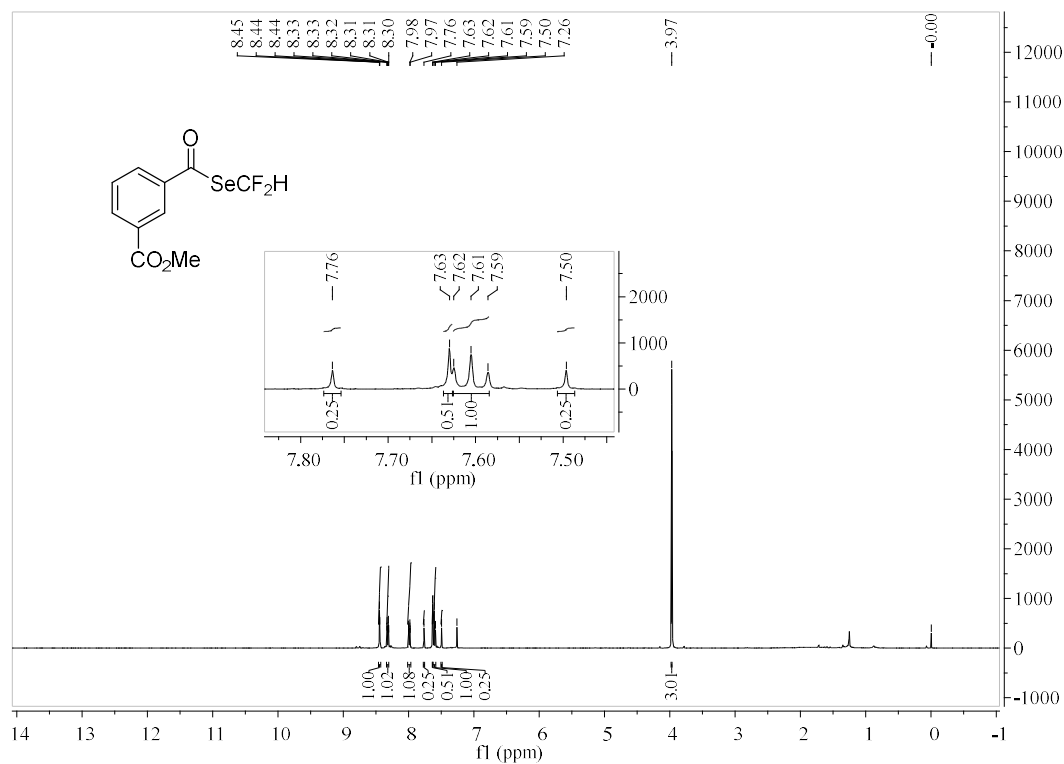

### <sup>19</sup>F NMR spectra of compound **3q**

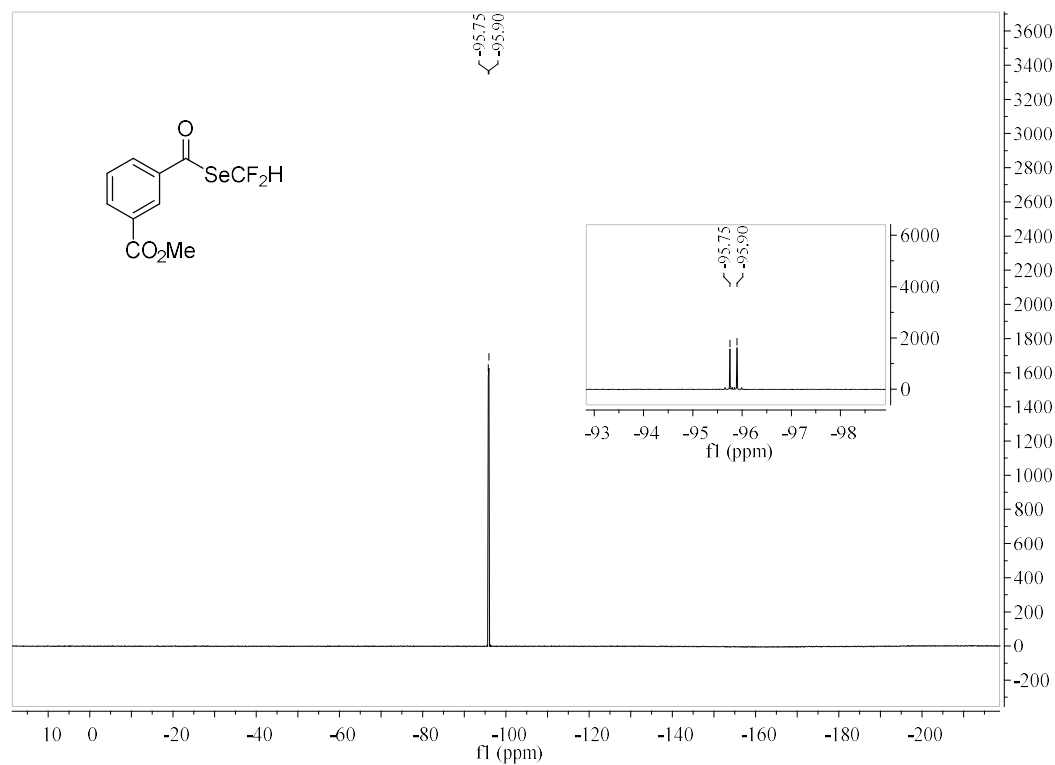

<sup>13</sup>C NMR spectra of compound **3q**

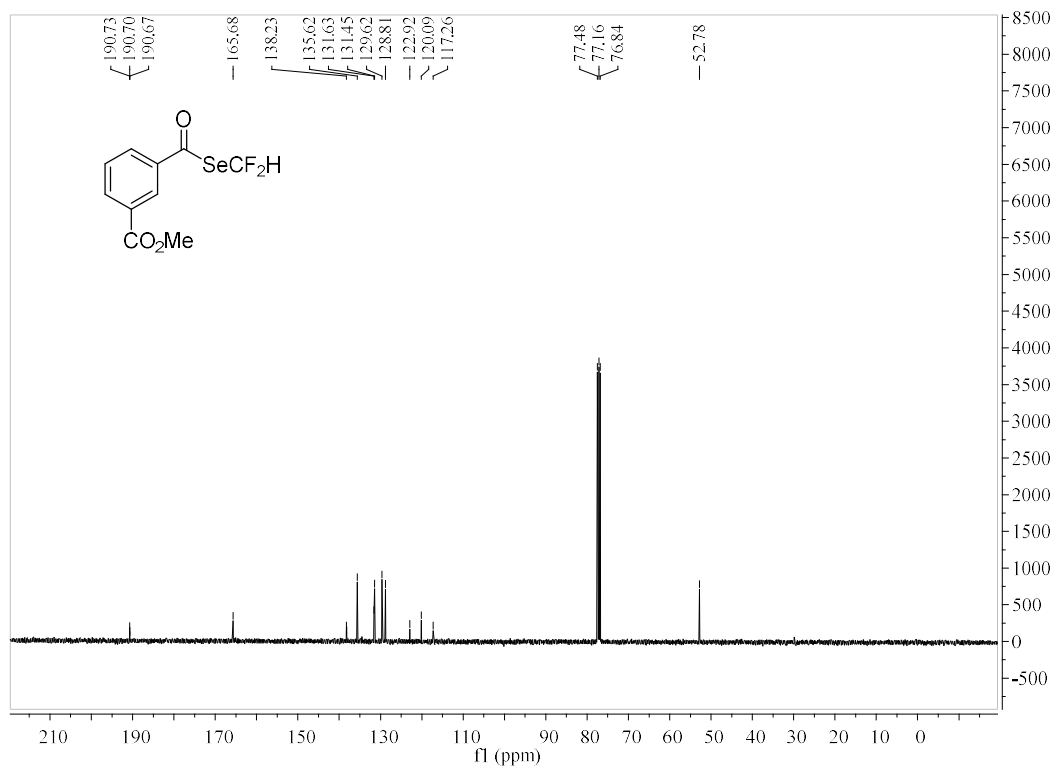

<sup>1</sup>H NMR spectra of compound **3r**

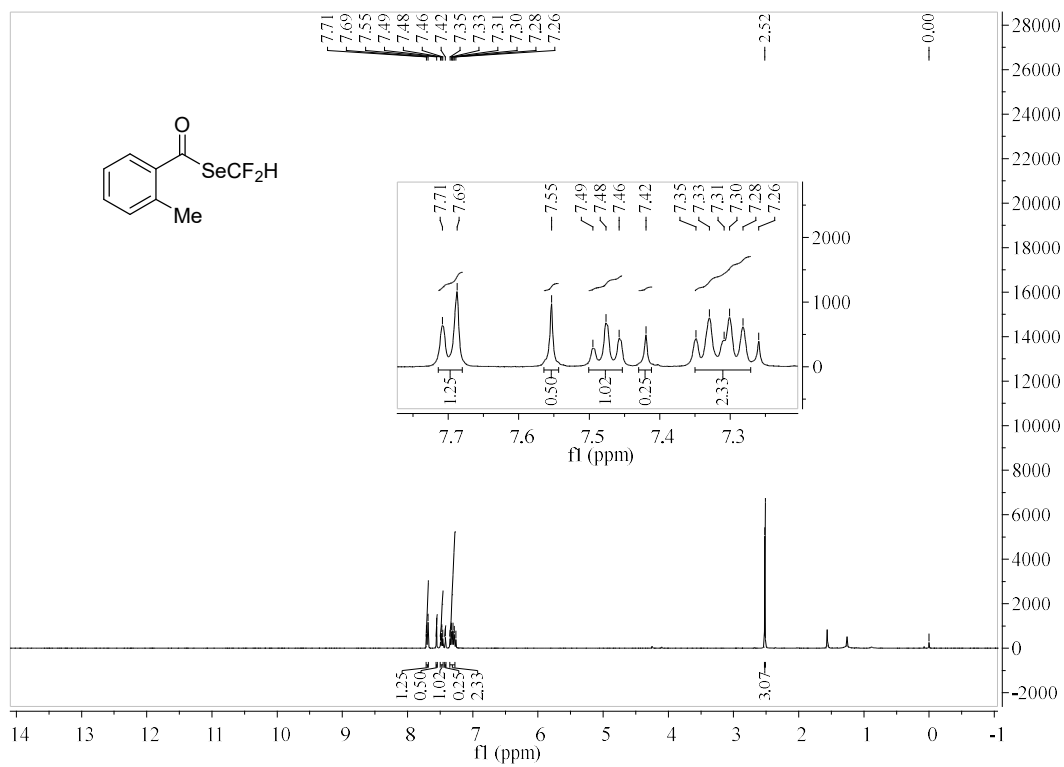



### $^{19}\text{F}$ NMR spectra of compound **3r**

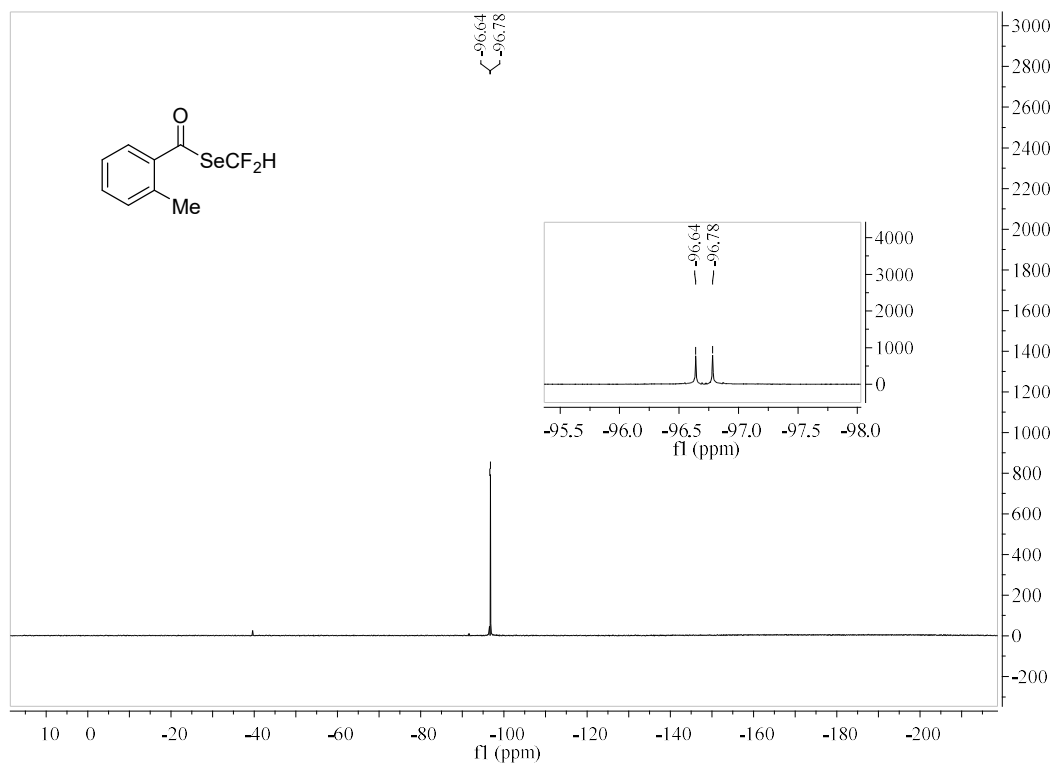

### $^{13}\text{C}$ NMR spectra of compound **3r**

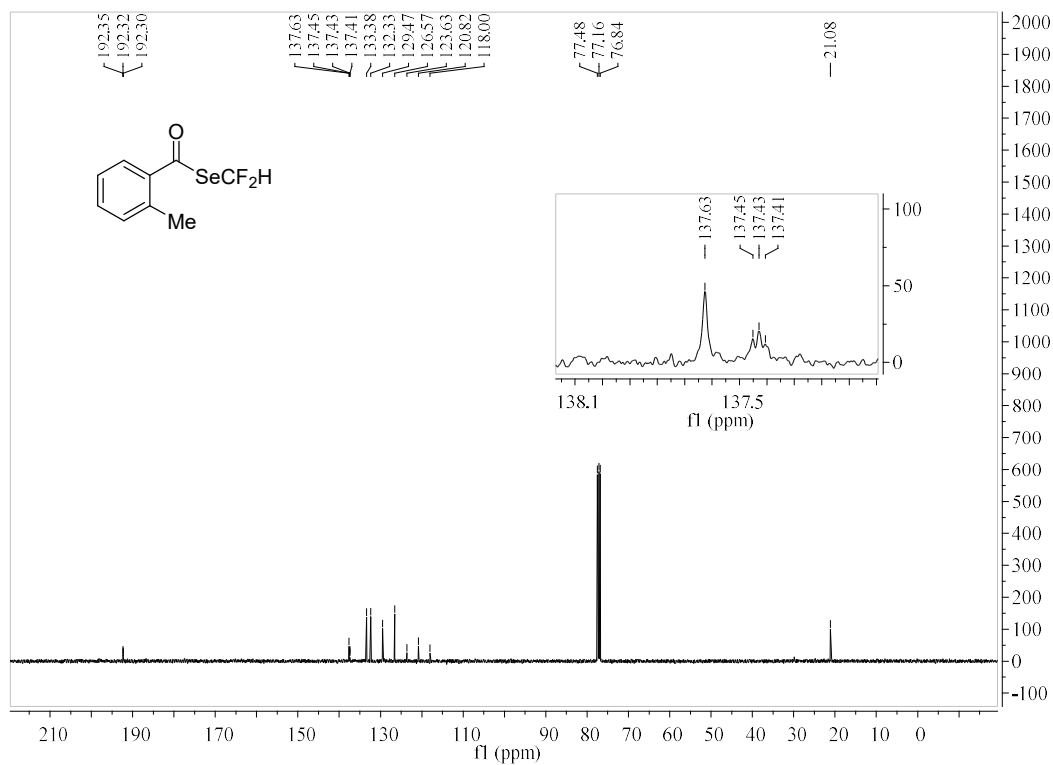

### <sup>1</sup>H NMR spectra of compound 3s

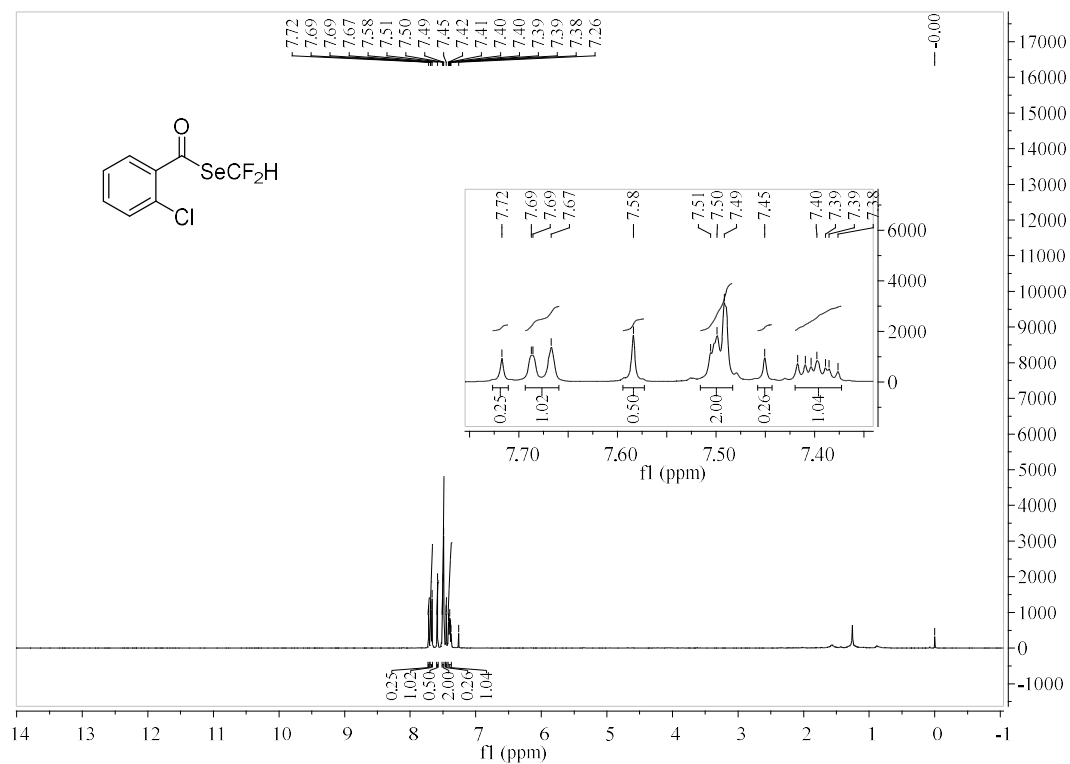

### <sup>19</sup>F NMR spectra of compound 3s

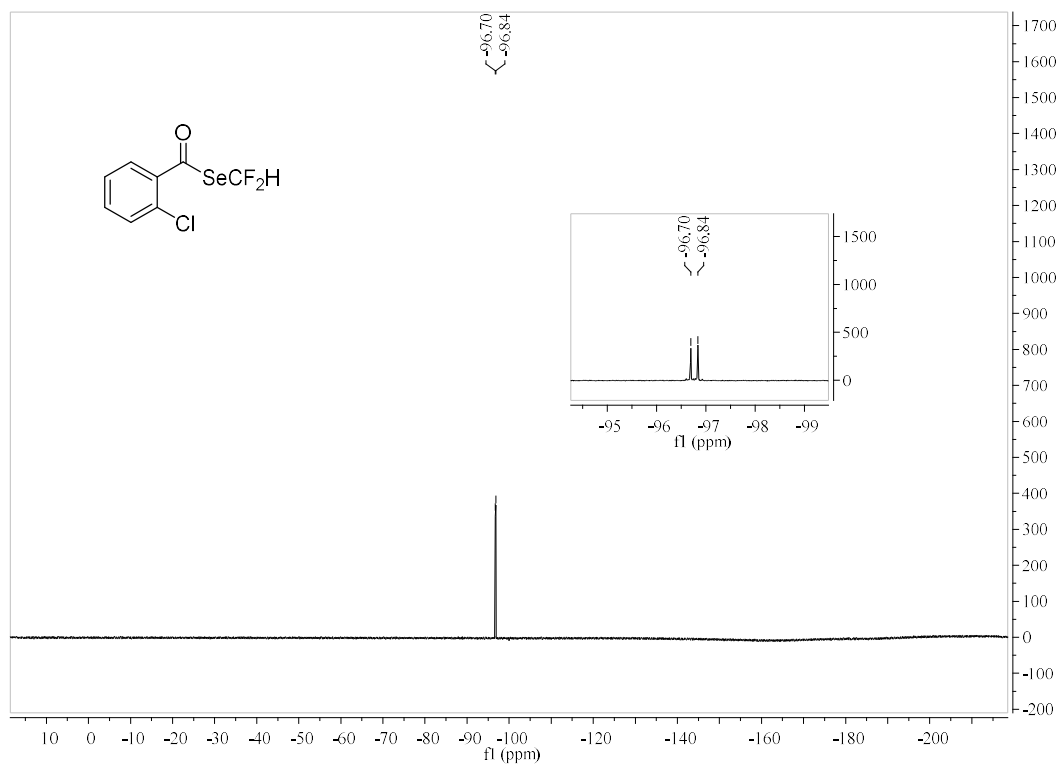

### $^{13}\text{C}$ NMR spectra of compound **3s**

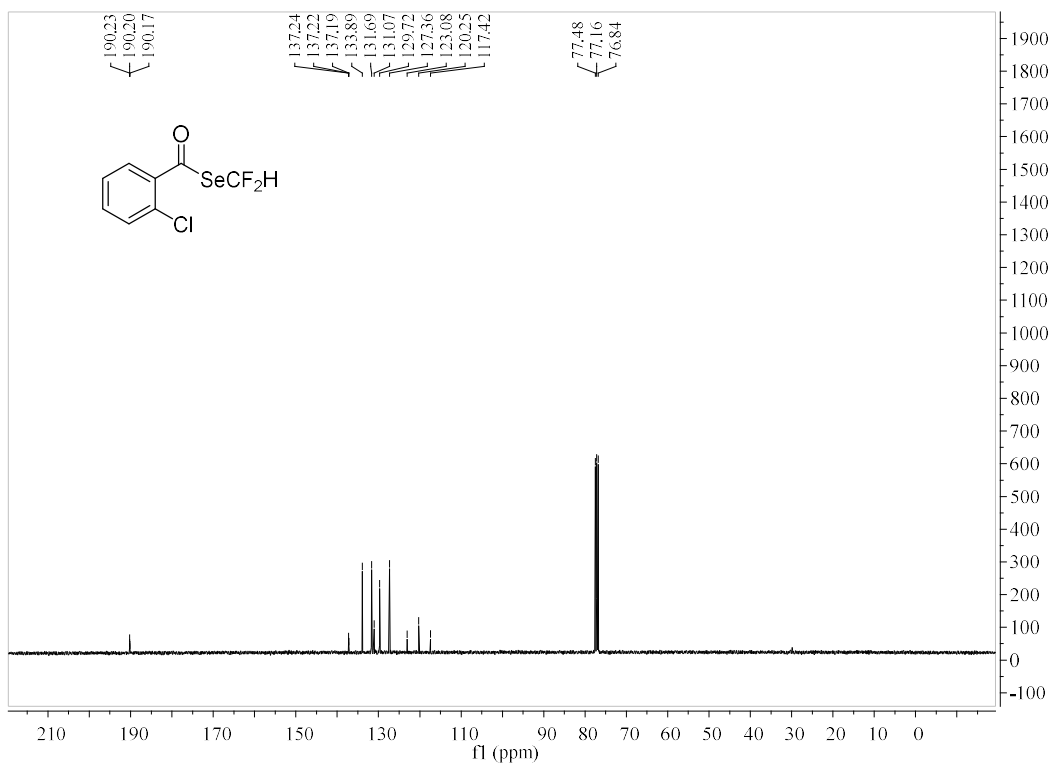

### $^1\text{H}$ NMR spectra of compound **3t**

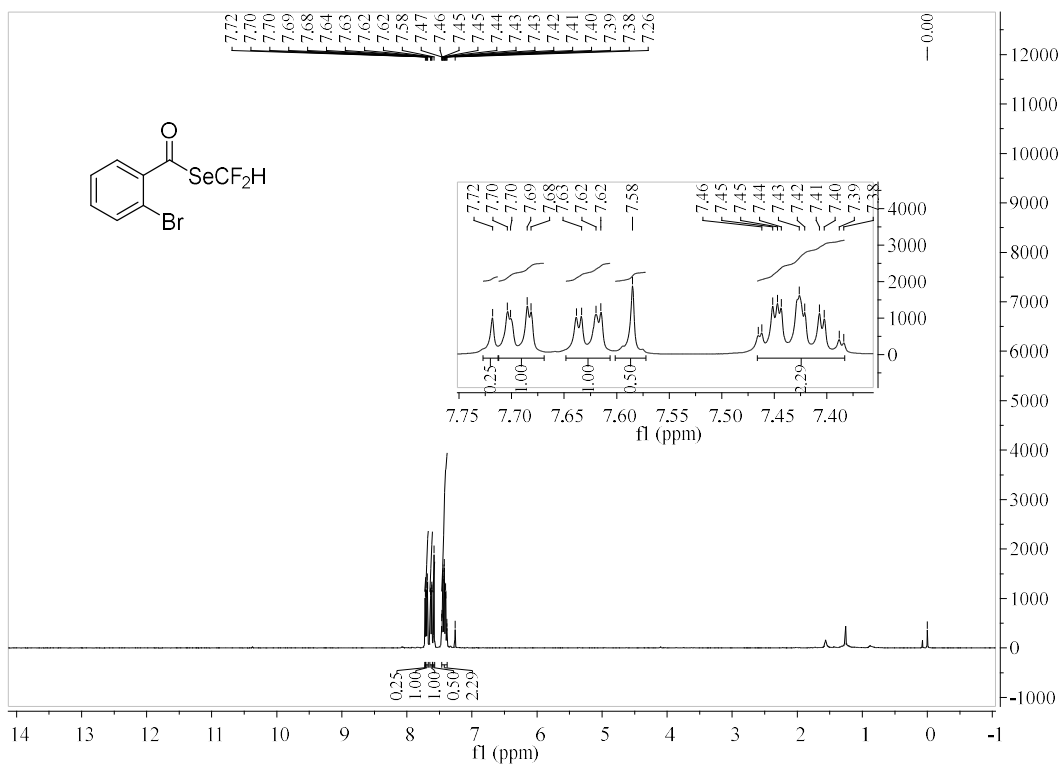

<sup>19</sup>F NMR spectra of compound **3t**

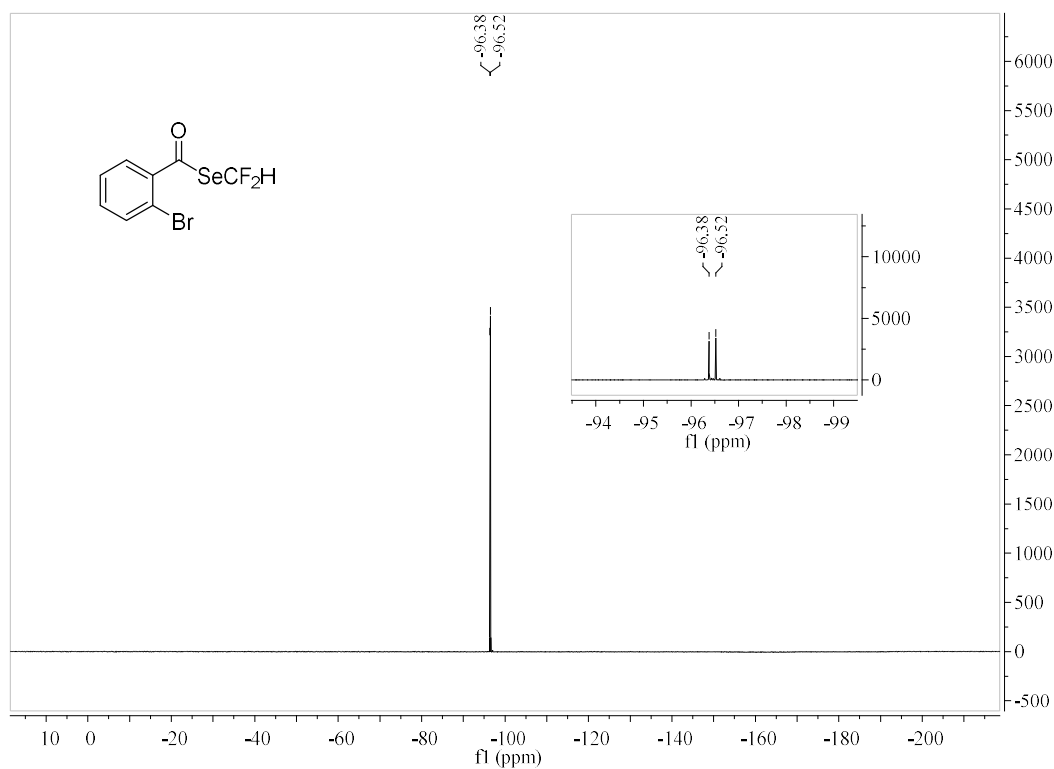

<sup>13</sup>C NMR spectra of compound **3t**

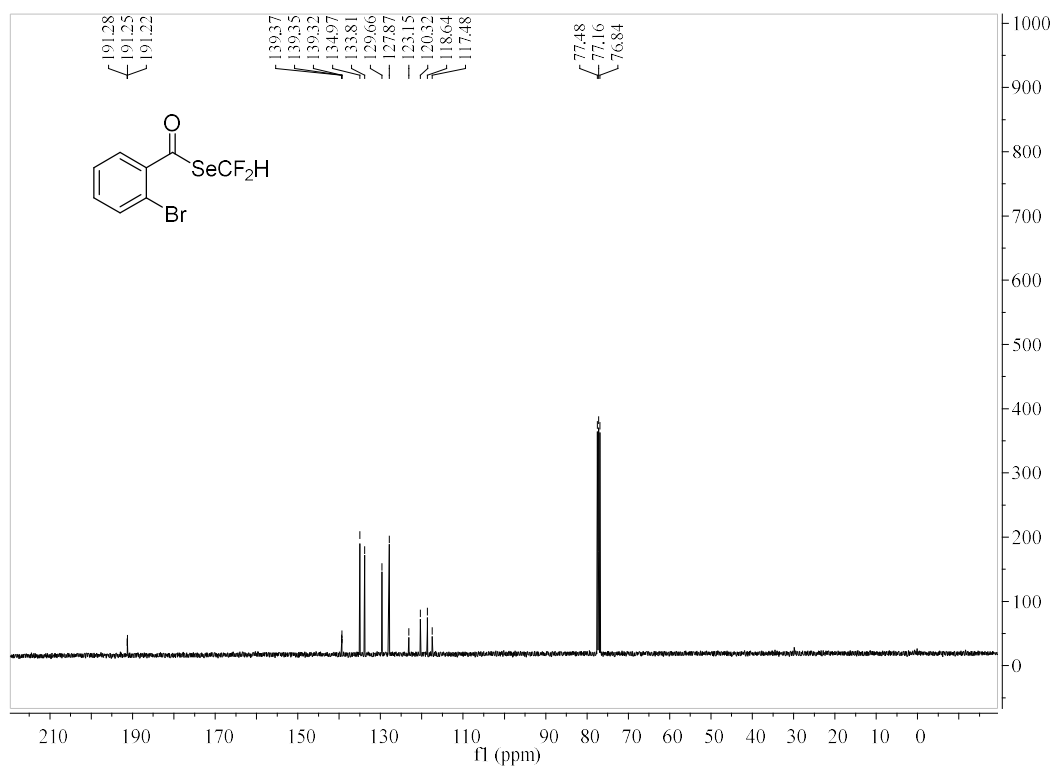

### <sup>1</sup>H NMR spectra of compound **3u**

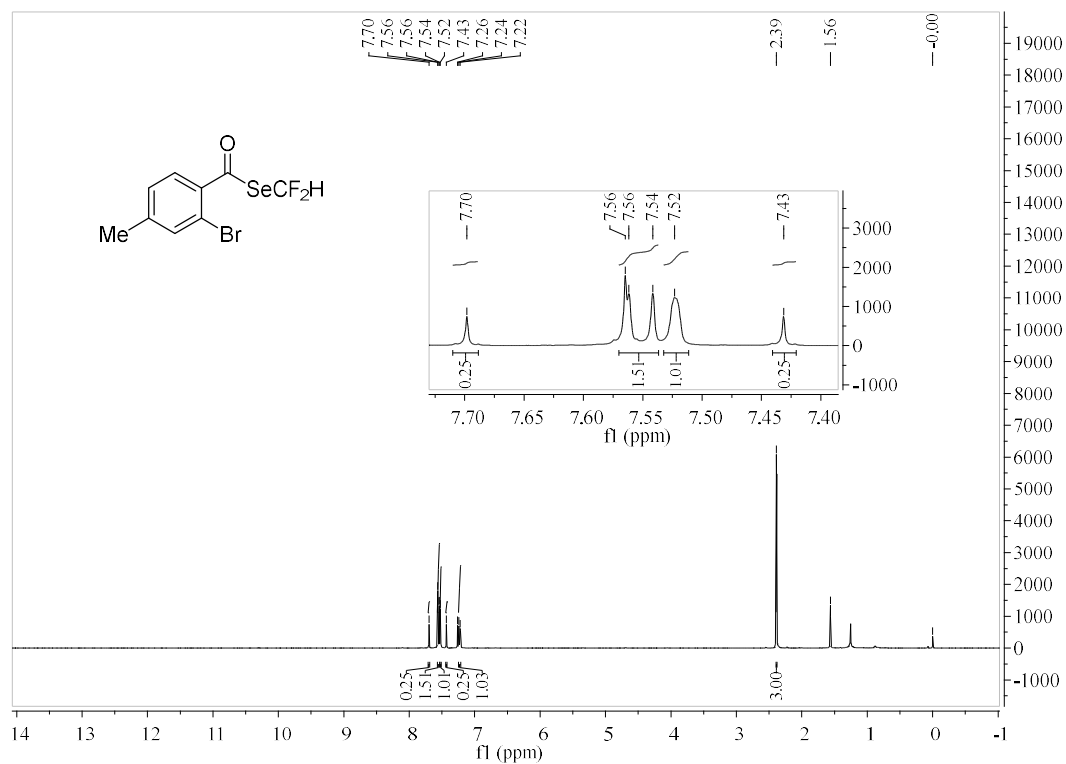

### <sup>19</sup>F NMR spectra of compound **3u**

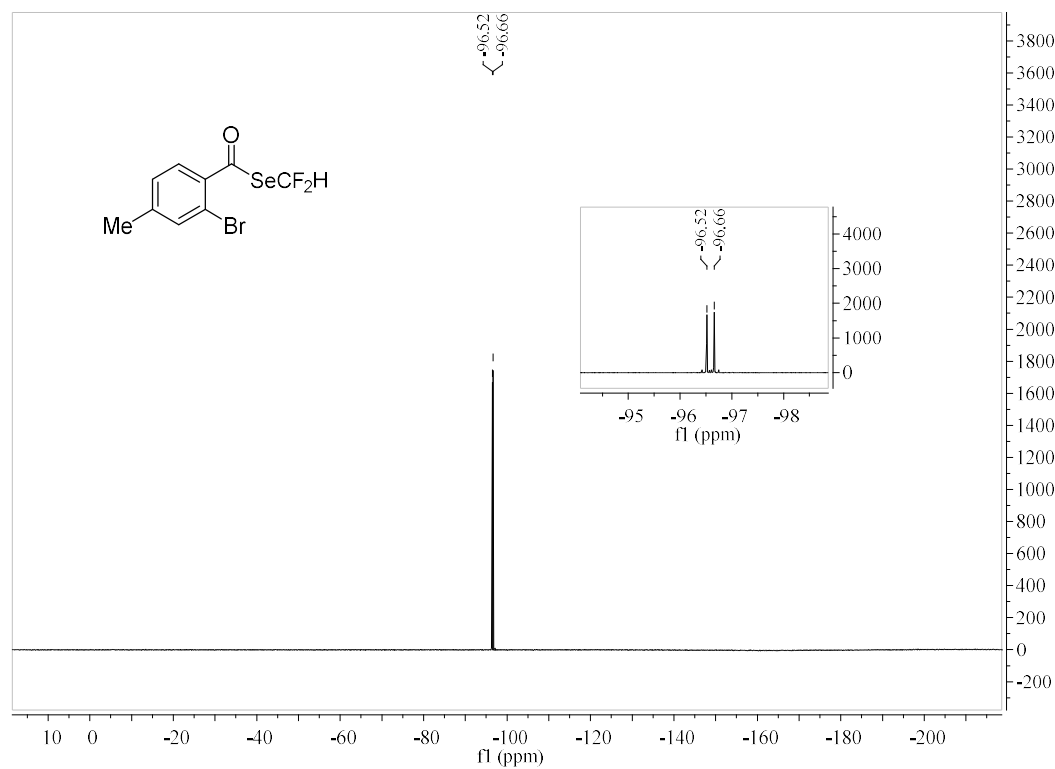

<sup>13</sup>C NMR spectra of compound **3u**

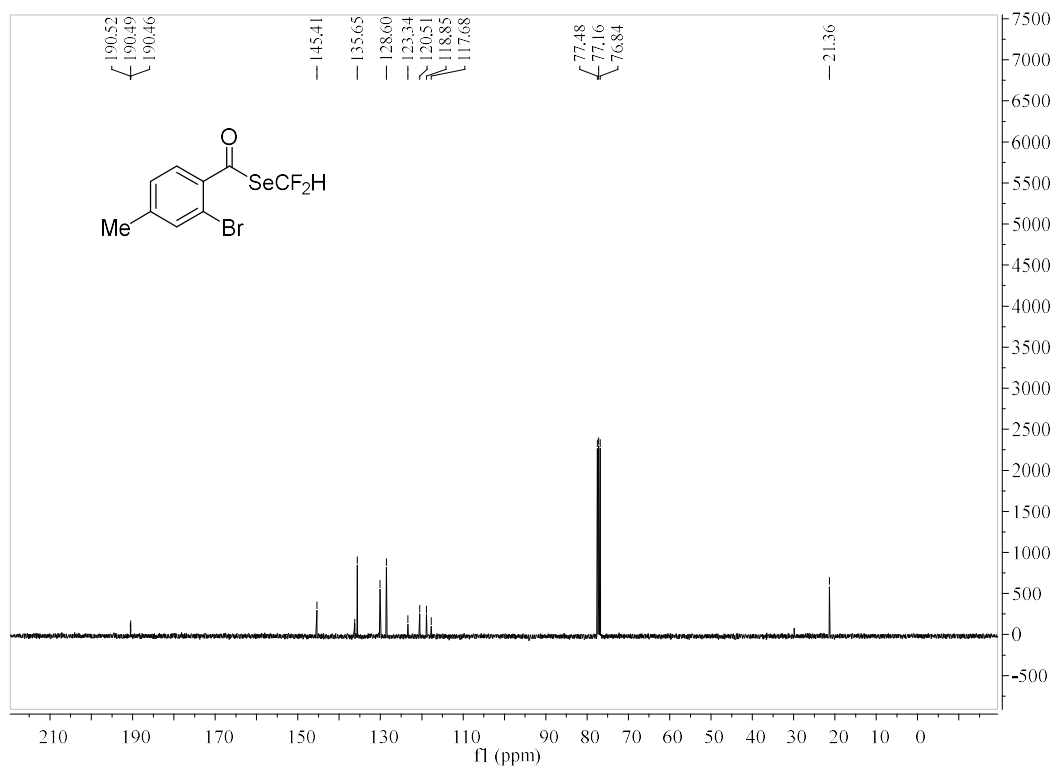

<sup>1</sup>H NMR spectra of compound **3v**

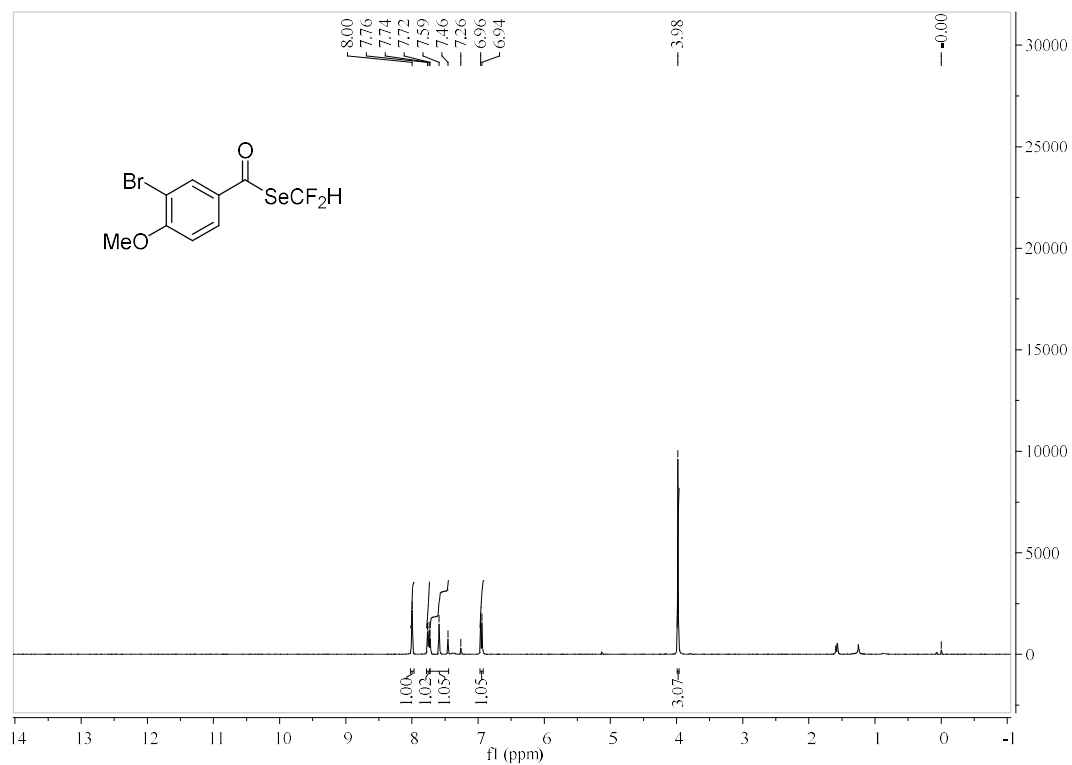

<sup>19</sup>F NMR spectra of compound **3v**

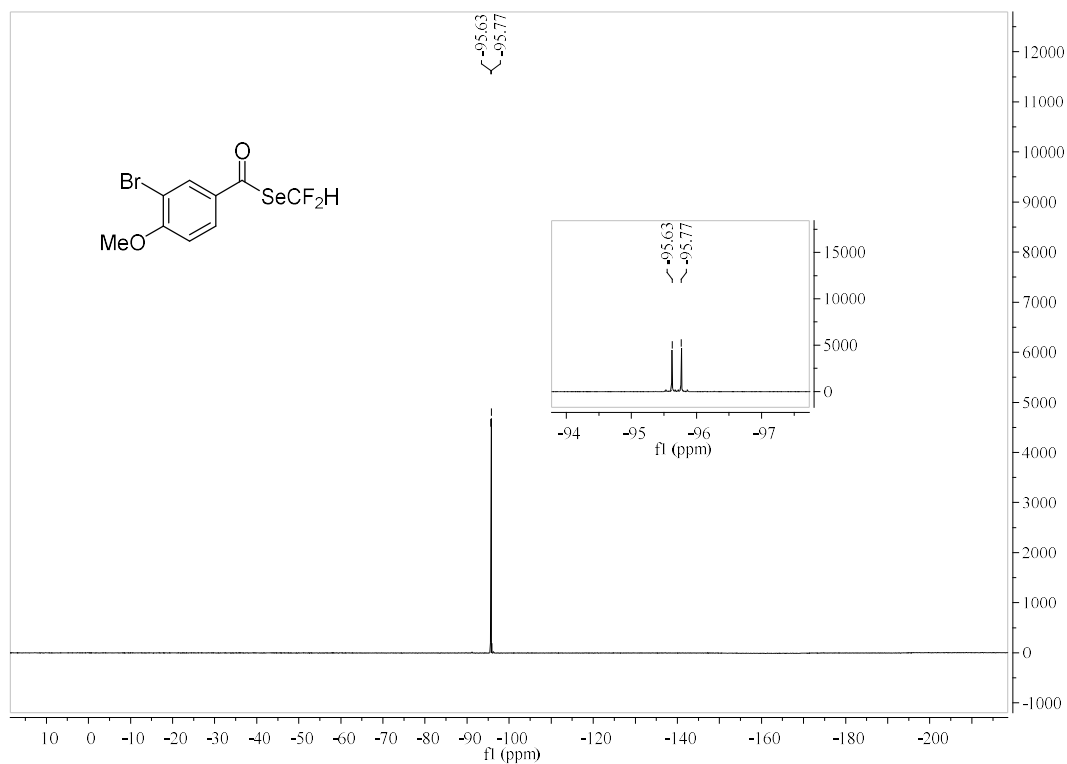

<sup>13</sup>C NMR spectra of compound **3v**

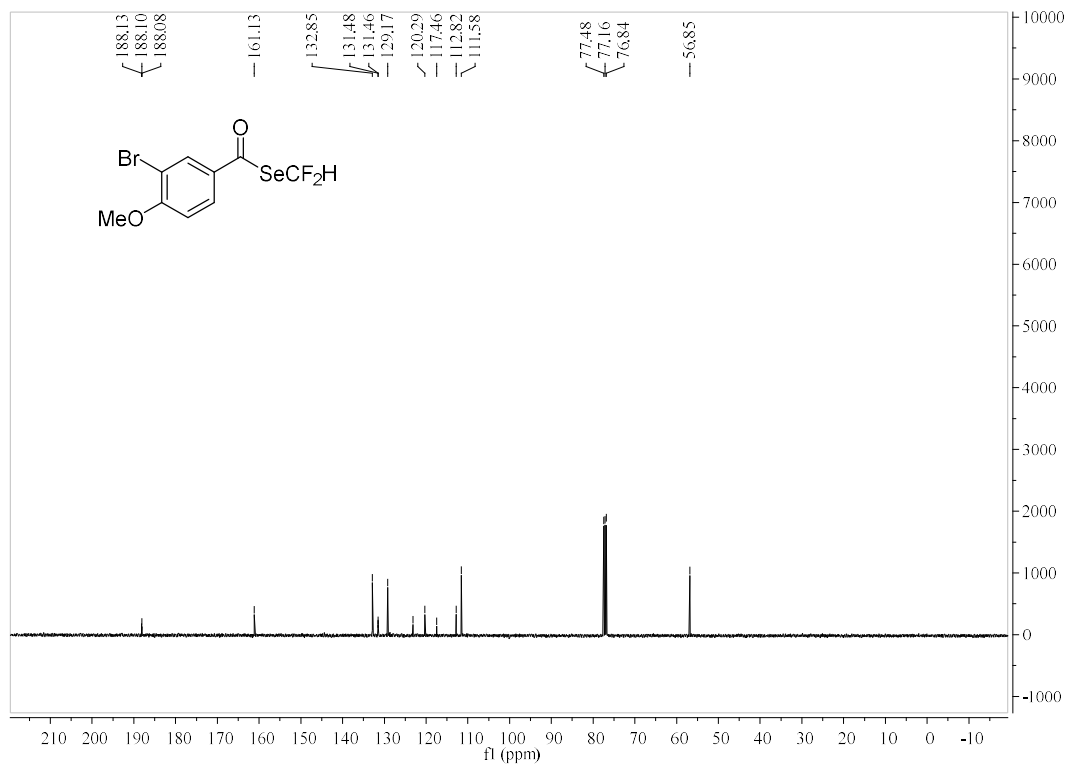

### <sup>1</sup>H NMR spectra of compound 3w

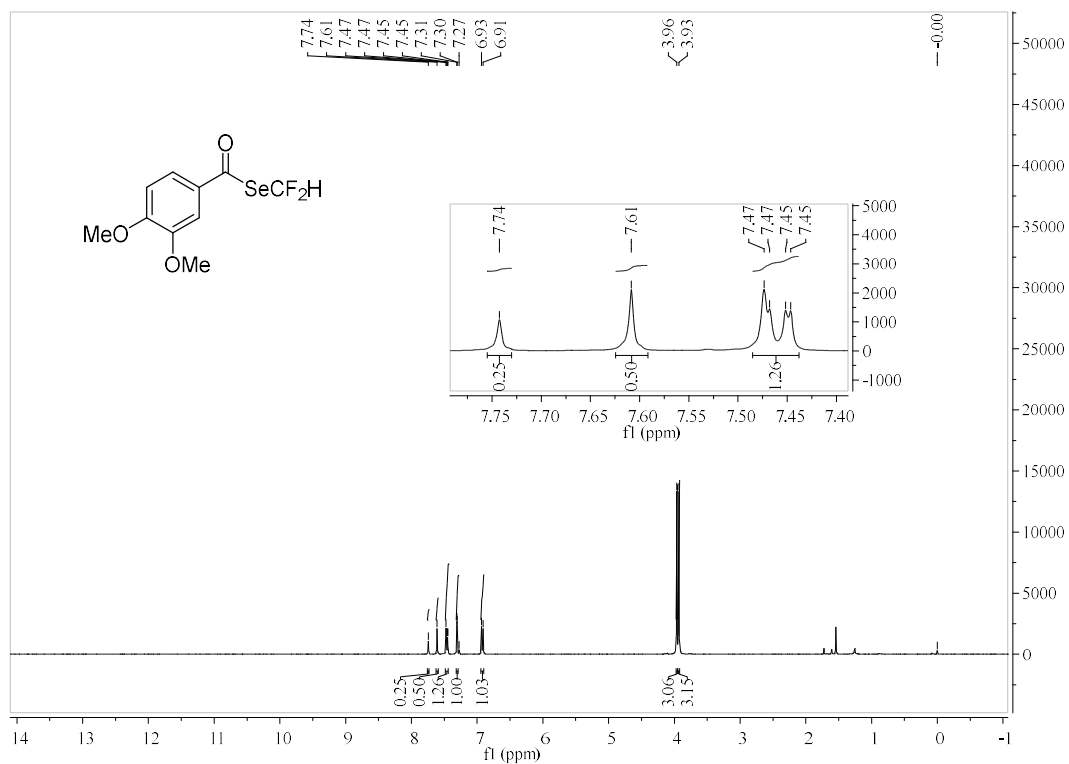

### <sup>19</sup>F NMR spectra of compound 3w

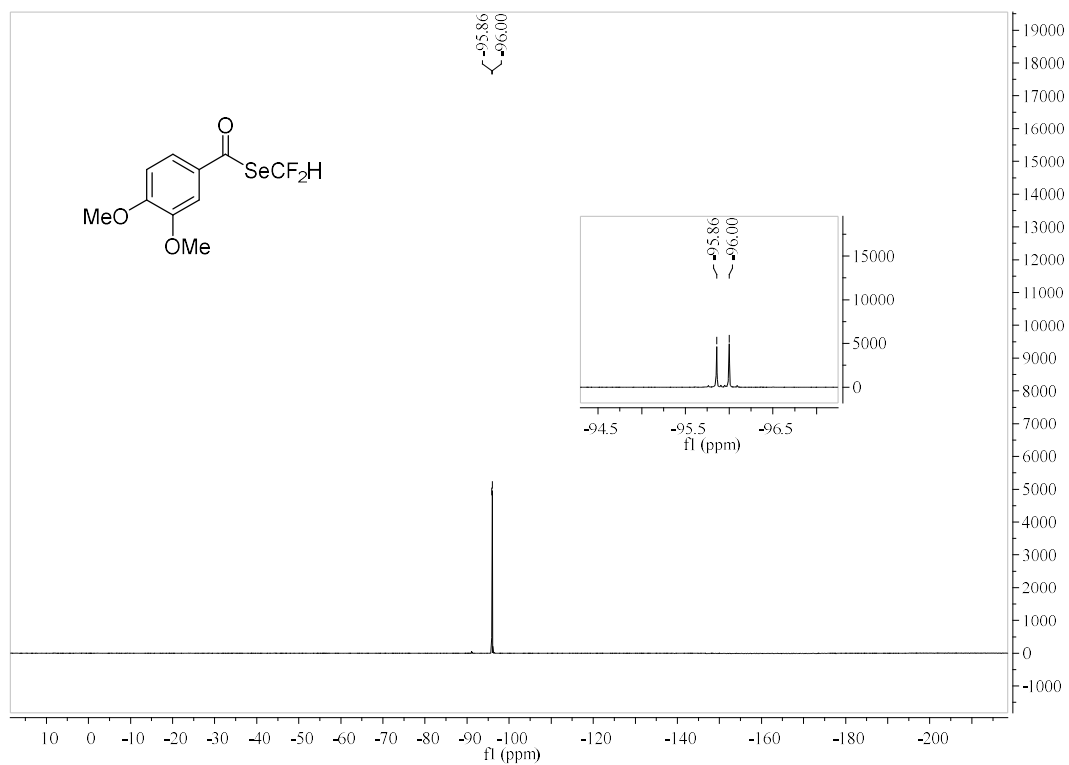



### <sup>13</sup>C NMR spectra of compound 3w

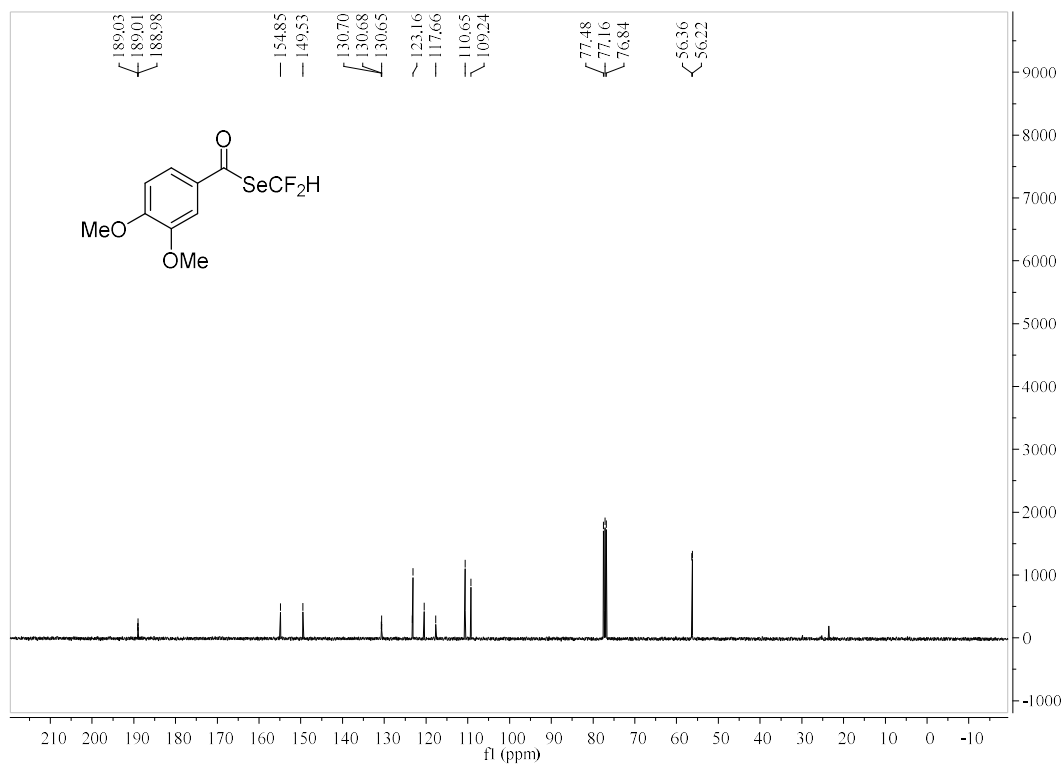

### <sup>1</sup>H NMR spectra of compound 3x

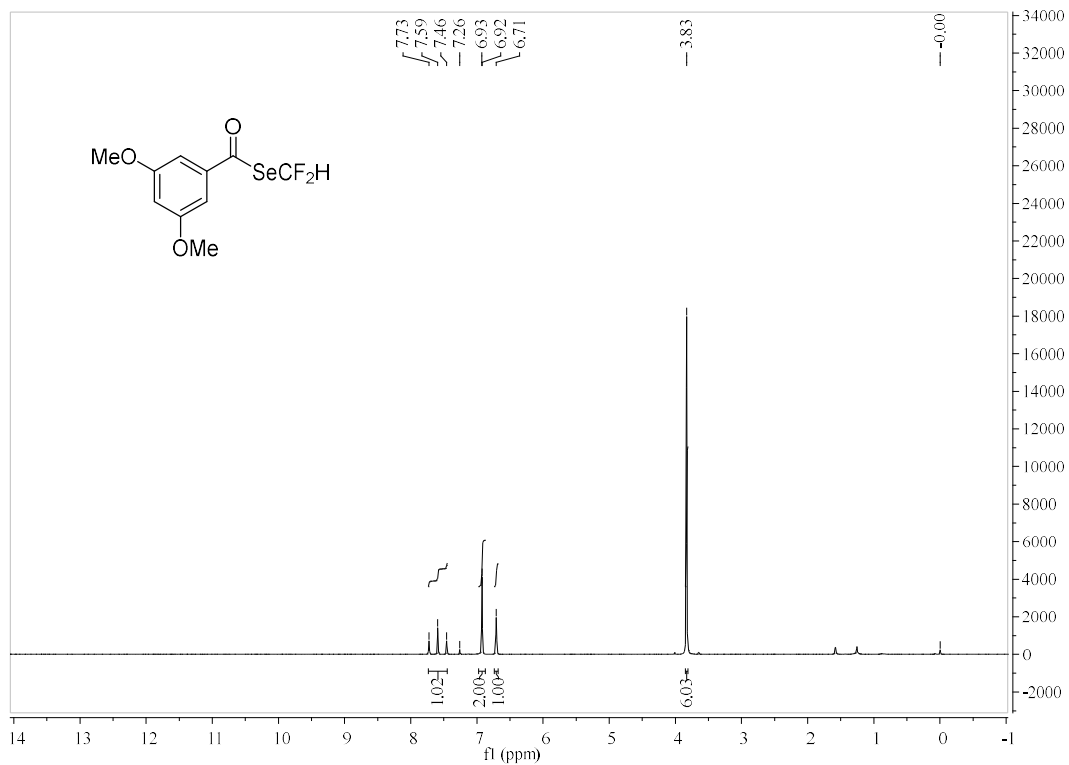

### <sup>19</sup>F NMR spectra of compound 3x

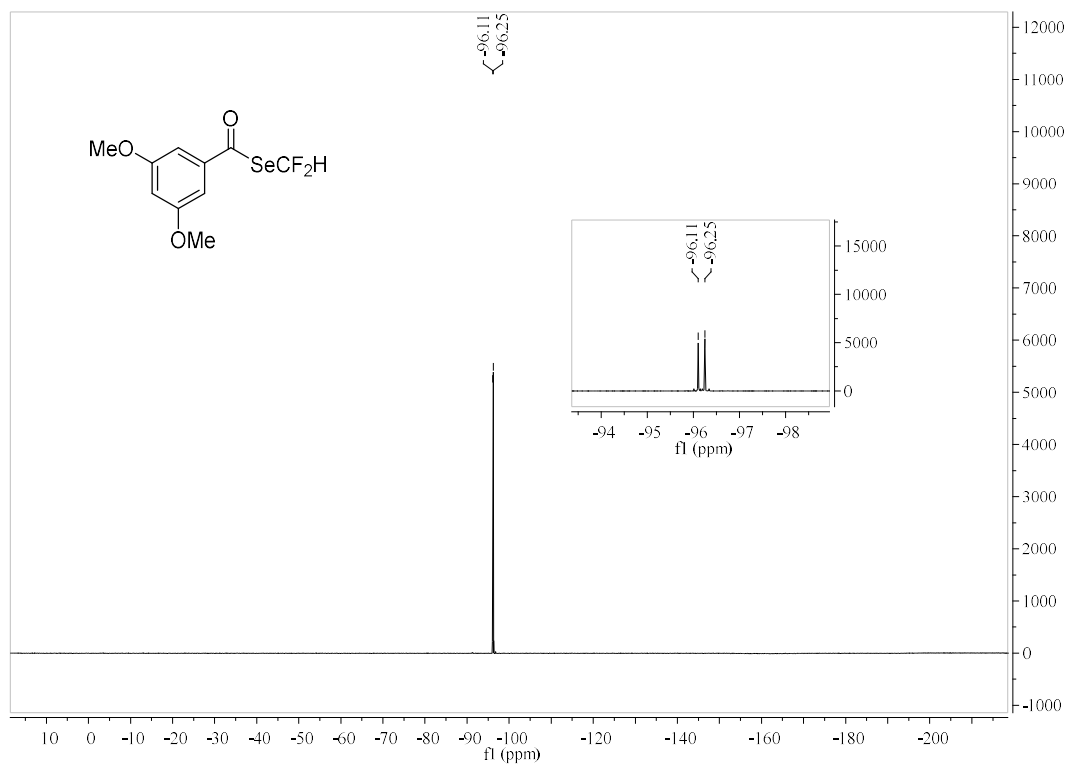

### <sup>13</sup>C NMR spectra of compound 3x

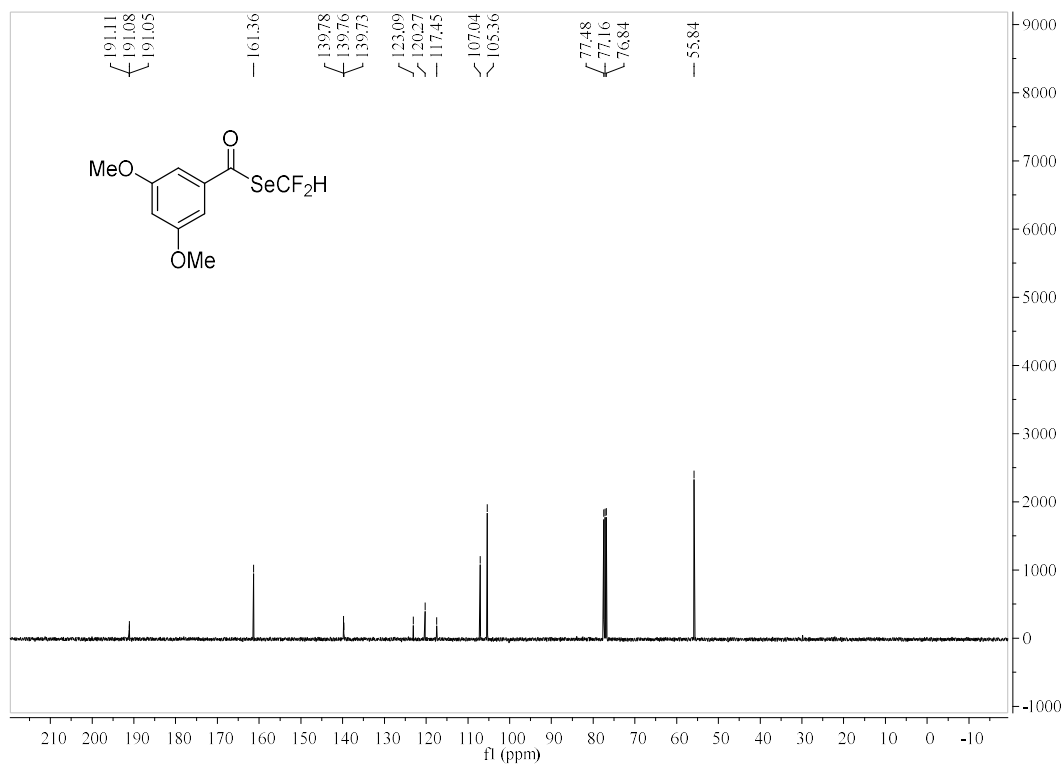

### <sup>1</sup>H NMR spectra of compound 3aa

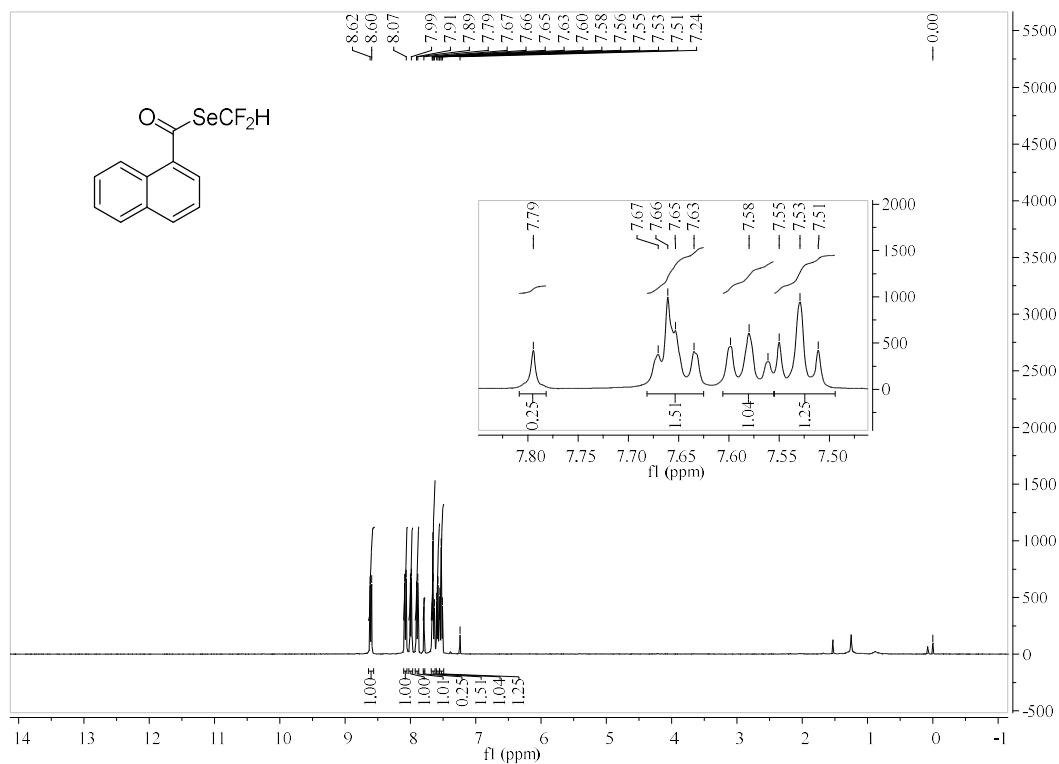

### <sup>19</sup>F NMR spectra of compound 3aa

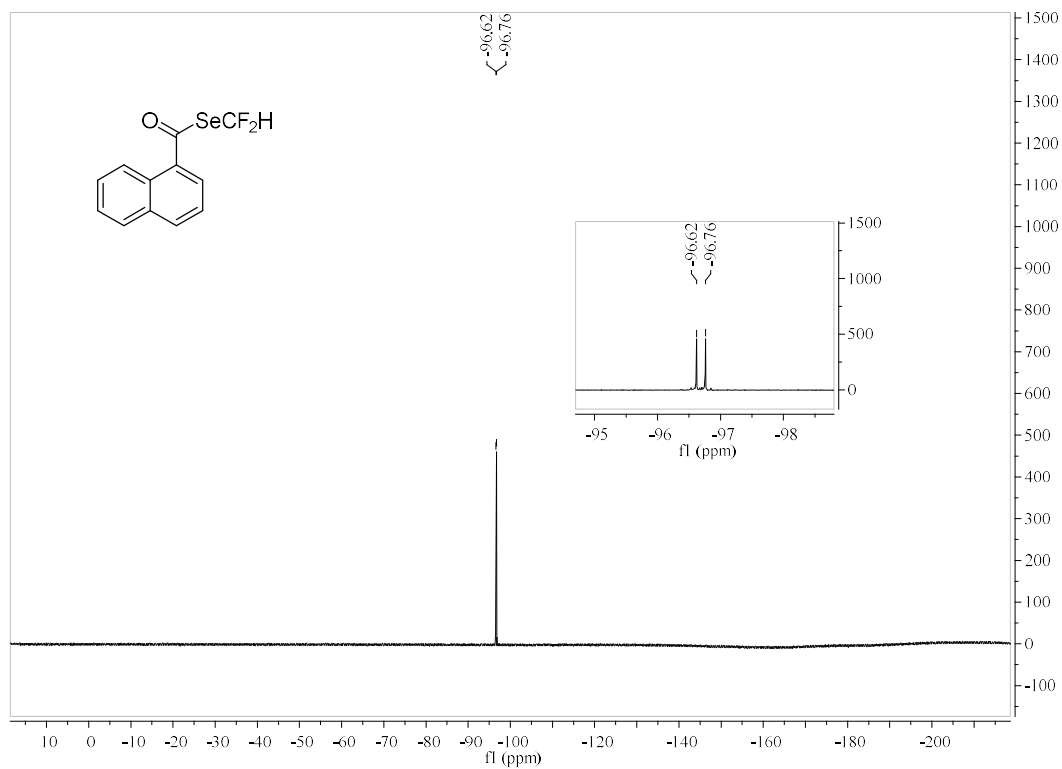

### <sup>13</sup>C NMR spectra of compound **3aa**

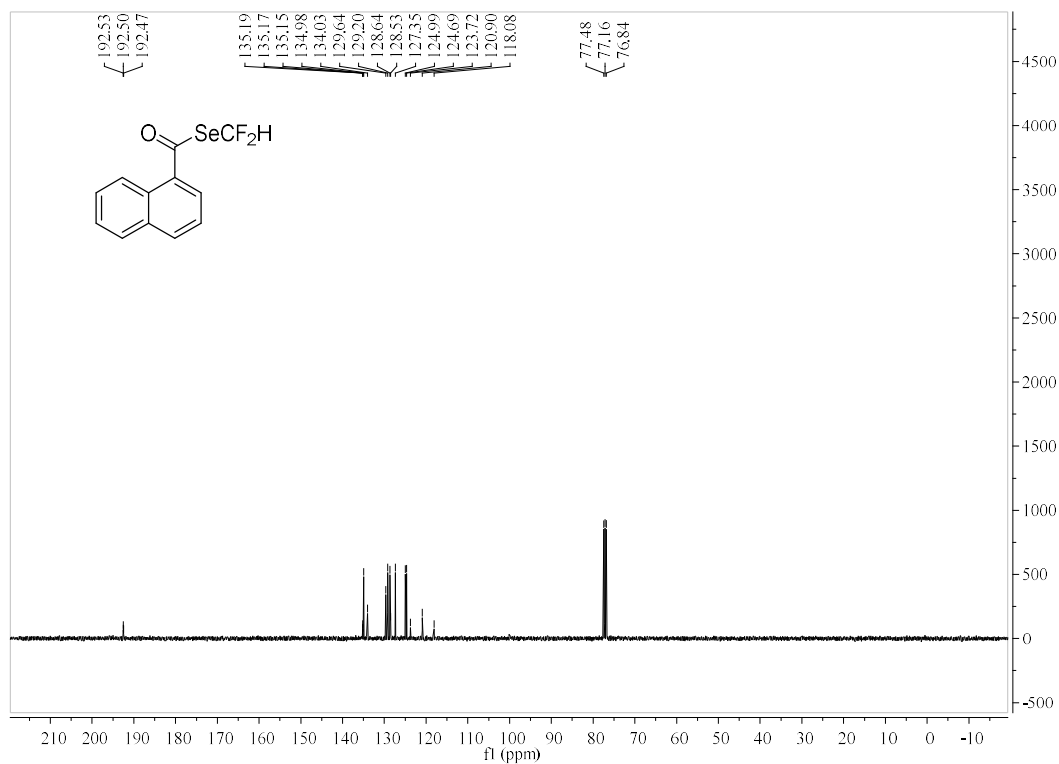

### <sup>1</sup>H NMR spectra of compound **3ab**

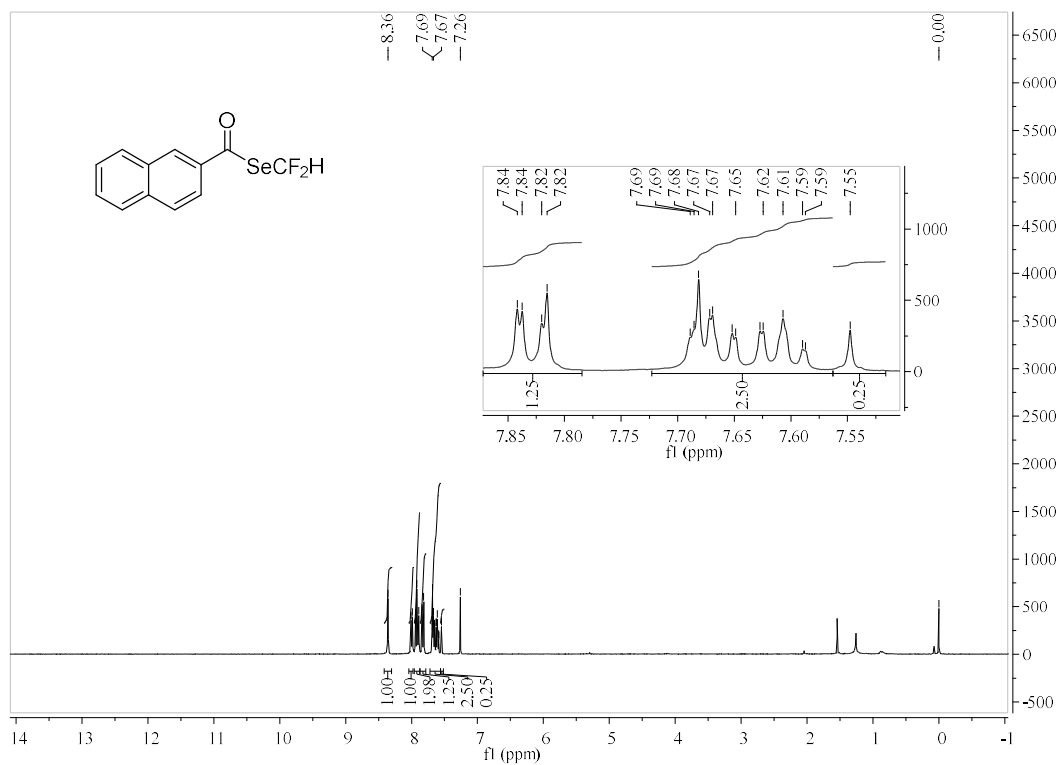

<sup>19</sup>F NMR spectra of compound **3ab**

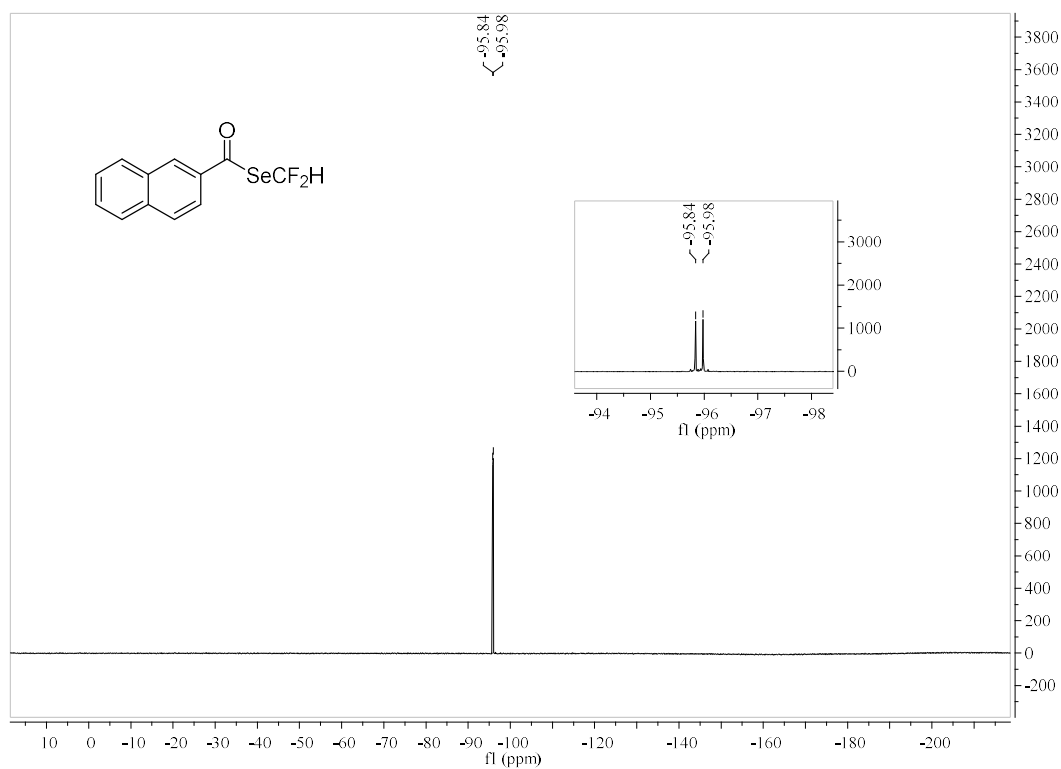

<sup>13</sup>C NMR spectra of compound **3ab**

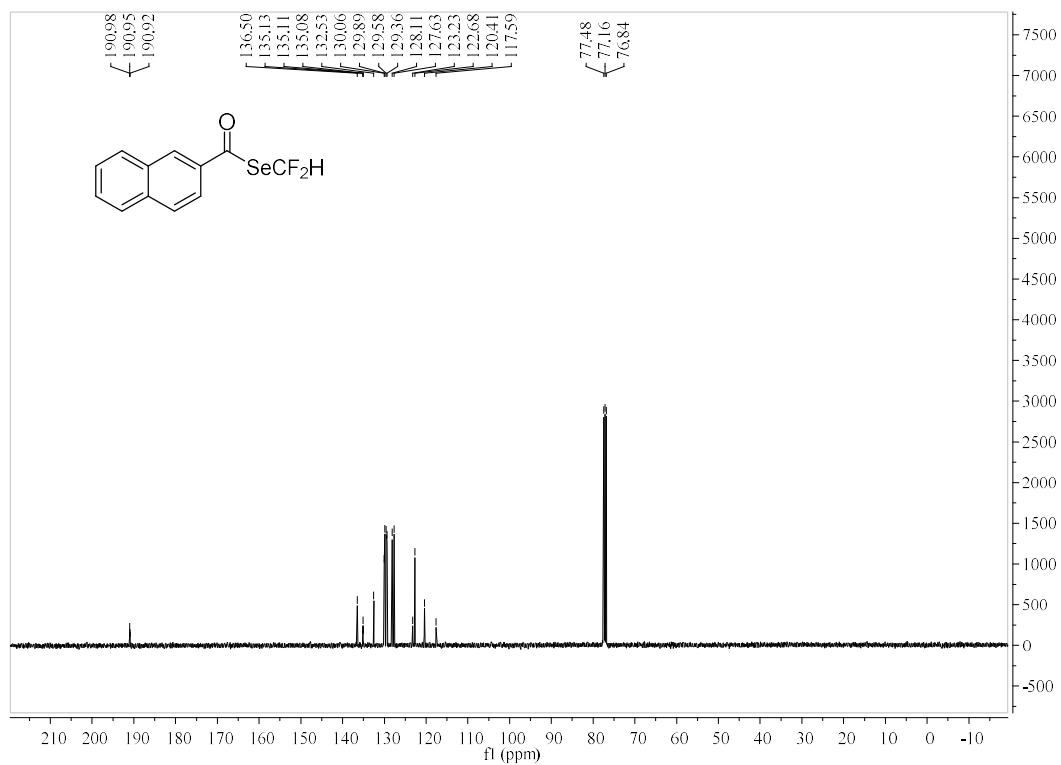

### $^1\text{H}$ NMR spectra of compound **3ac**

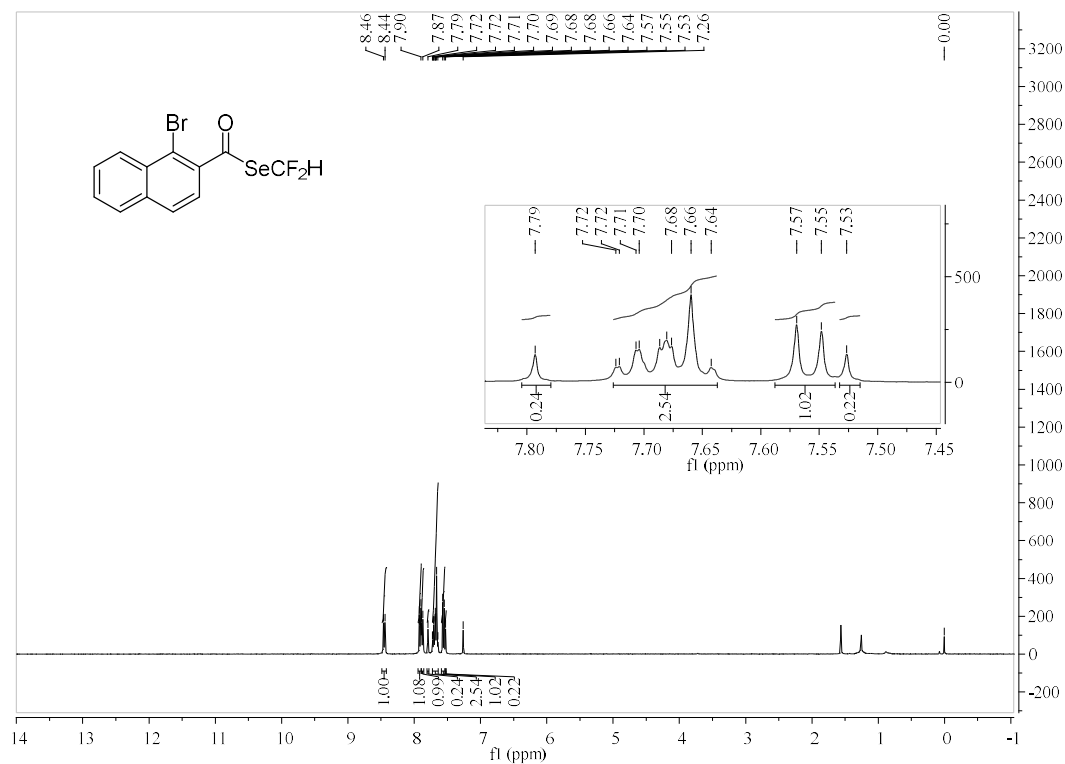

### $^{19}\text{F}$ NMR spectra of compound **3ac**

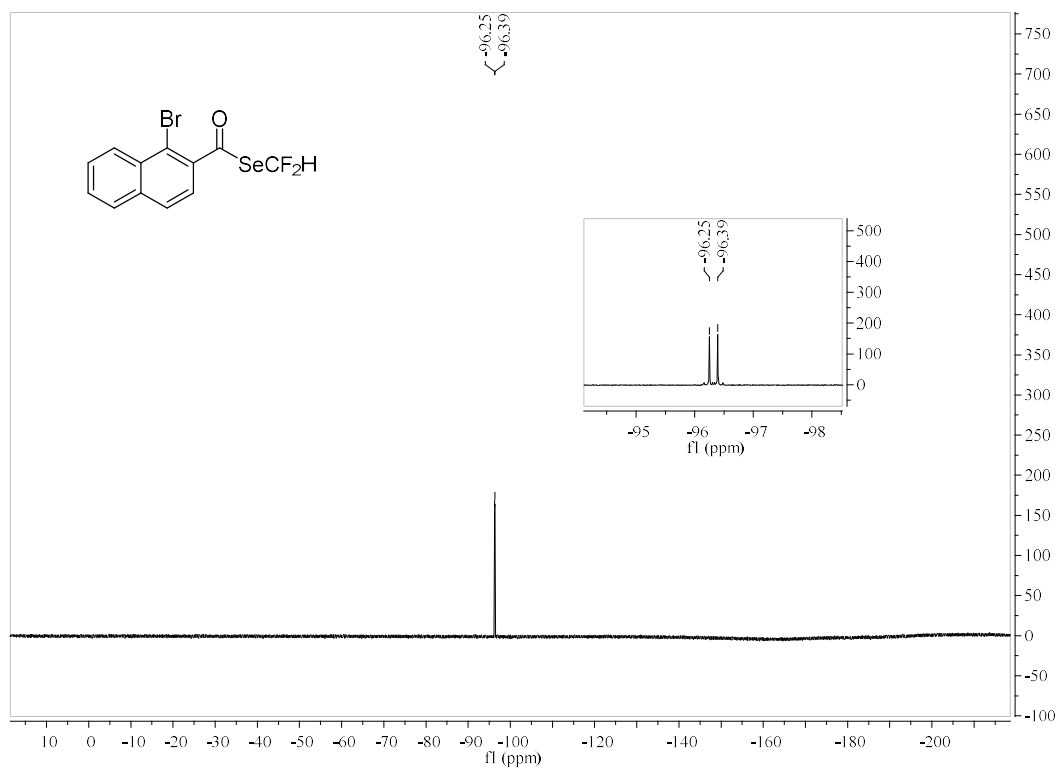

<sup>13</sup>C NMR spectra of compound **3ac**

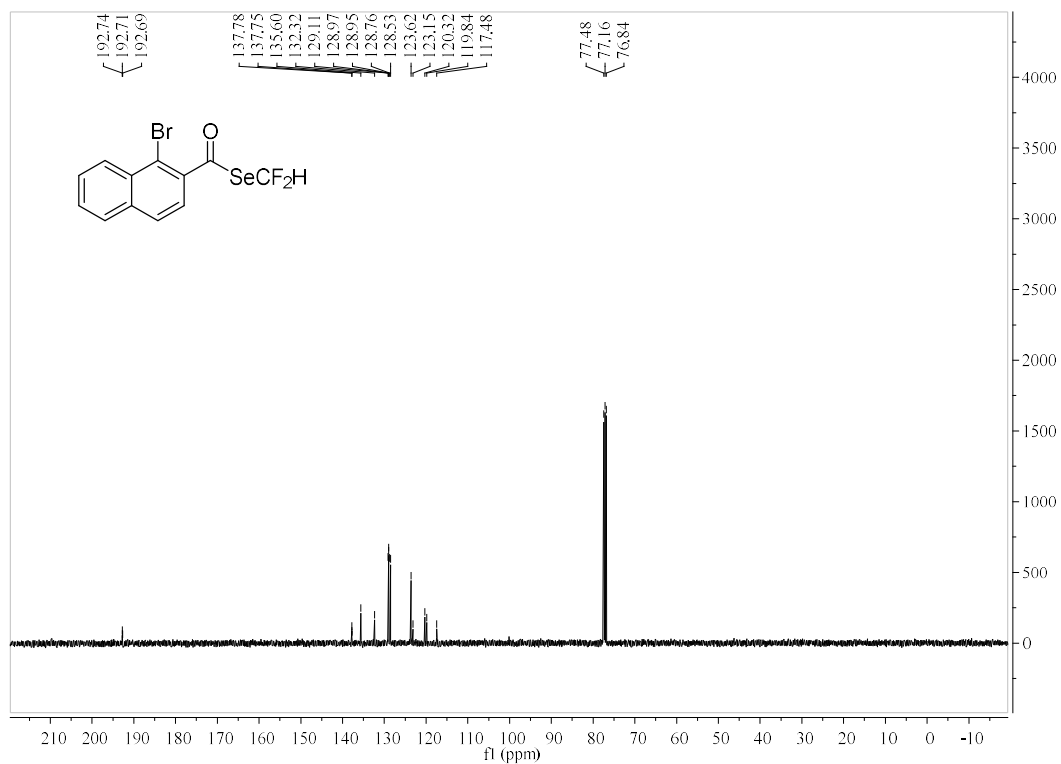

<sup>1</sup>H NMR spectra of compound **3ad**

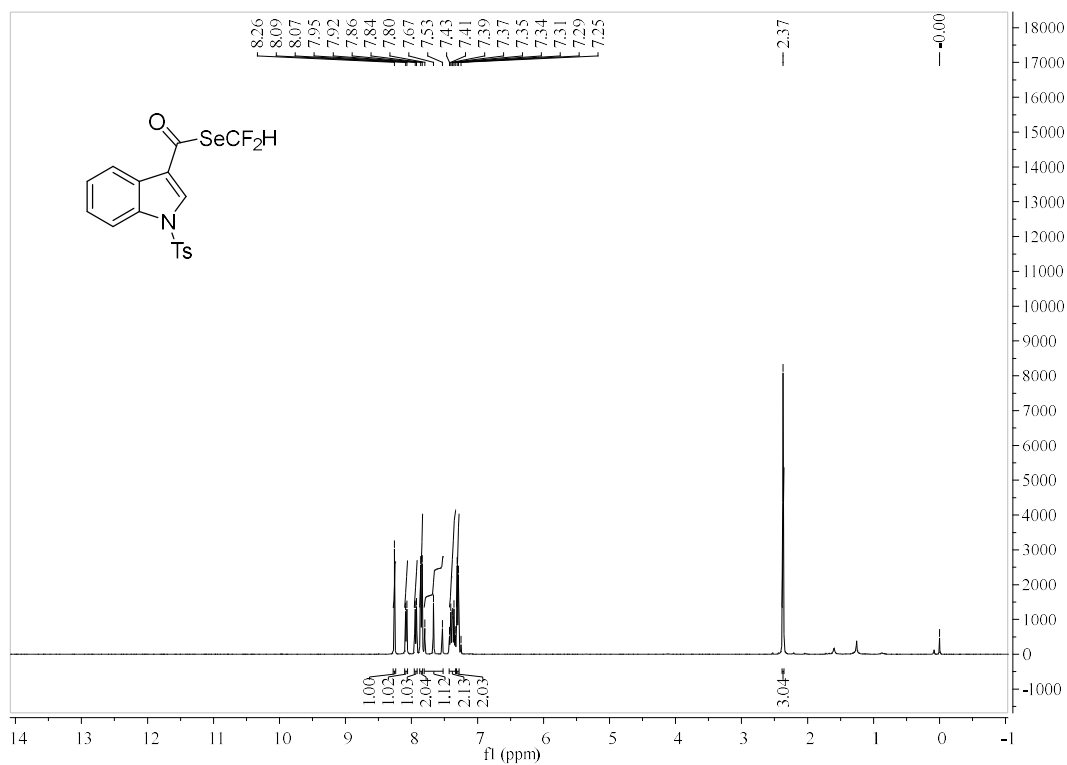

### <sup>19</sup>F NMR spectra of compound **3ad**

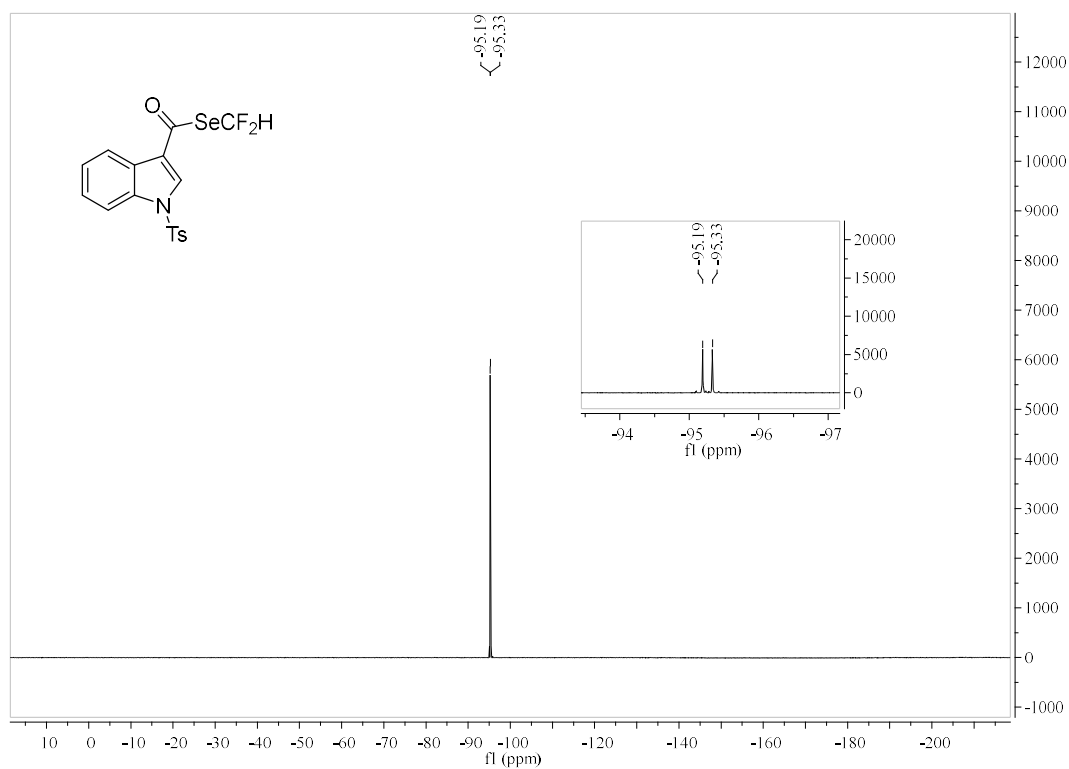

### <sup>13</sup>C NMR spectra of compound **3ad**

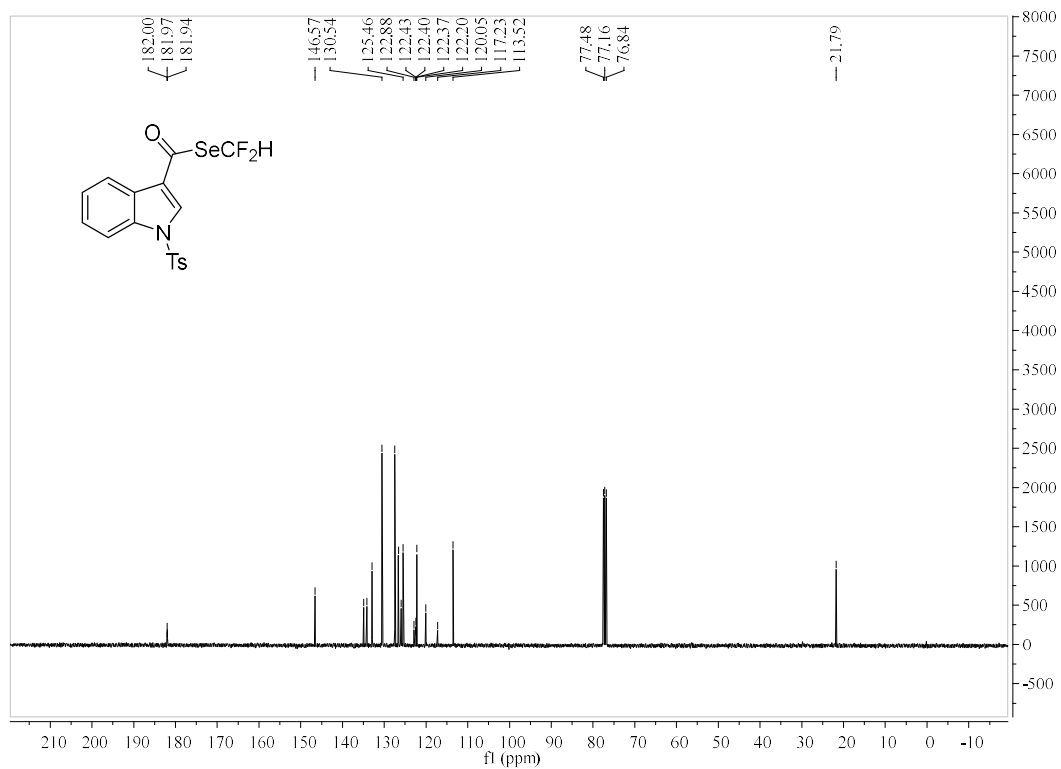



### $^1\text{H}$ NMR spectra of compound **3ae**

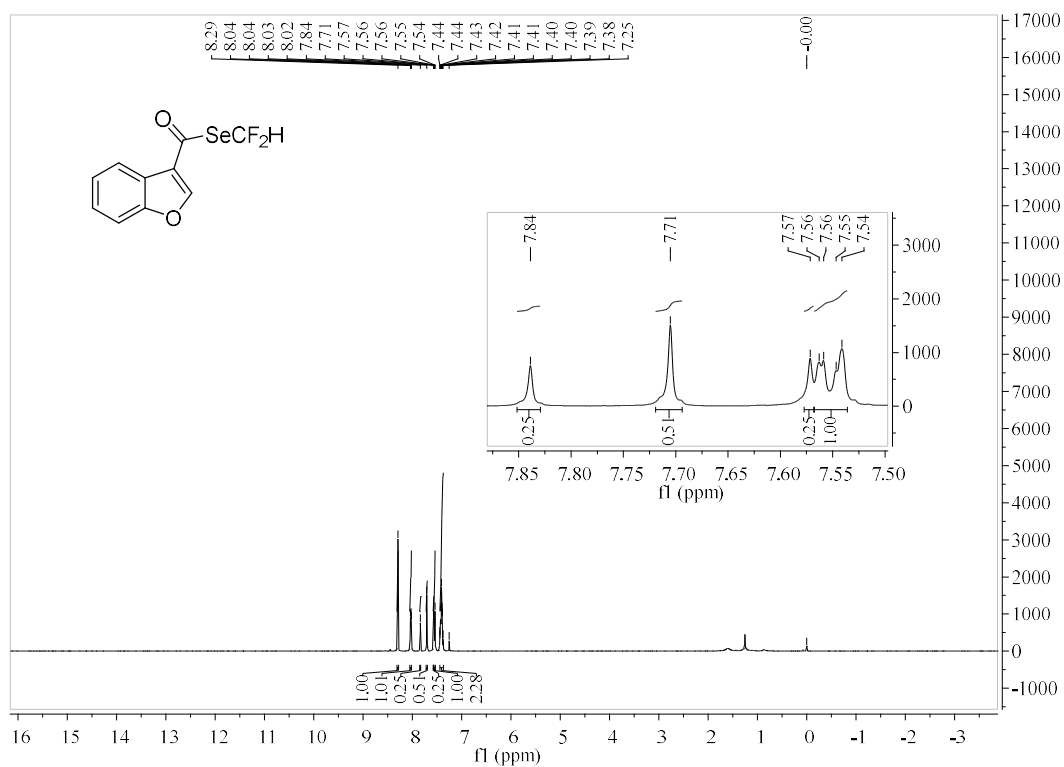

### $^{19}\text{F}$ NMR spectra of compound **3ae**

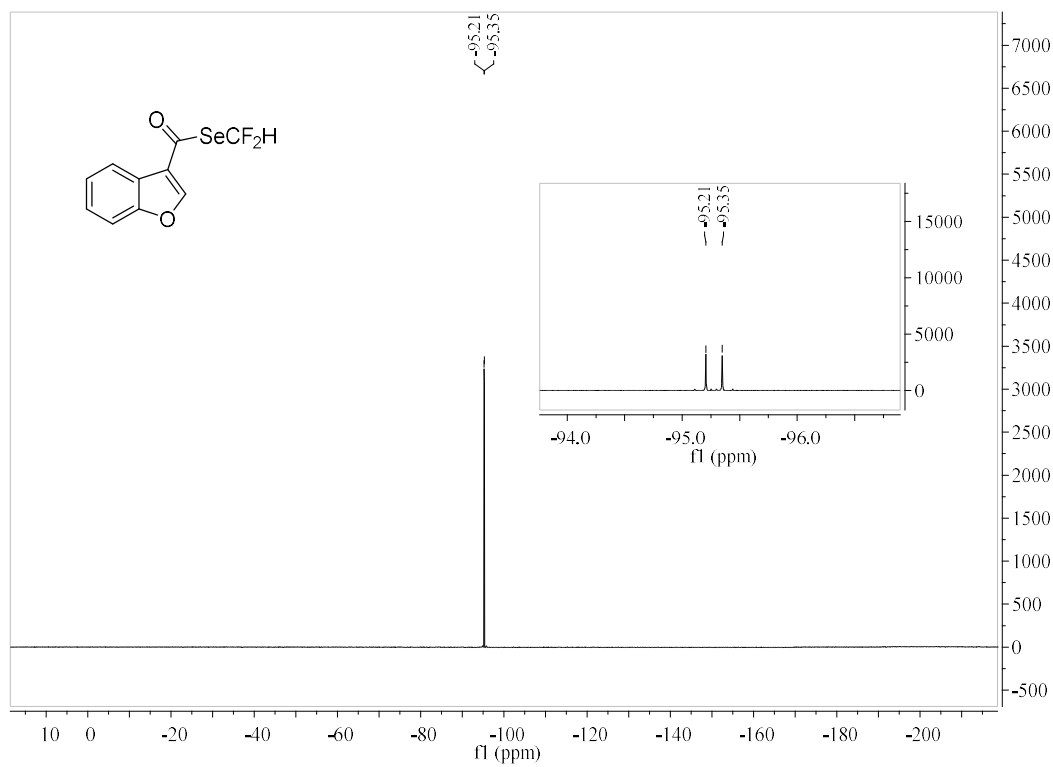

### <sup>13</sup>C NMR spectra of compound **3ae**

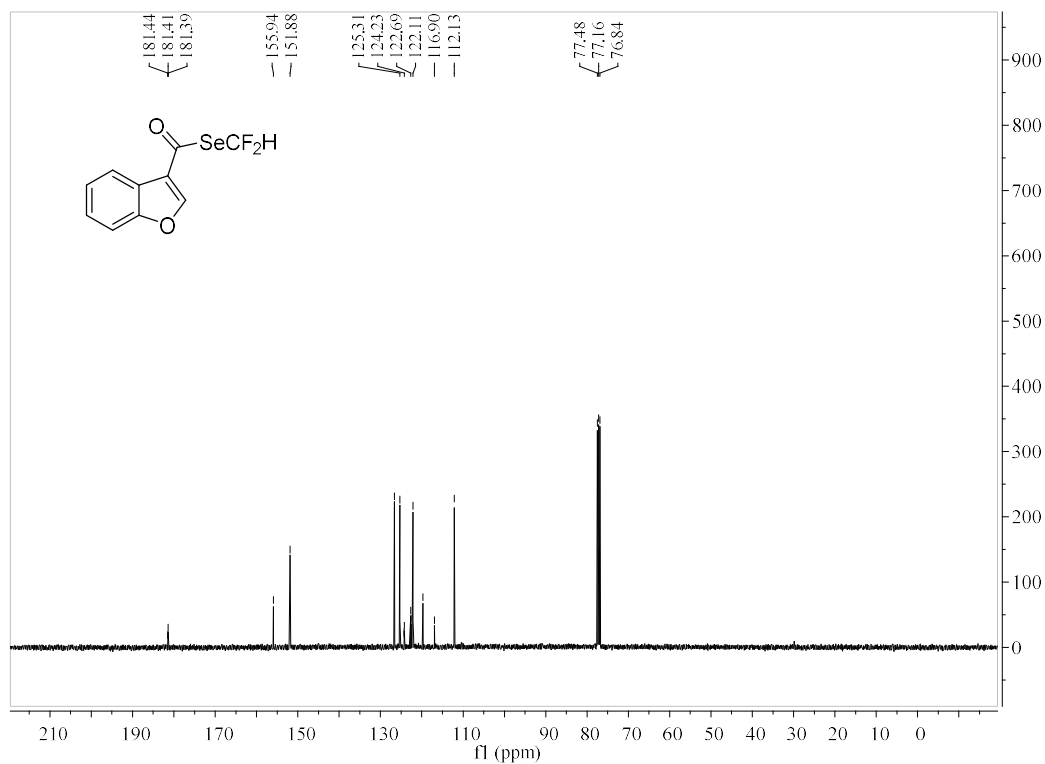

### <sup>1</sup>H NMR spectra of compound **3af**

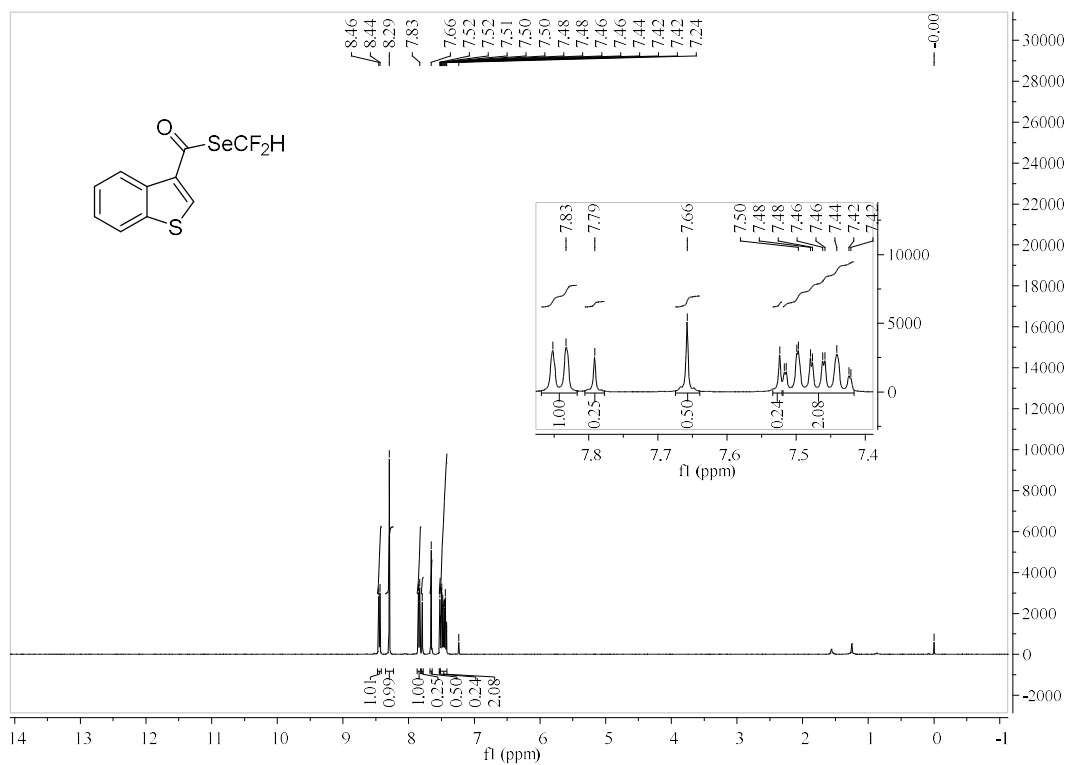

### <sup>19</sup>F NMR spectra of compound **3af**

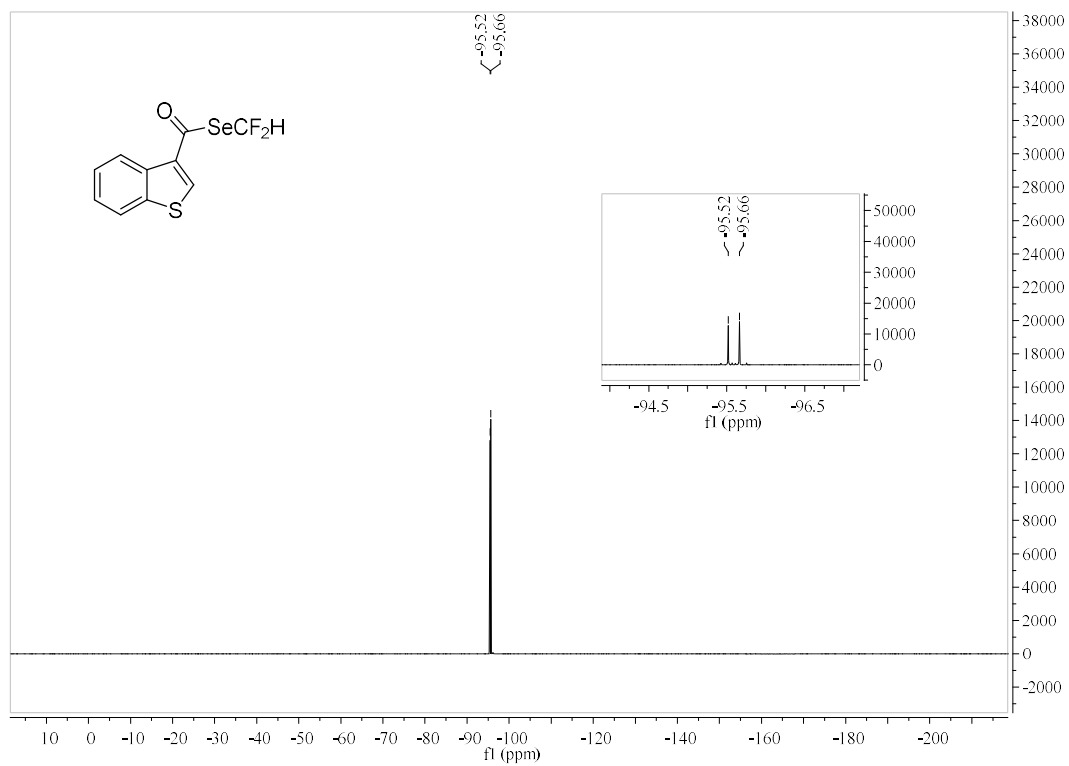

### <sup>13</sup>C NMR spectra of compound **3af**

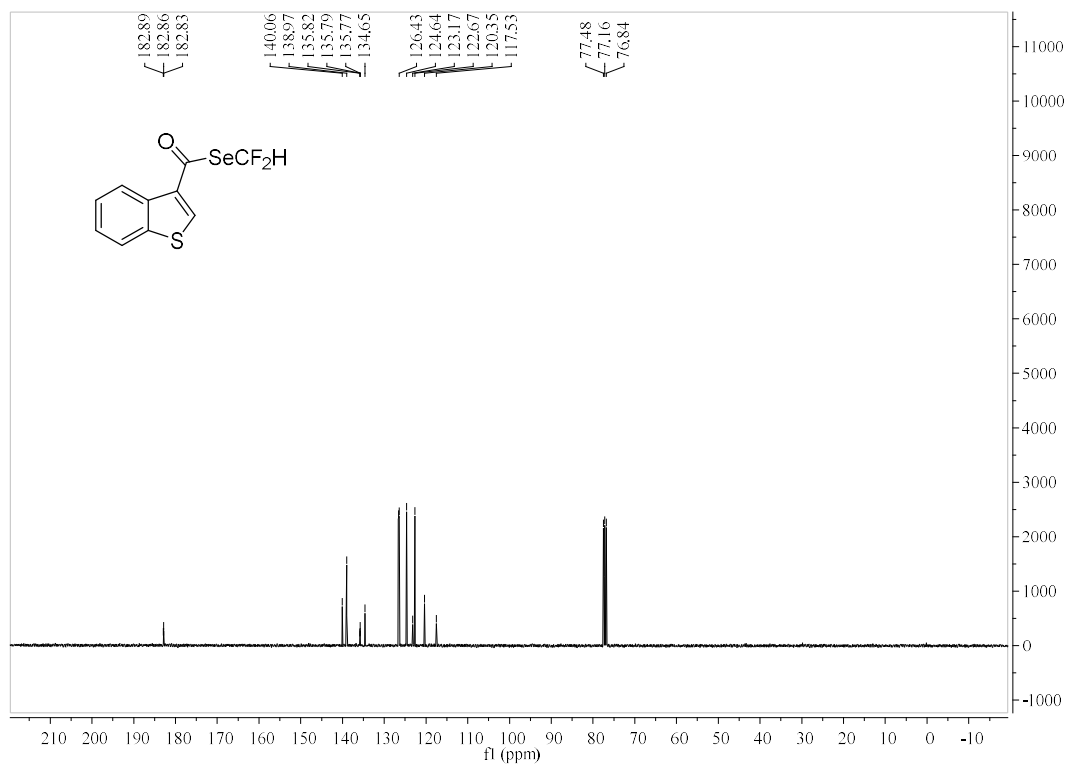

### <sup>1</sup>H NMR spectra of compound **3ag**

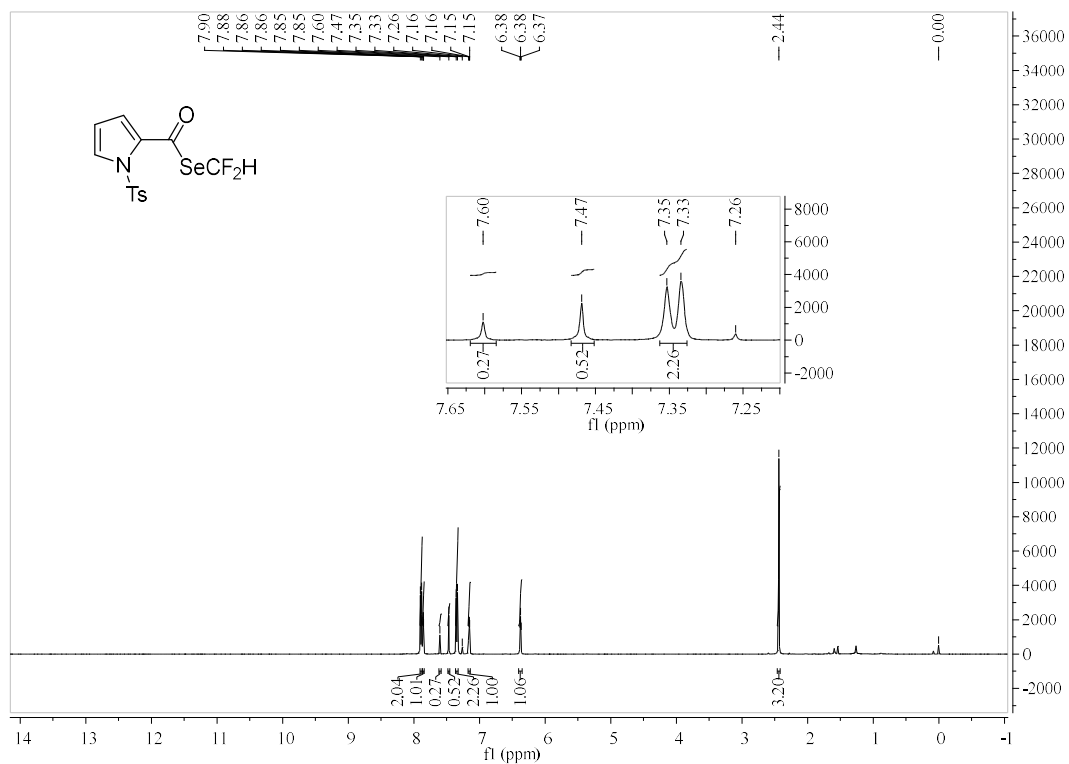

### <sup>19</sup>F NMR spectra of compound **3ag**

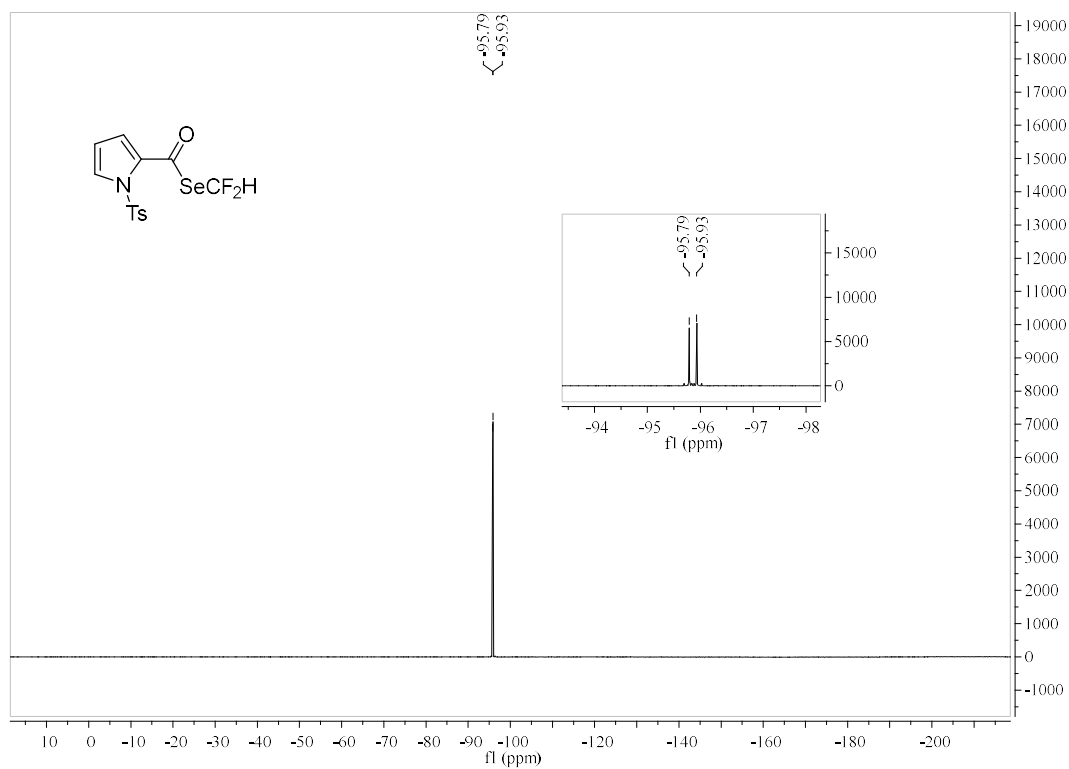

<sup>13</sup>C NMR spectra of compound **3ag**

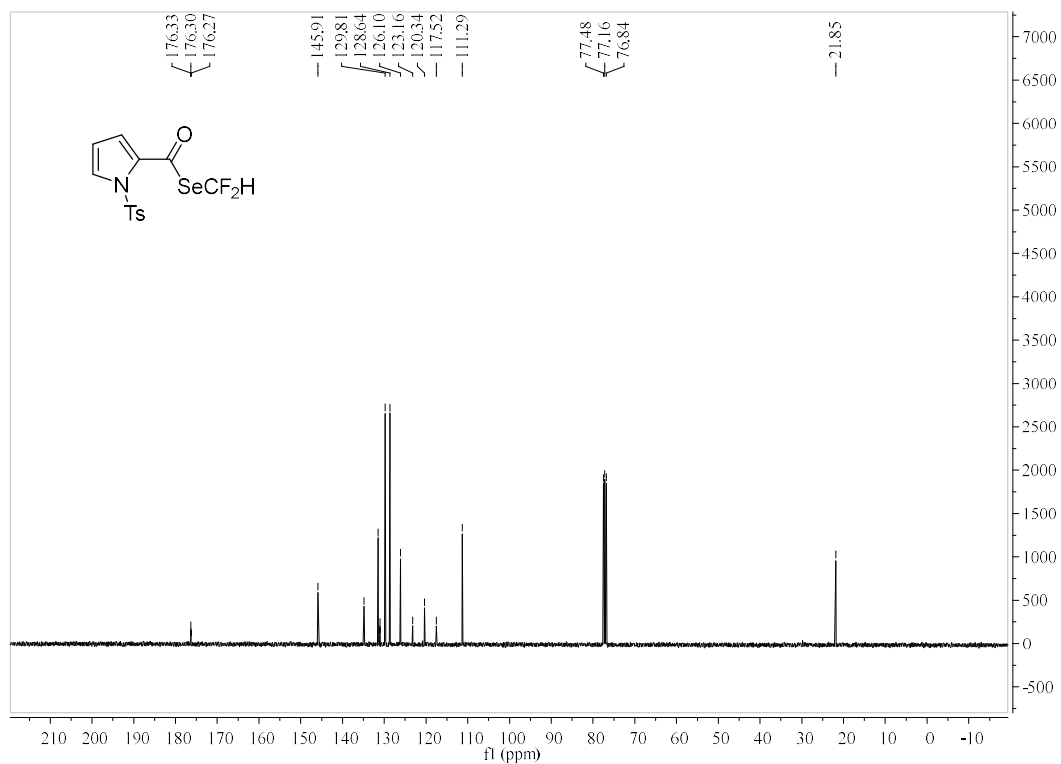

<sup>1</sup>H NMR spectra of compound **3ah**

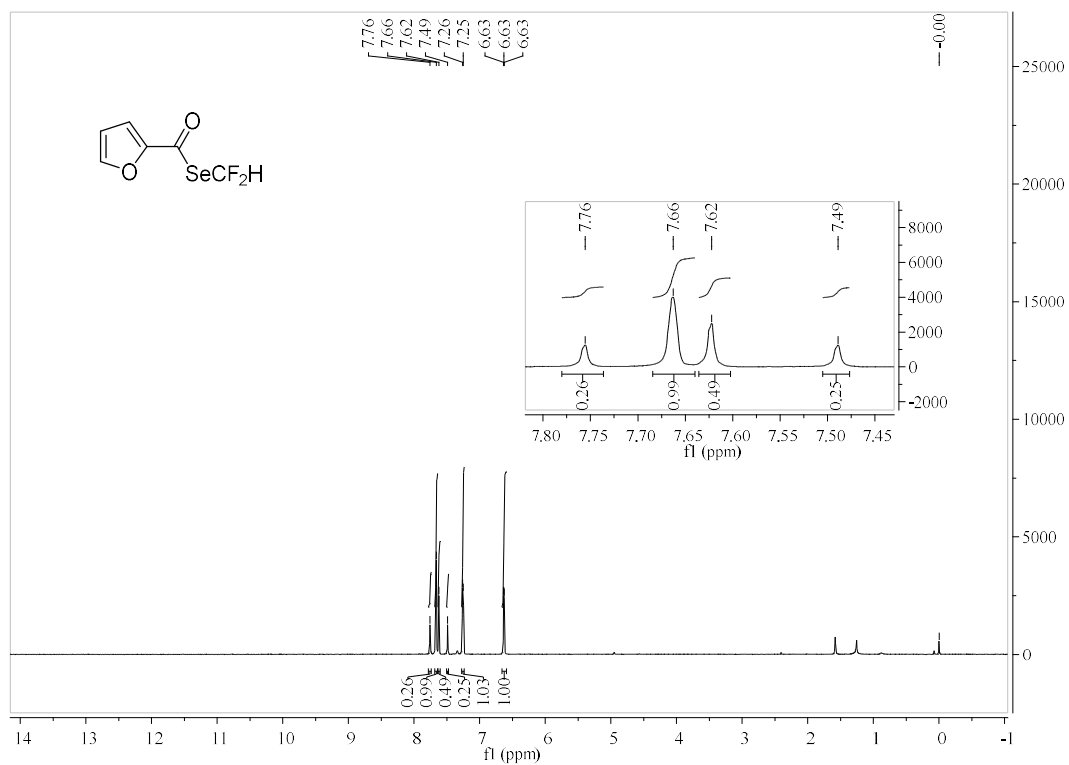

### <sup>19</sup>F NMR spectra of compound **3ah**

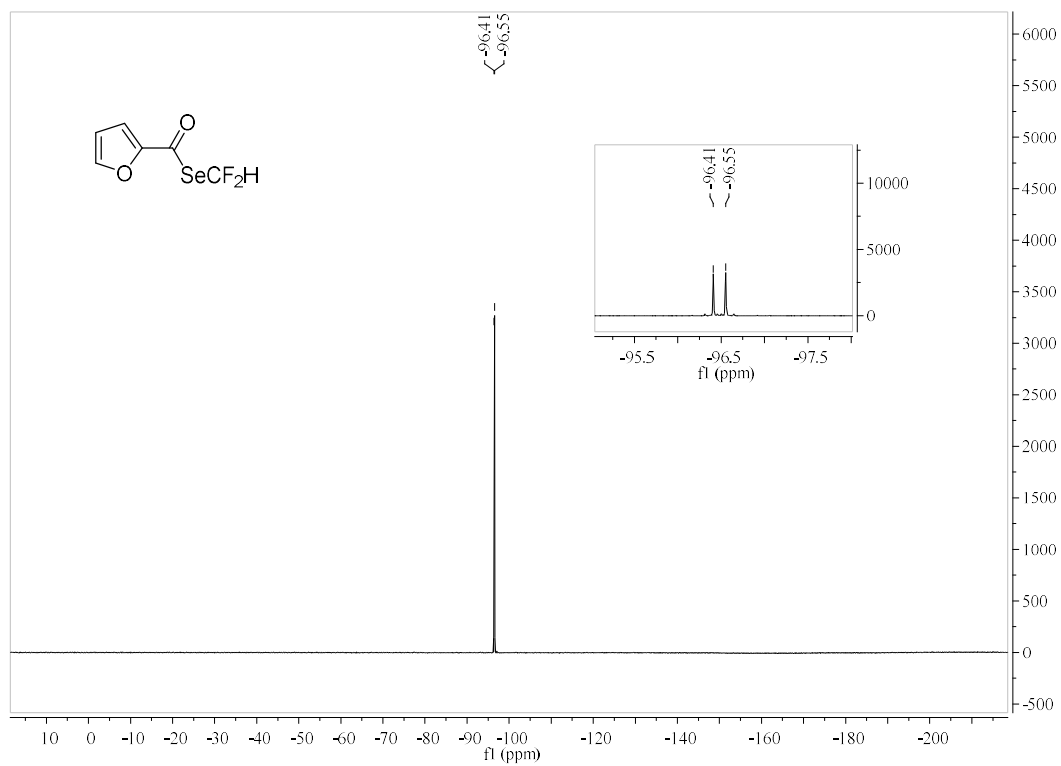

### <sup>13</sup>C NMR spectra of compound **3ah**

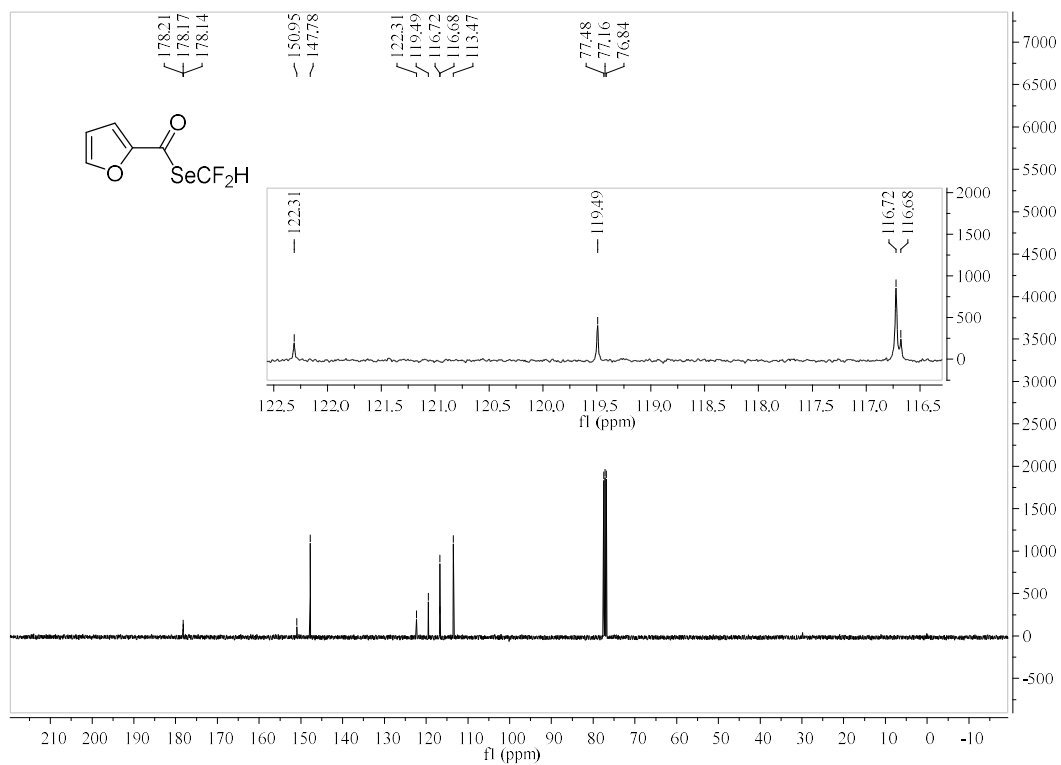

### <sup>1</sup>H NMR spectra of compound **3ai**

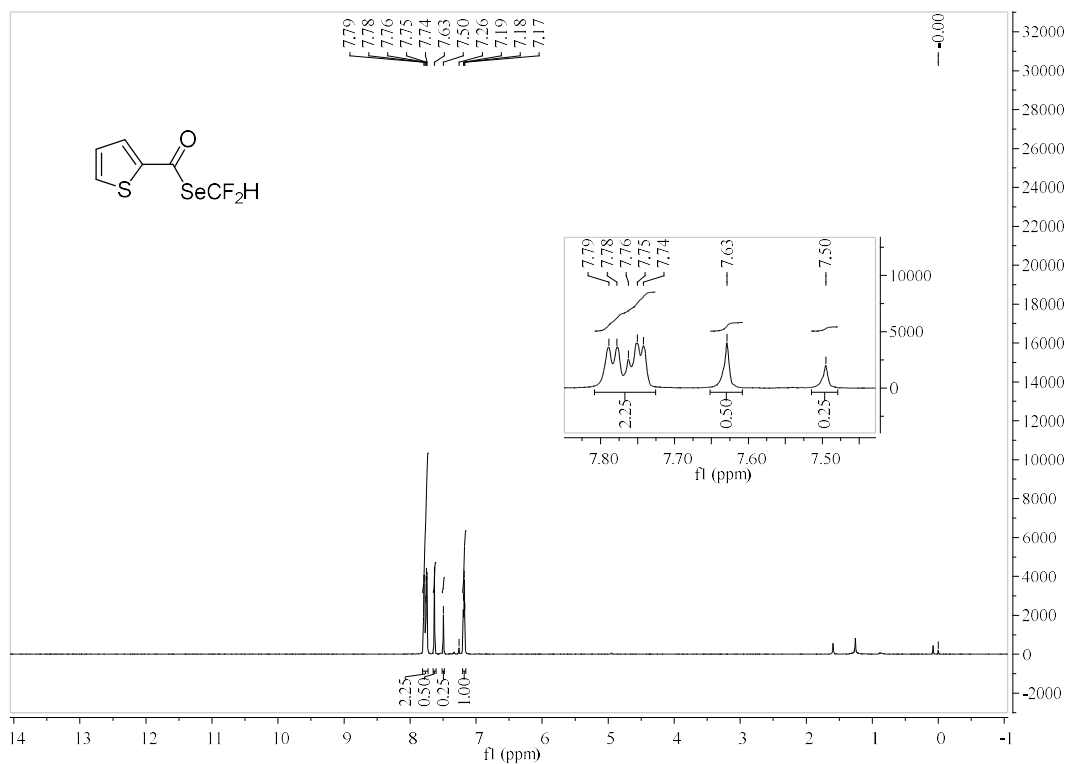

### <sup>19</sup>F NMR spectra of compound **3ai**

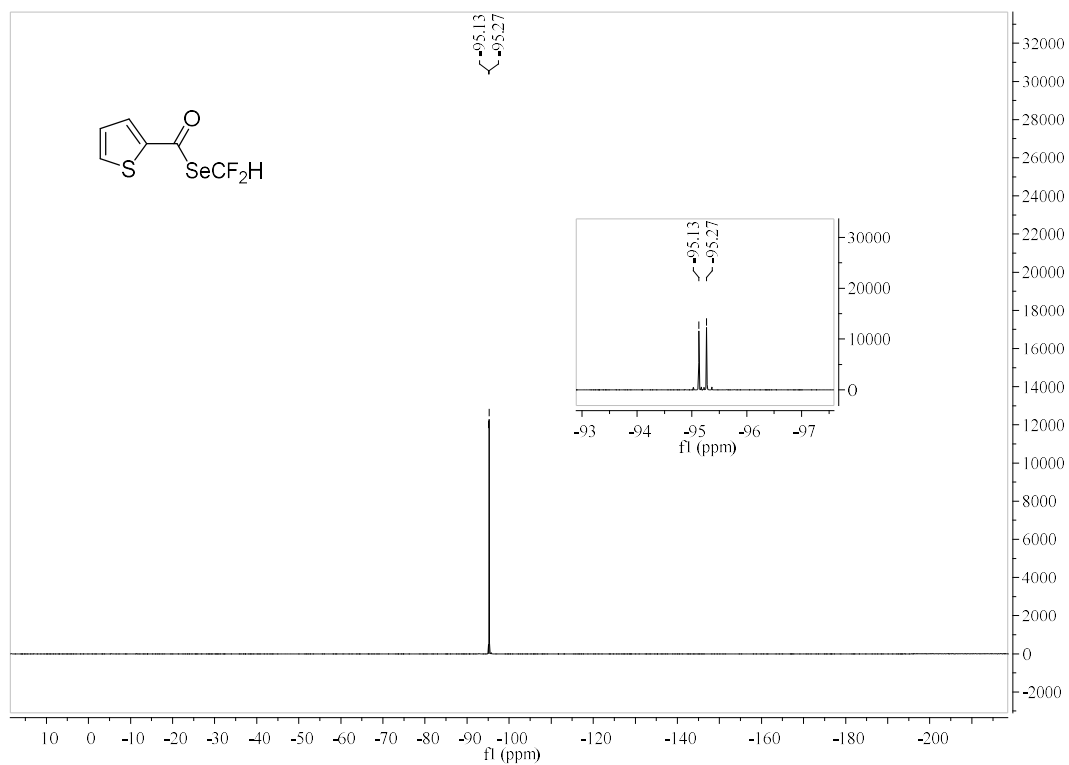

### <sup>13</sup>C NMR spectra of compound **3ai**

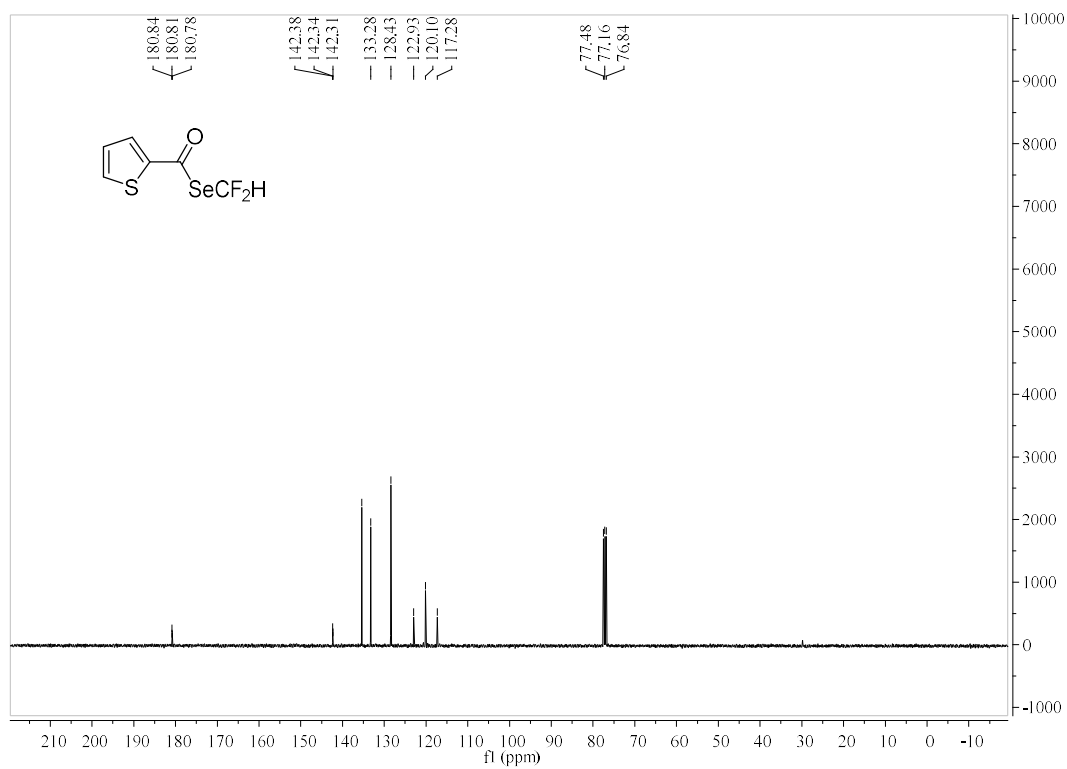

### <sup>1</sup>H NMR spectra of compound **3ba**

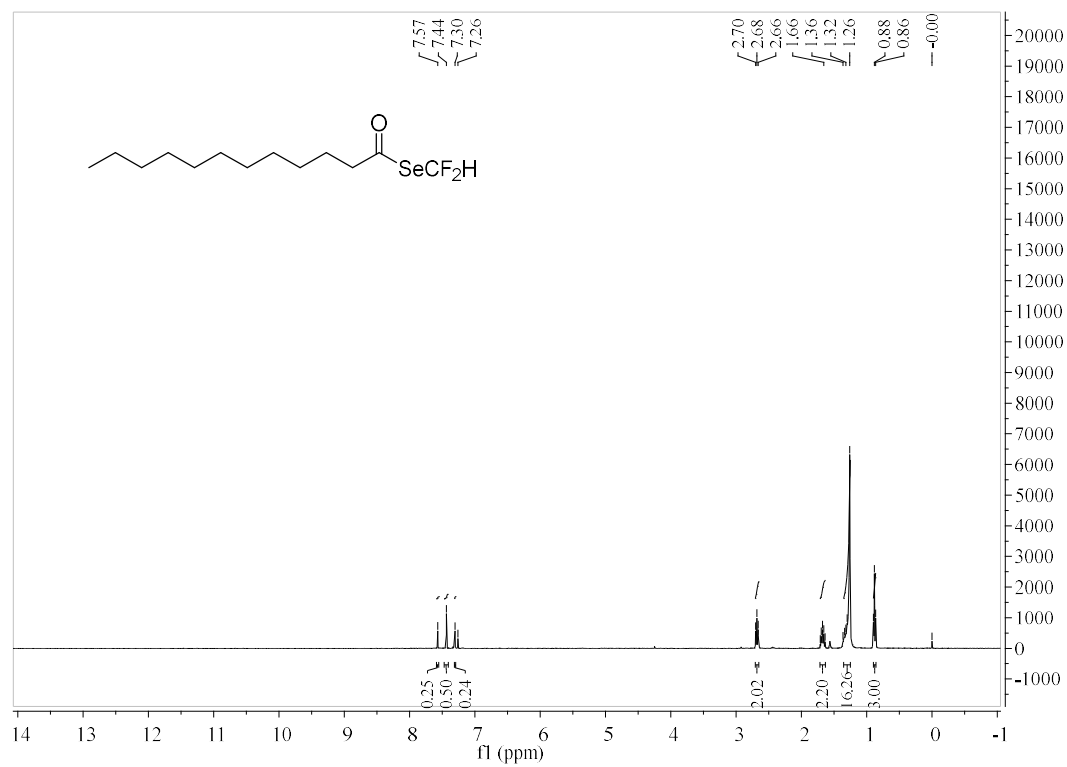



<sup>19</sup>F NMR spectra of compound **3ba**

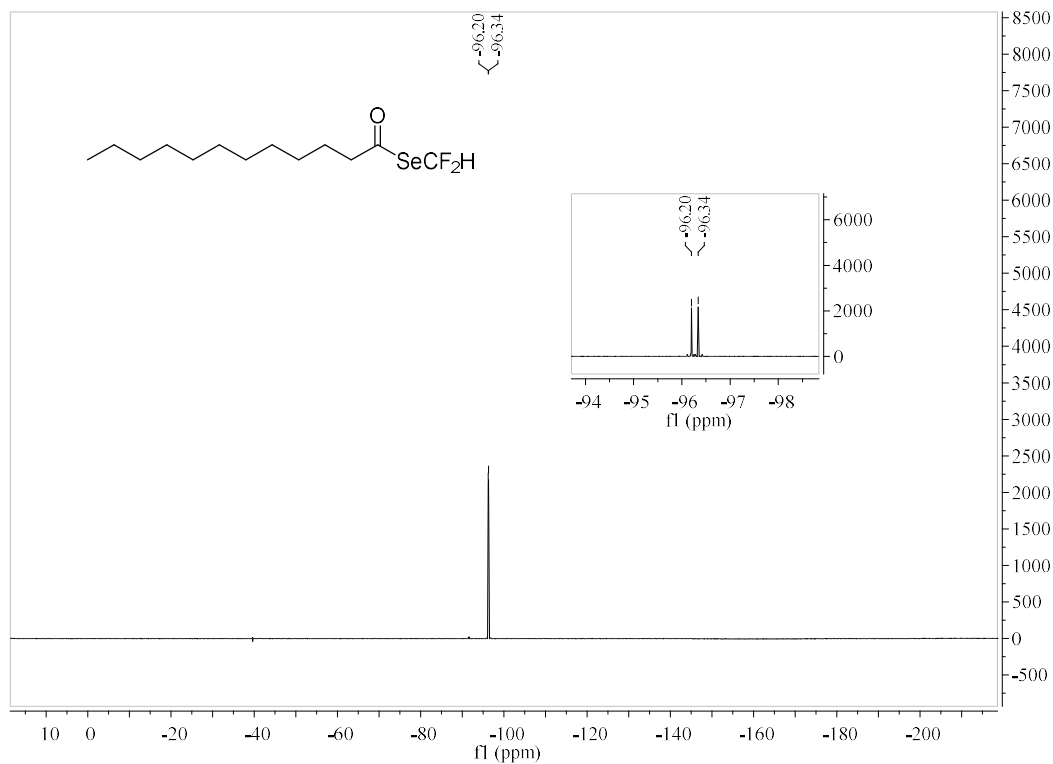

<sup>13</sup>C NMR spectra of compound **3ba**

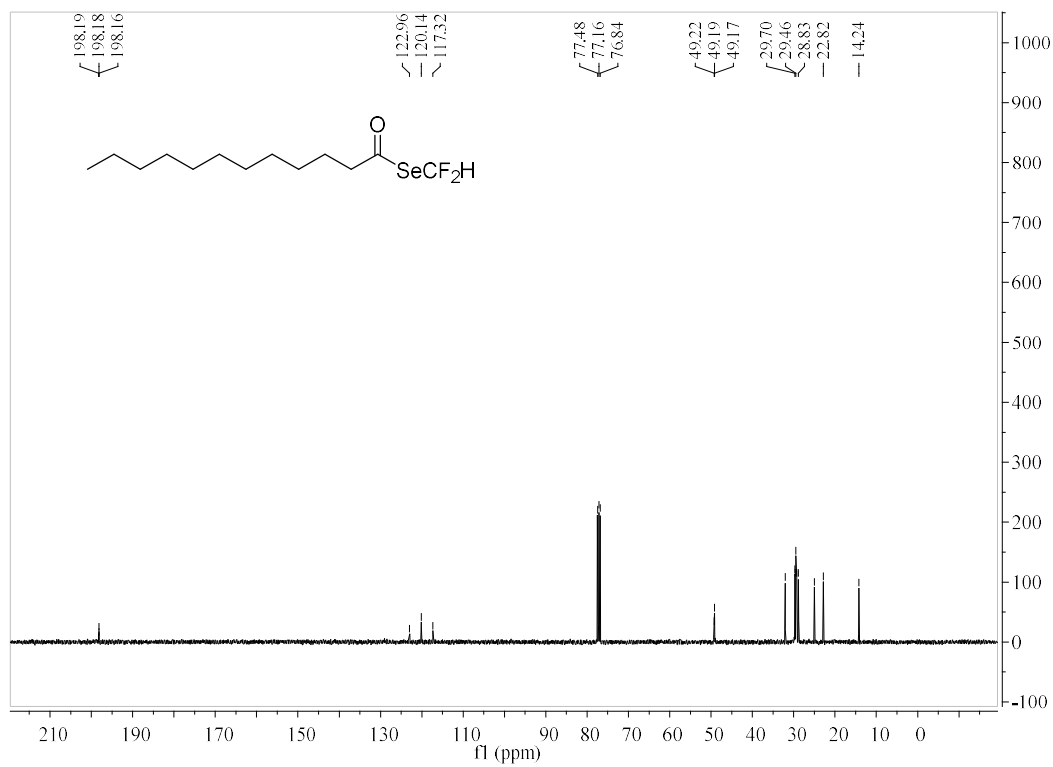

<sup>1</sup>H NMR spectra of compound **3bb**

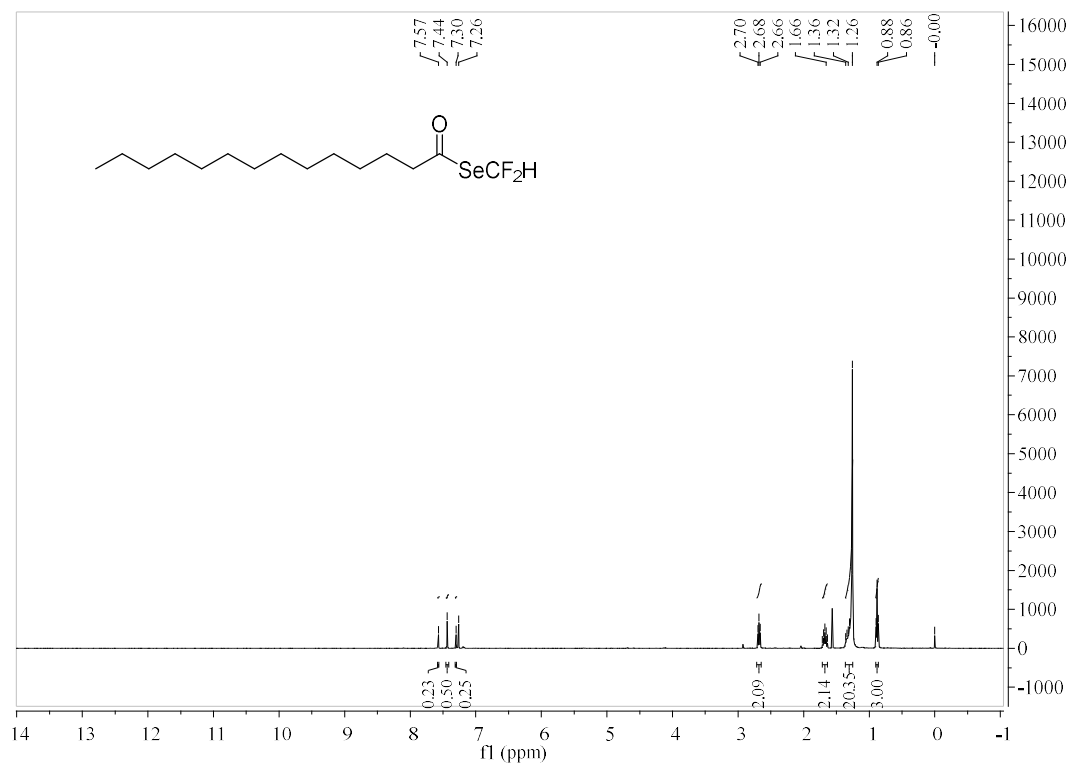

<sup>19</sup>F NMR spectra of compound **3bb**

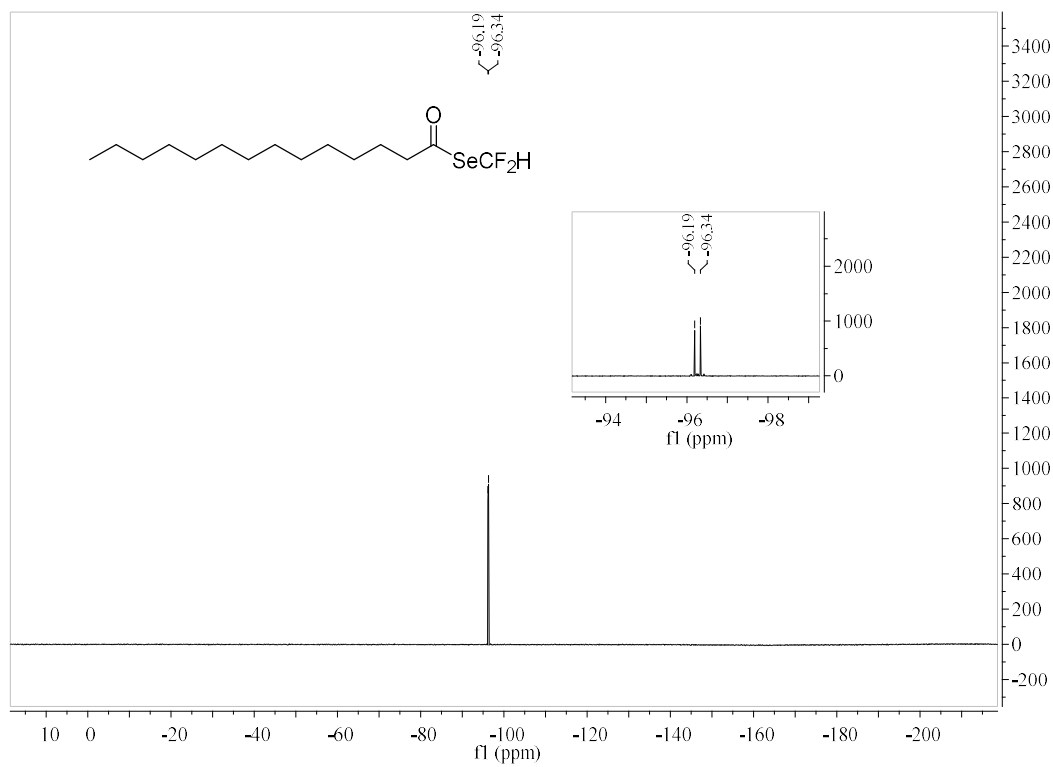

<sup>13</sup>C NMR spectra of compound **3bb**

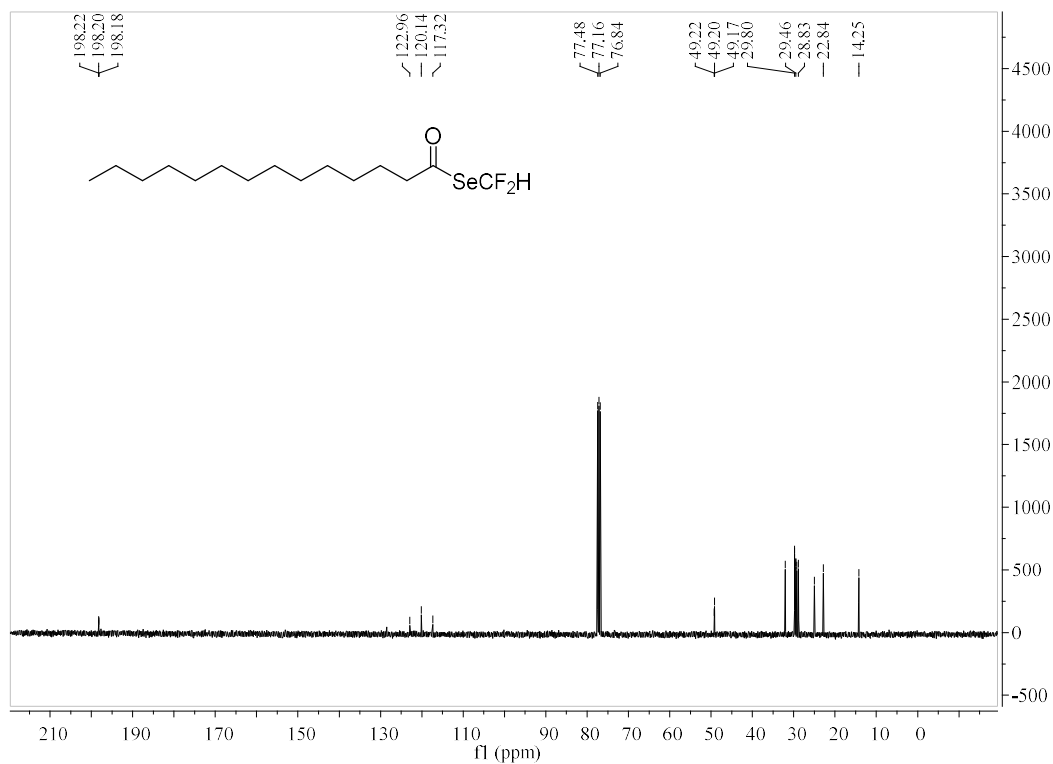

<sup>1</sup>H NMR spectra of compound **3bc**

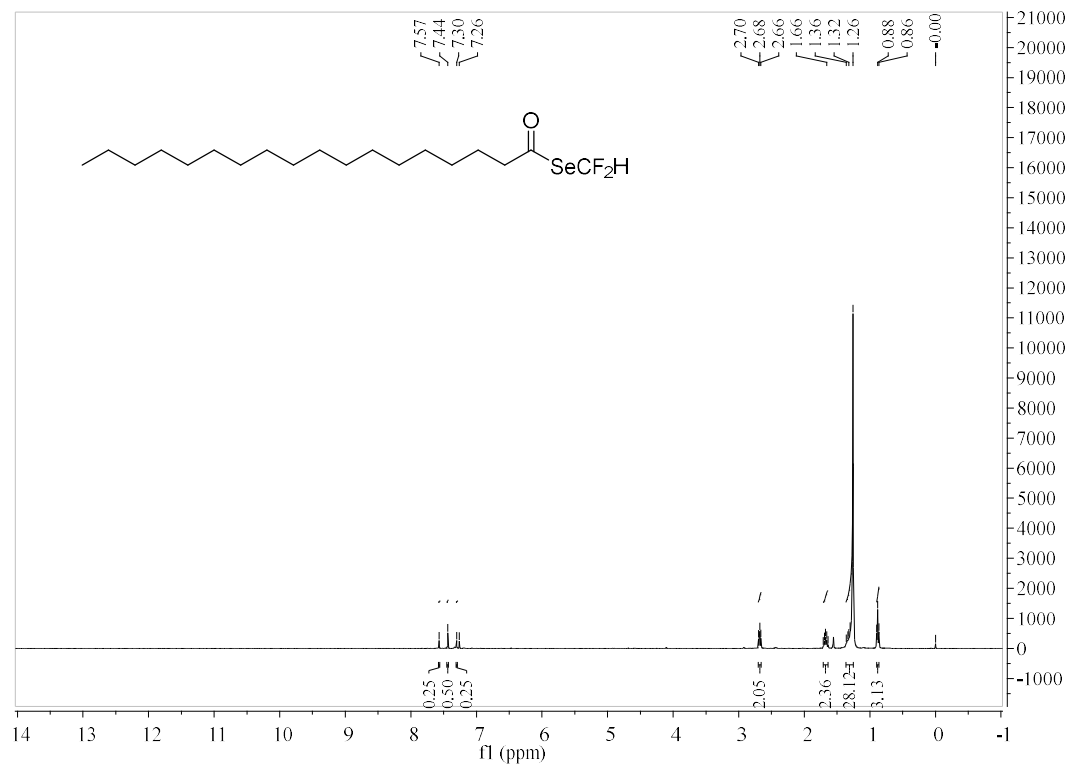

<sup>19</sup>F NMR spectra of compound **3bc**

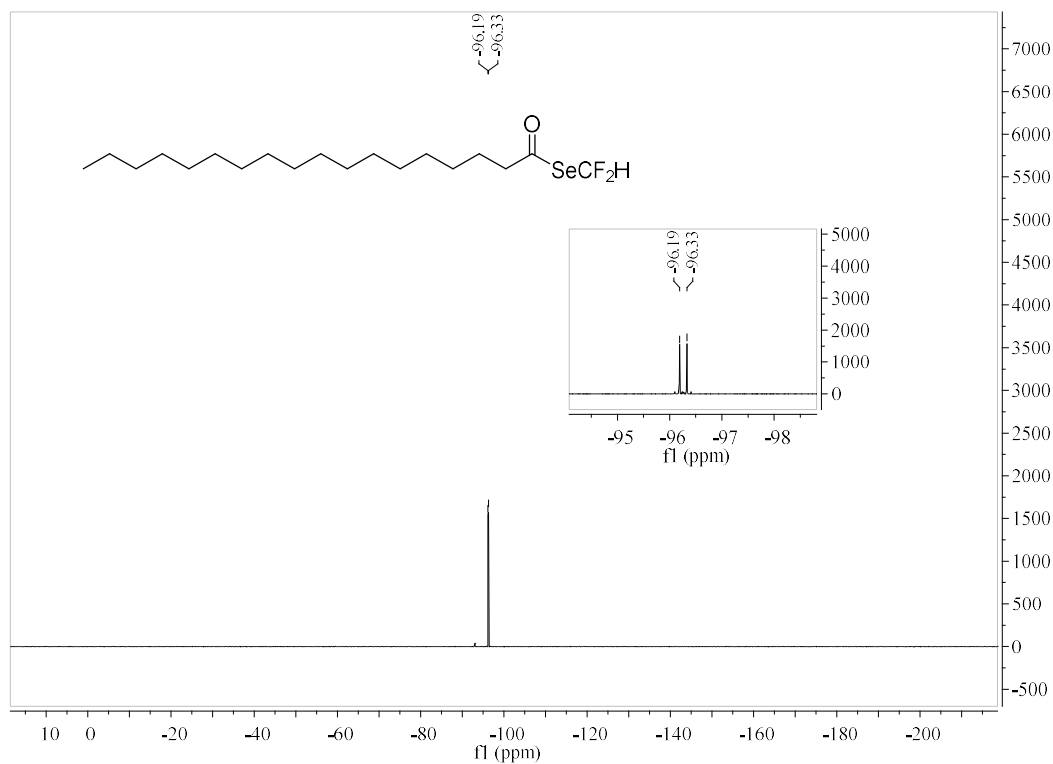

<sup>13</sup>C NMR spectra of compound **3bc**

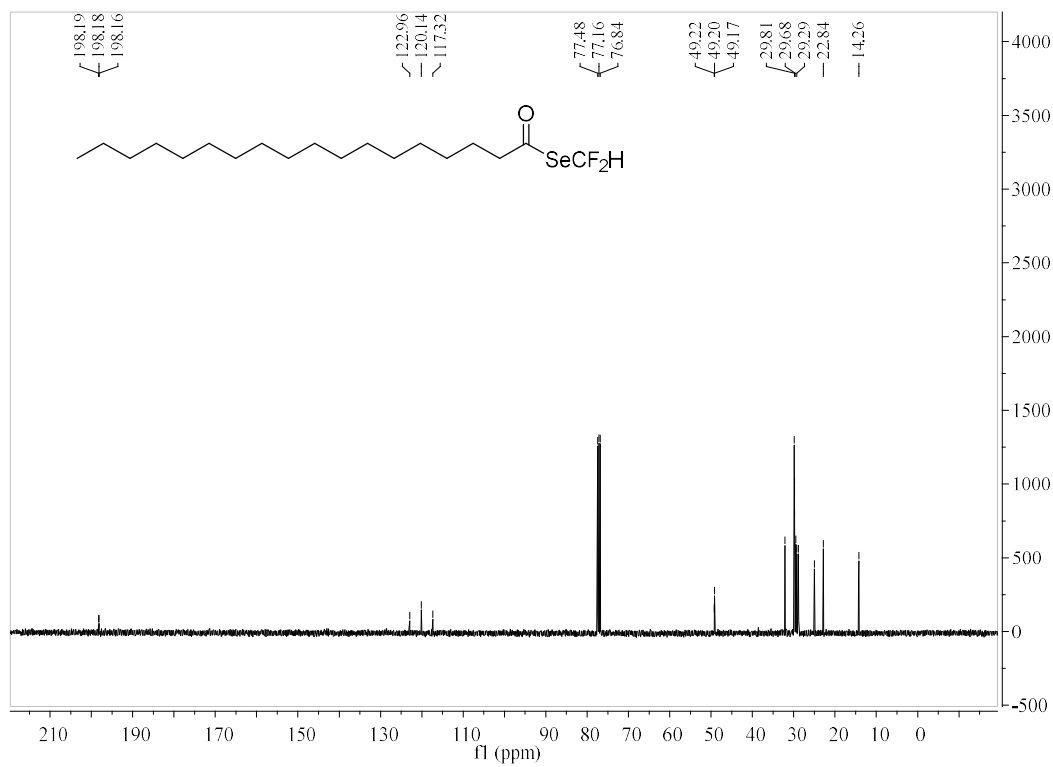

### <sup>1</sup>H NMR spectra of compound **3bd**

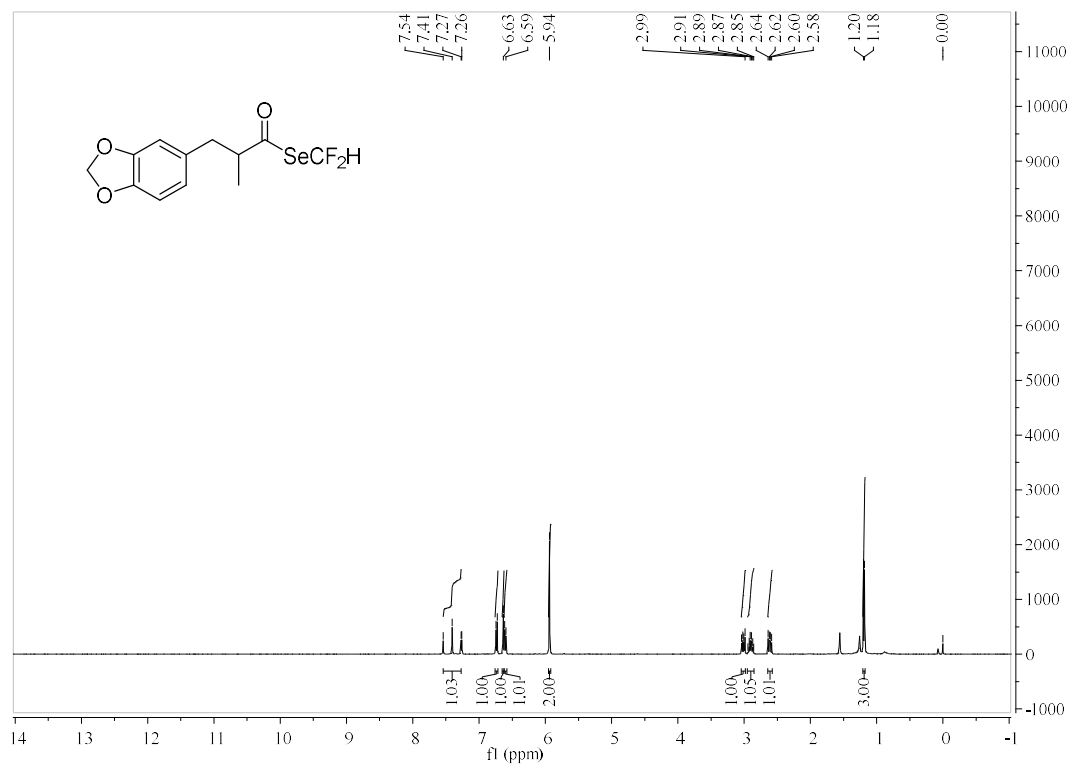

### <sup>19</sup>F NMR spectra of compound **3bd**

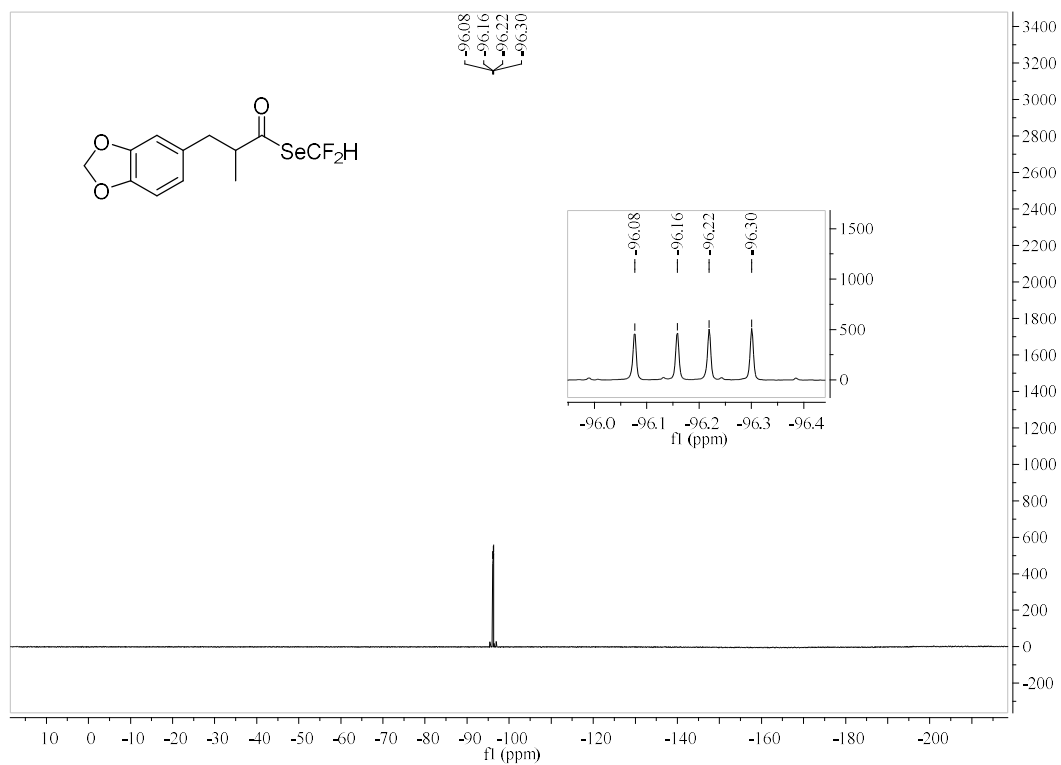

<sup>13</sup>C NMR spectra of compound **3bd**

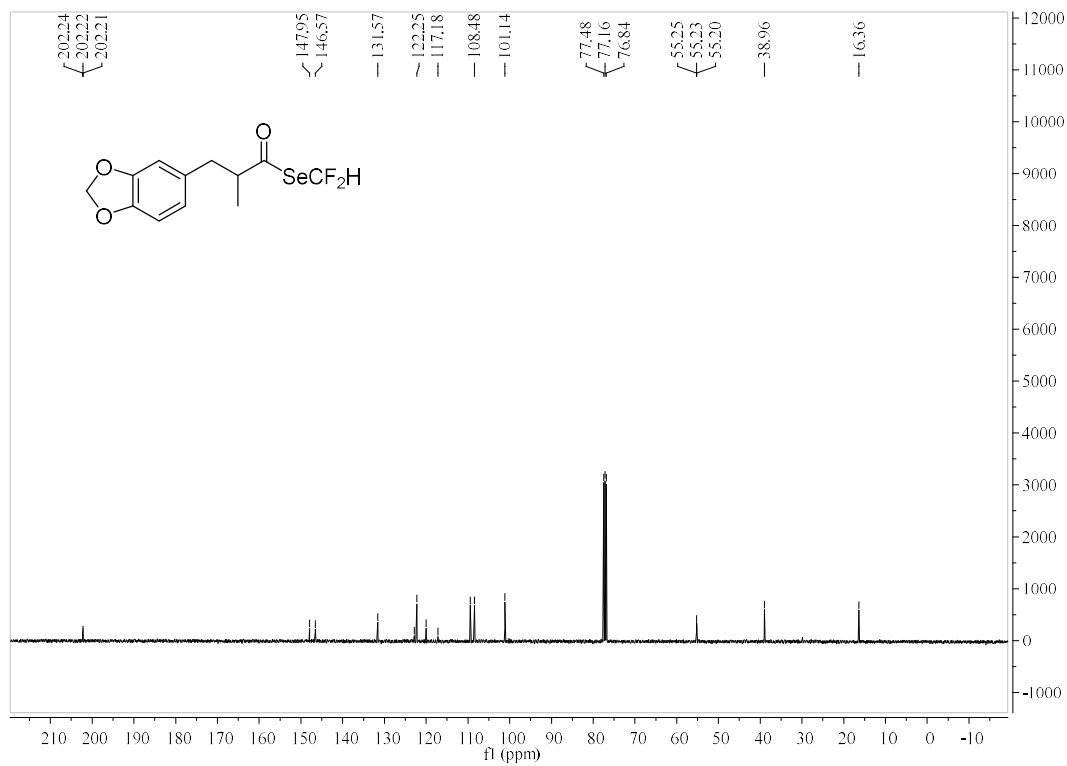

<sup>1</sup>H NMR spectra of compound **3be**

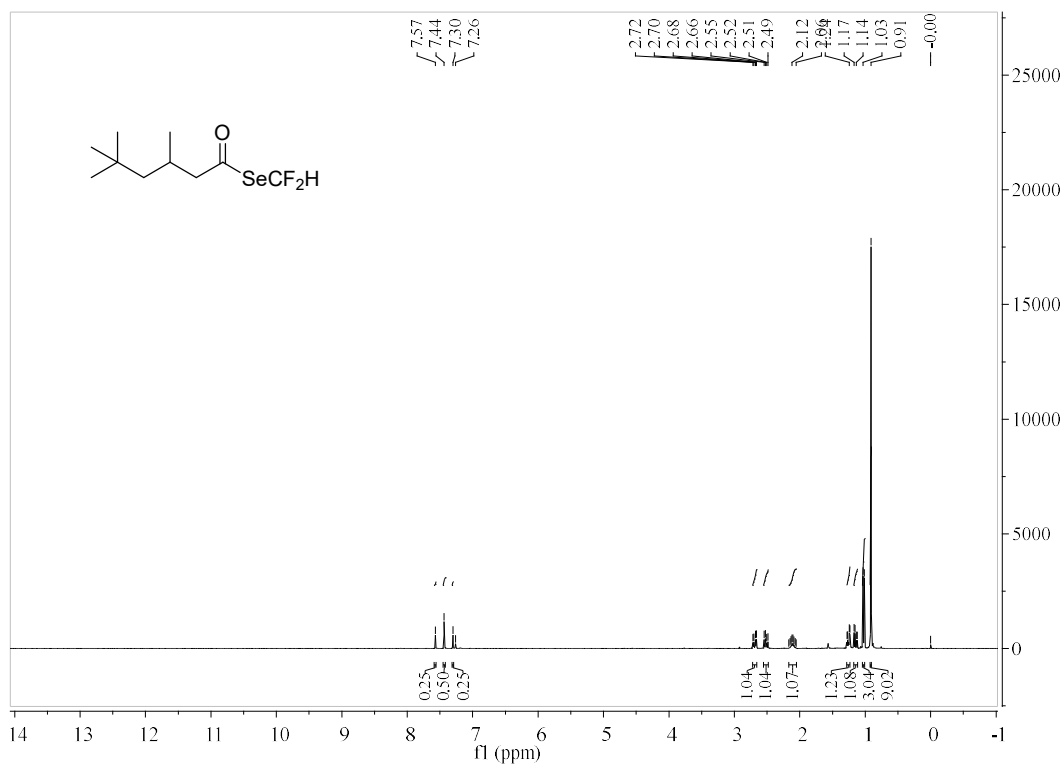

<sup>19</sup>F NMR spectra of compound **3be**

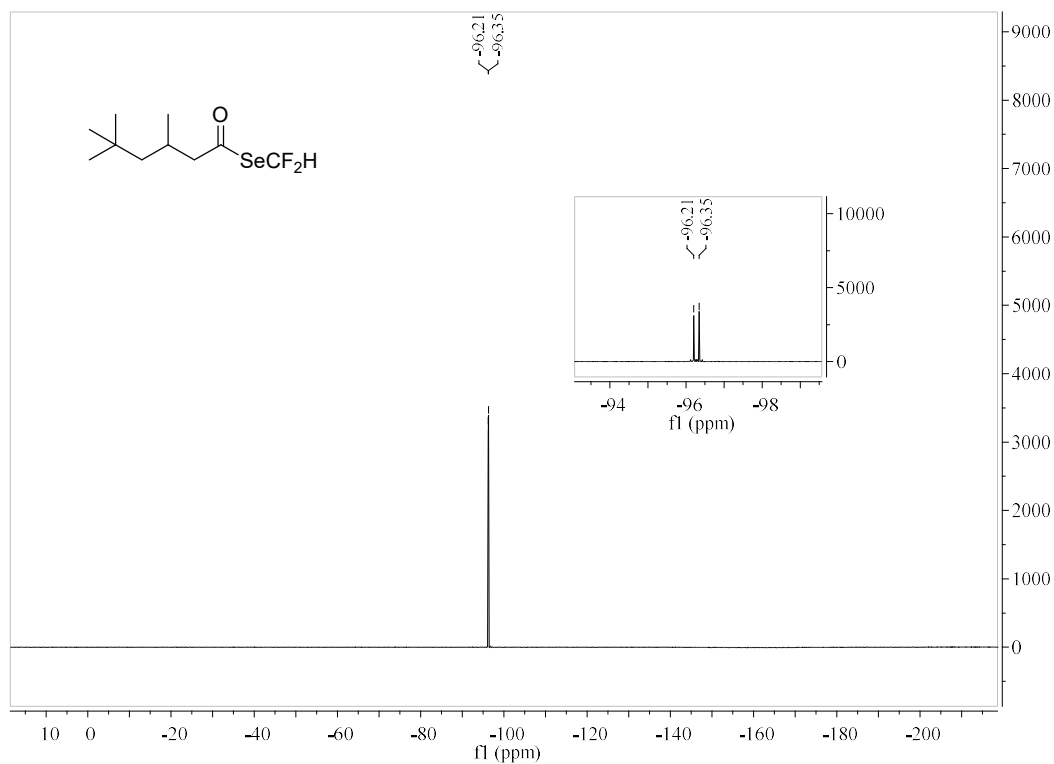

<sup>13</sup>C NMR spectra of compound **3be**

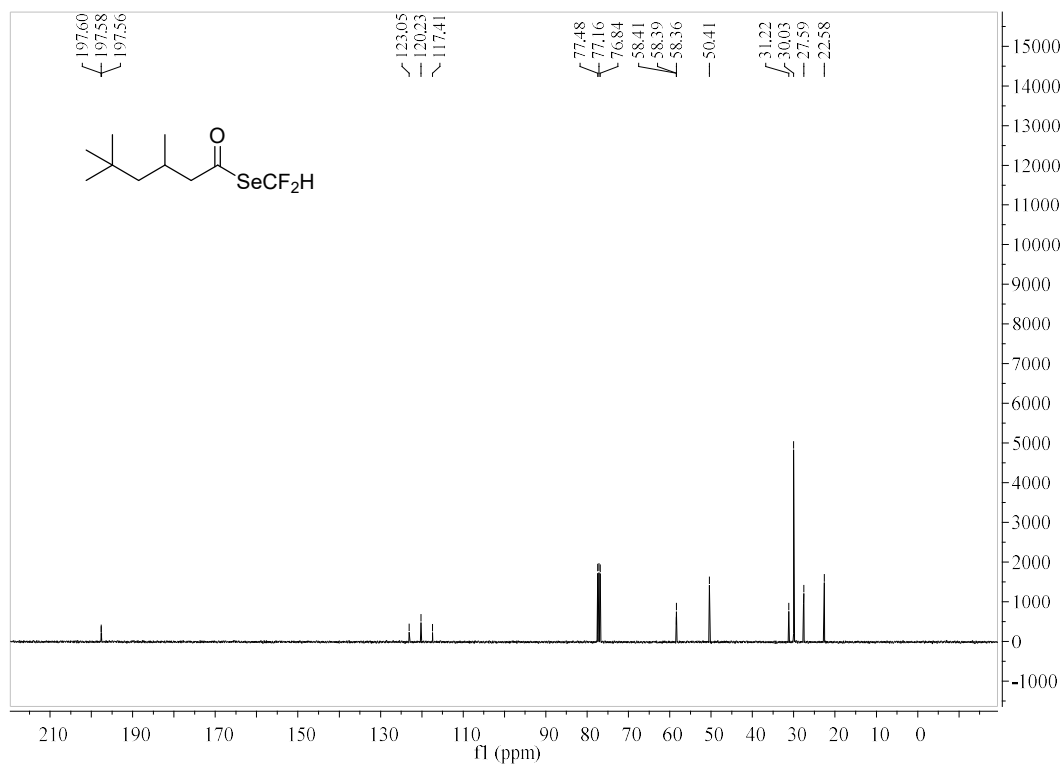

### <sup>1</sup>H NMR spectra of compound **3bf**

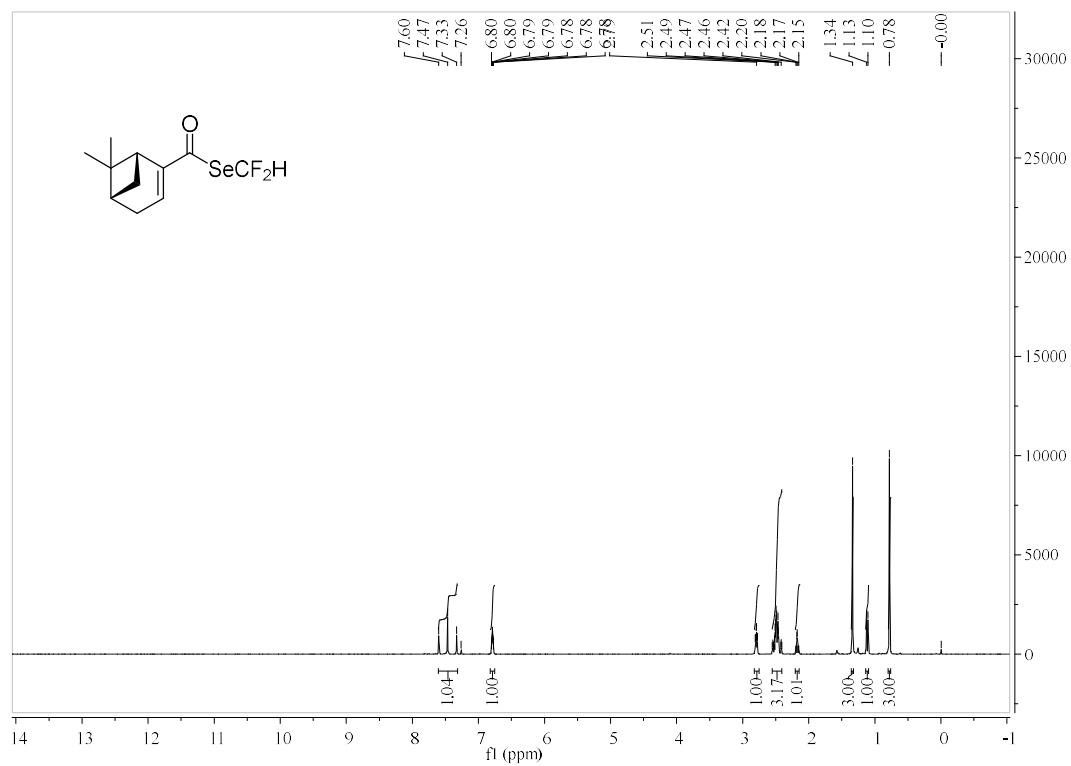

### <sup>19</sup>F NMR spectra of compound **3bf**

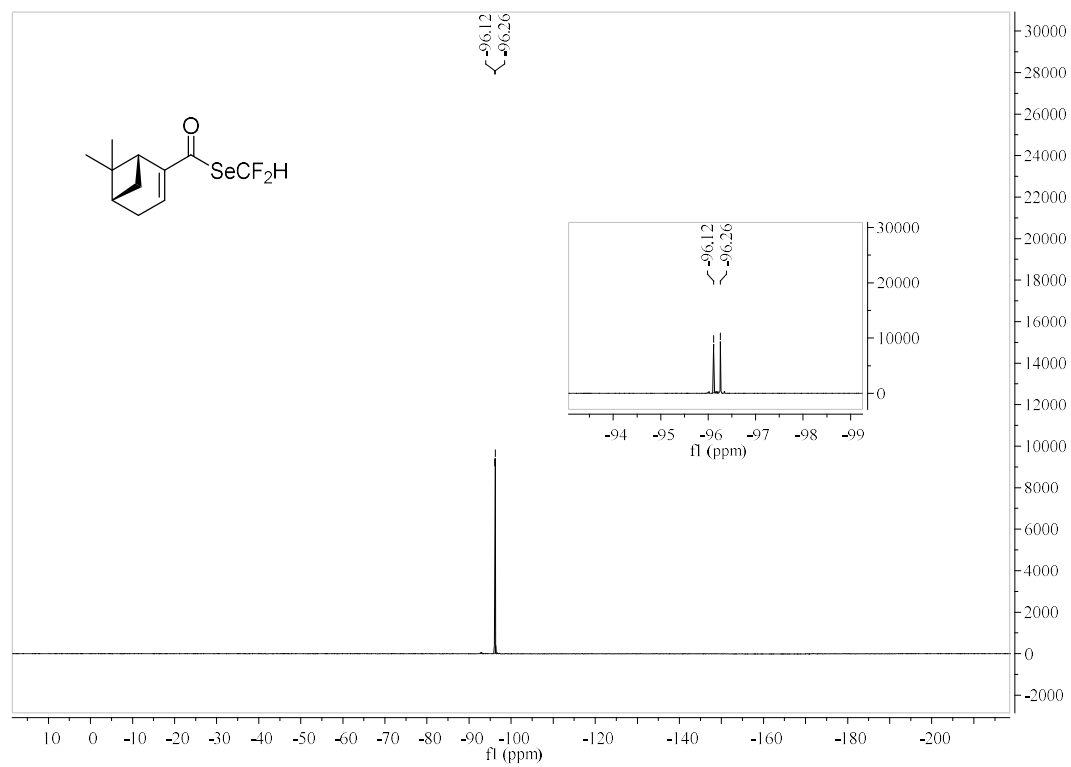



### <sup>13</sup>C NMR spectra of compound **3bf**

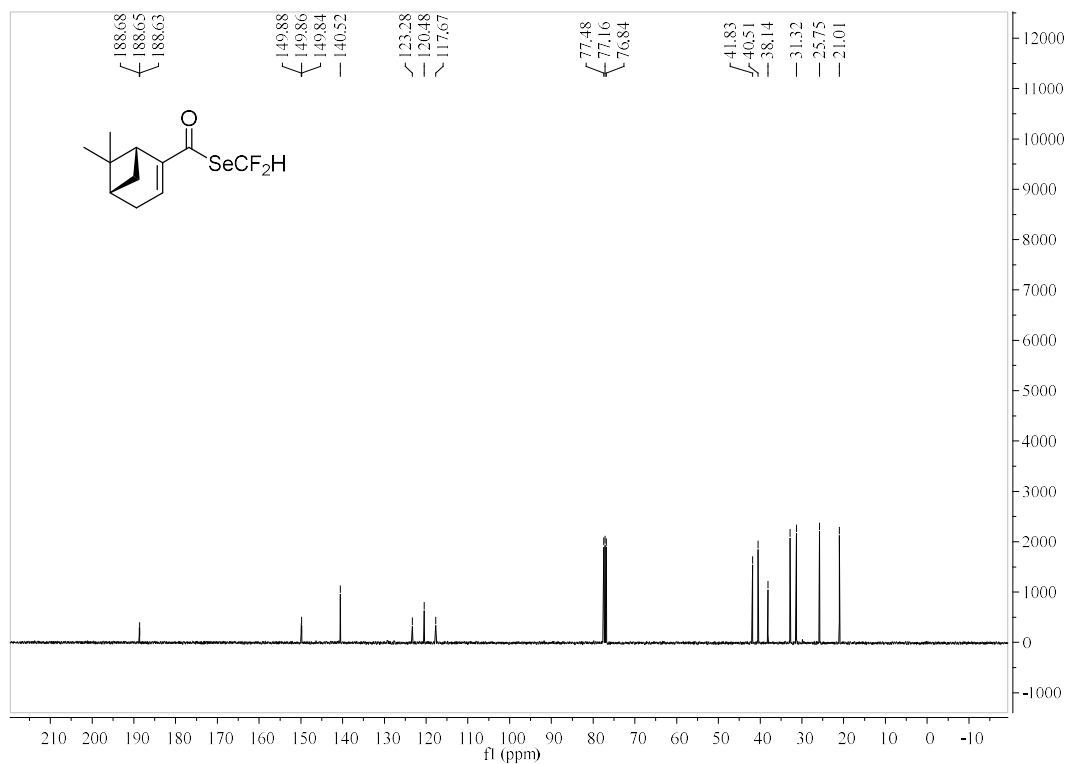

### <sup>1</sup>H NMR spectra of compound **3bg**

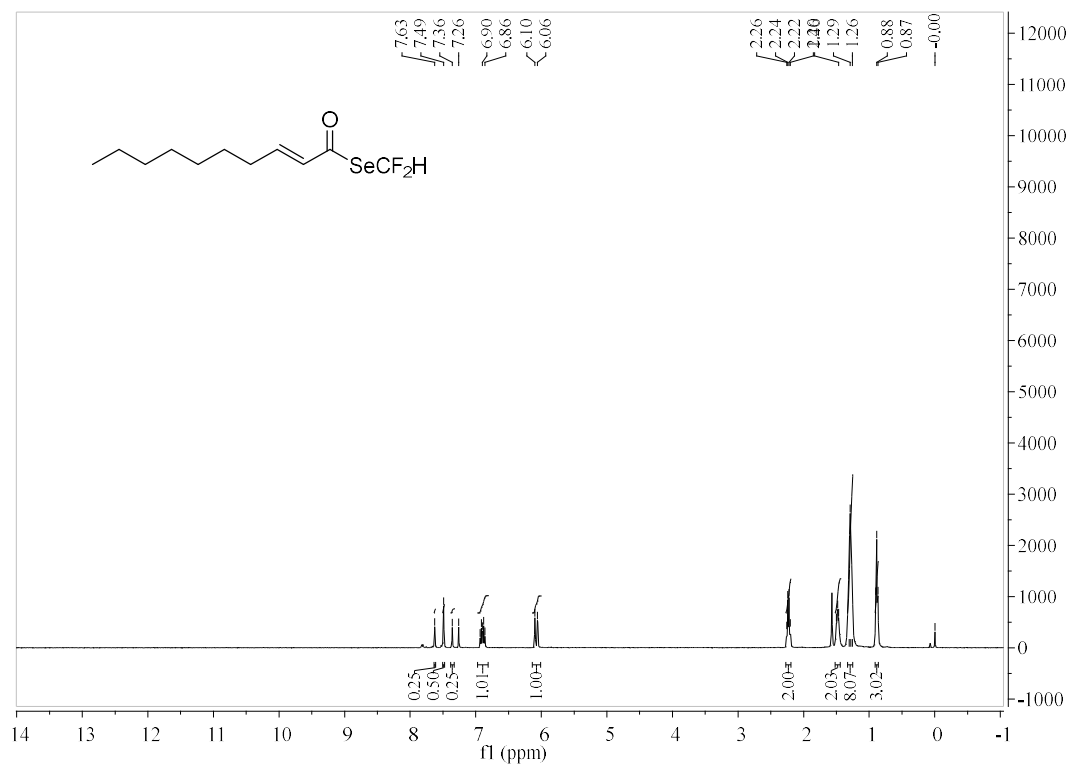

<sup>19</sup>F NMR spectra of compound **3bg**

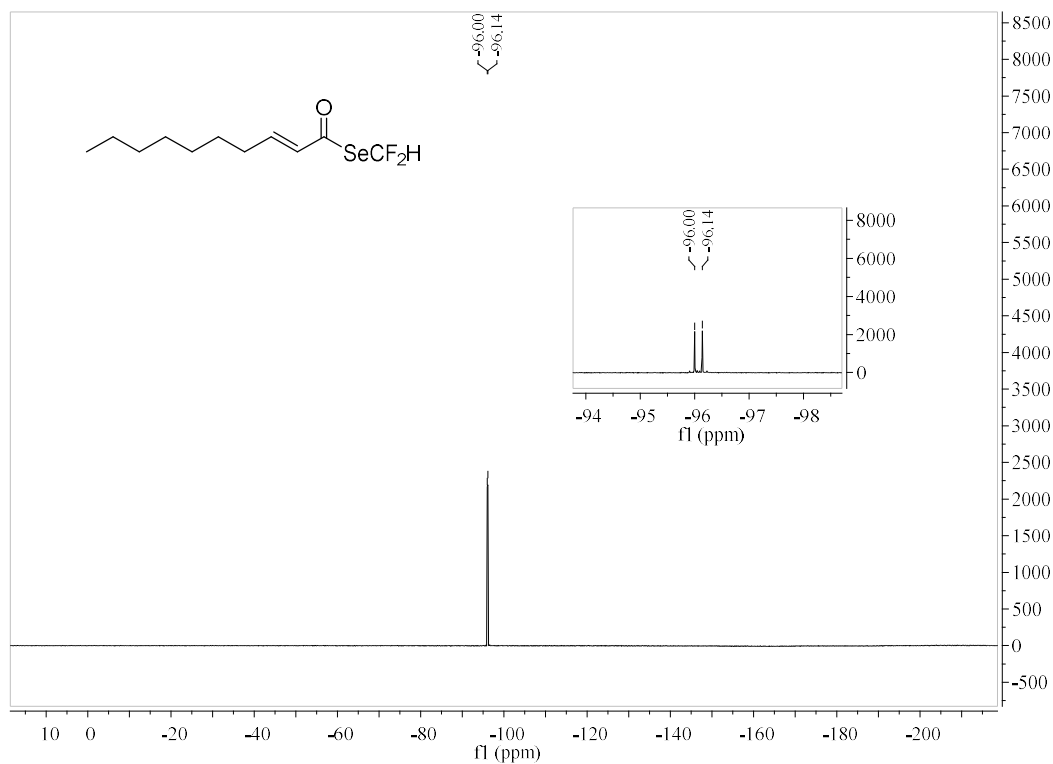

<sup>13</sup>C NMR spectra of compound **3bg**

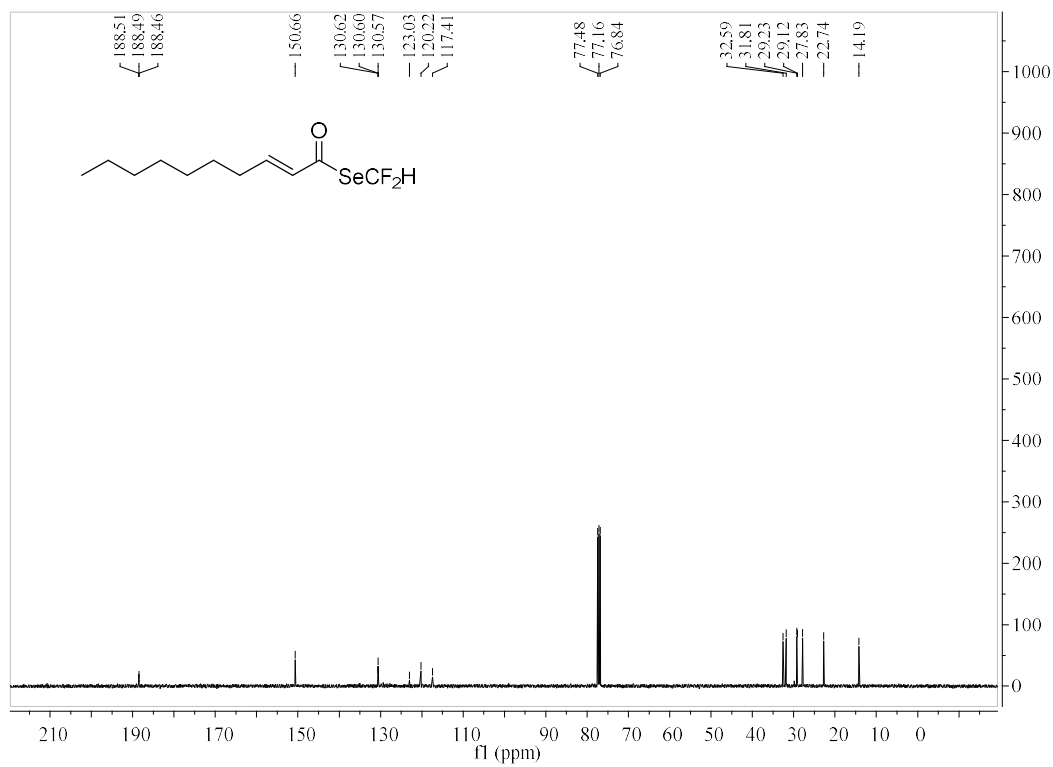

### <sup>1</sup>H NMR spectra of compound 3ca

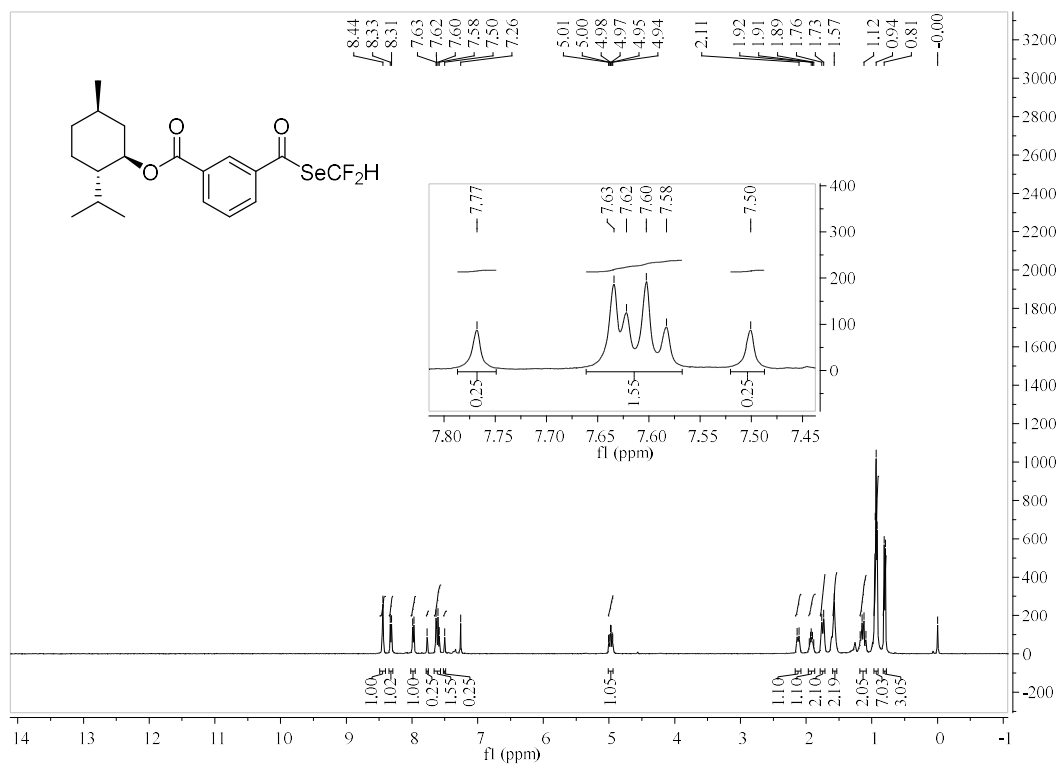

### <sup>19</sup>F NMR spectra of compound 3ca

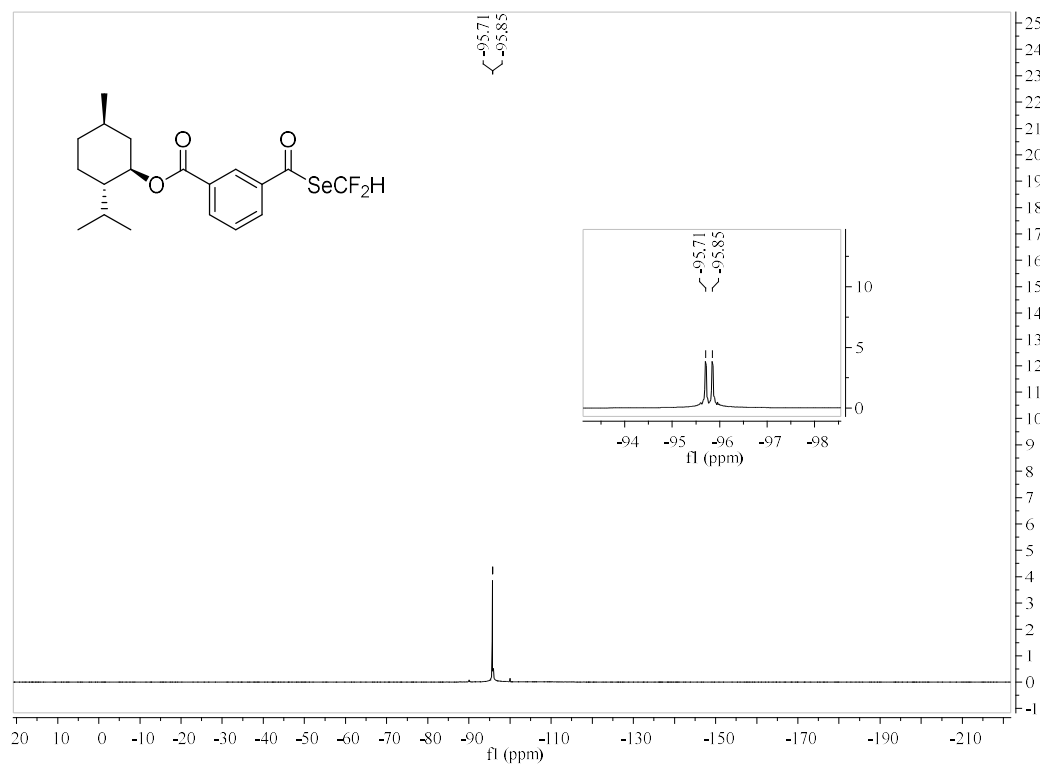

### <sup>13</sup>C NMR spectra of compound 3ca

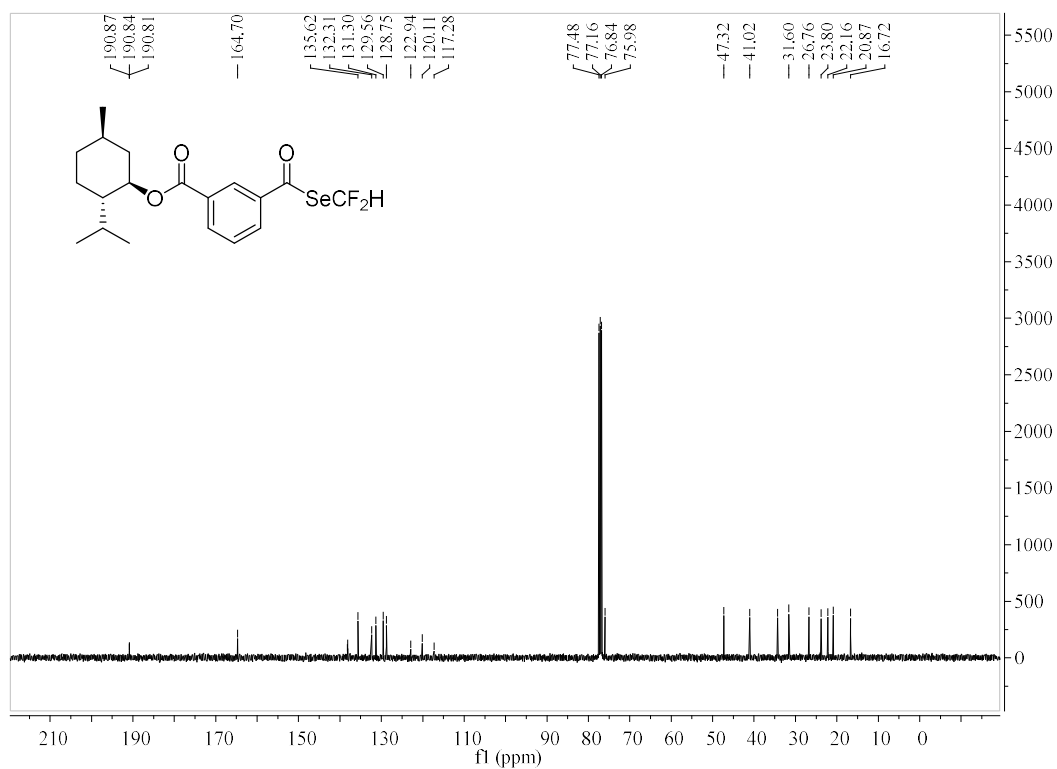

### <sup>1</sup>H NMR spectra of compound 3cb

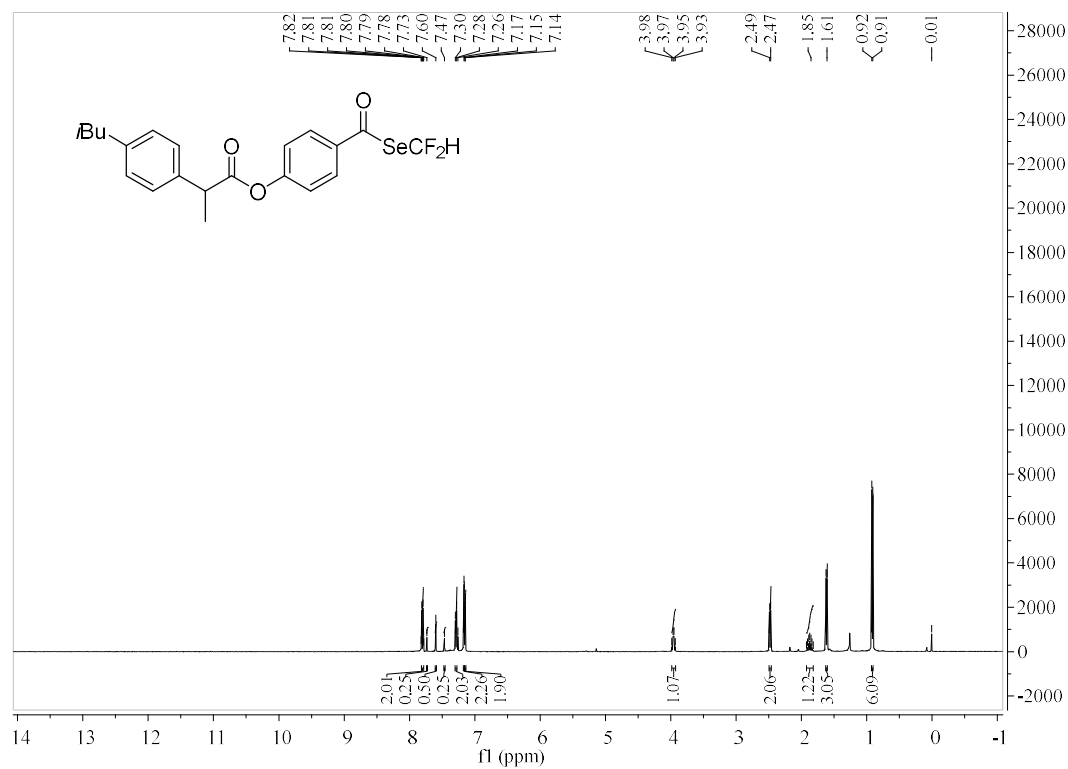

### $^{19}\text{F}$ NMR spectra of compound **3cb**

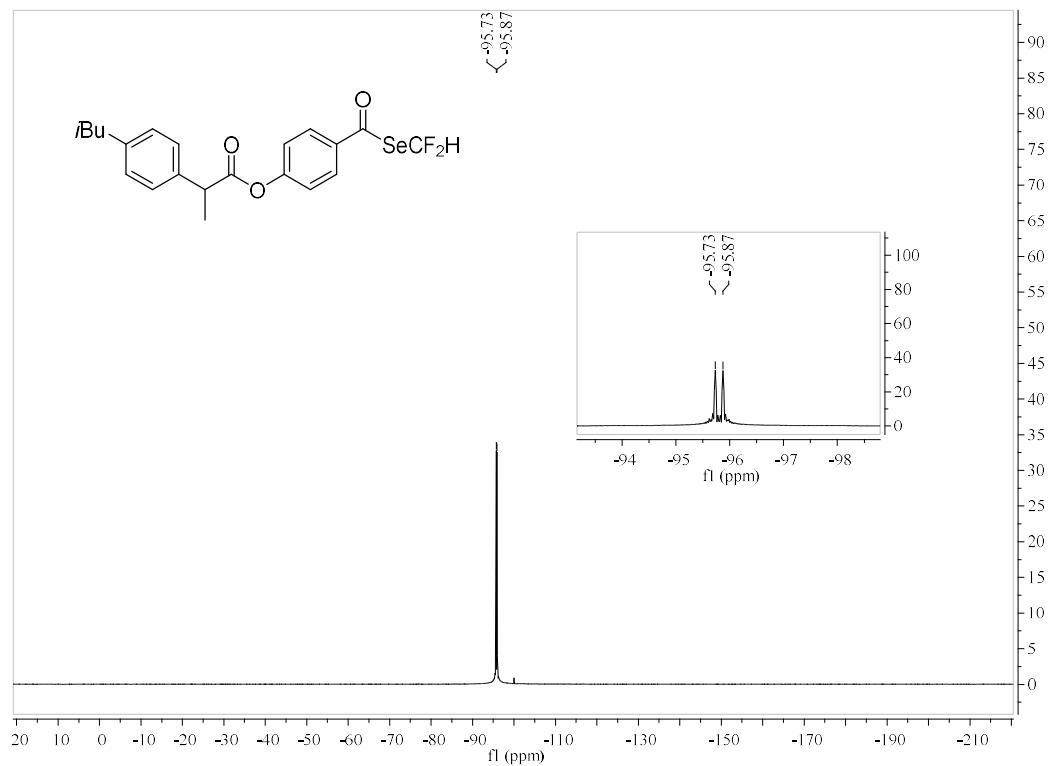

### $^{13}\text{C}$ NMR spectra of compound **3cb**

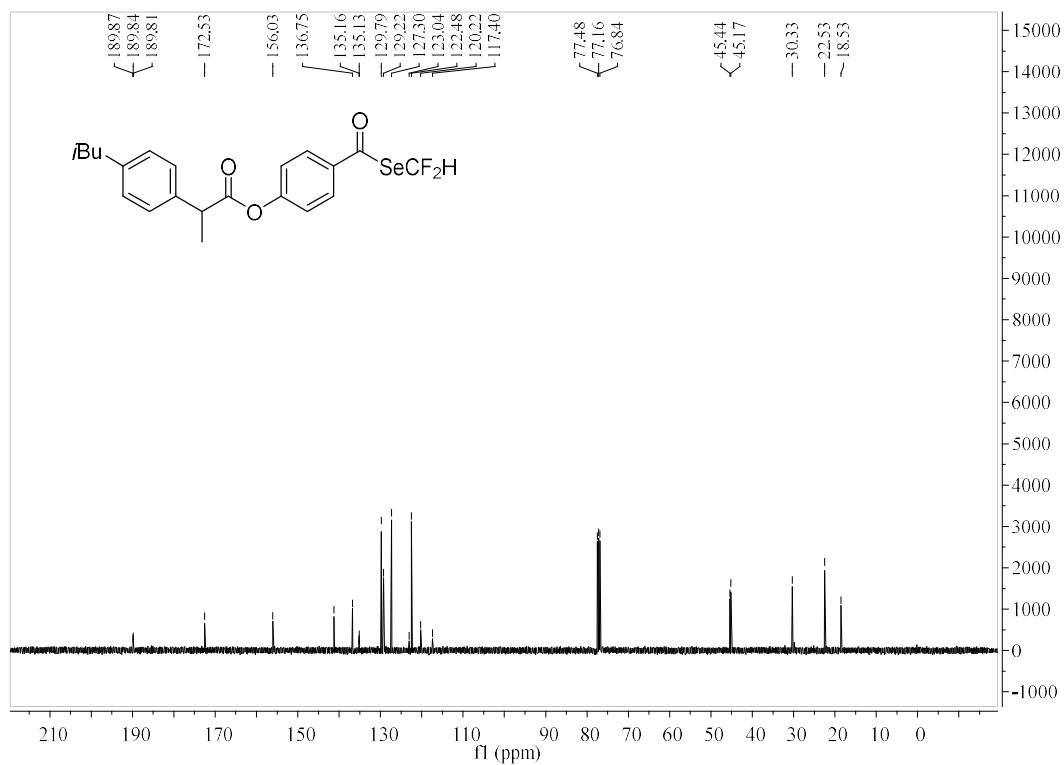

### $^1\text{H}$ NMR spectra of compound **3cc**

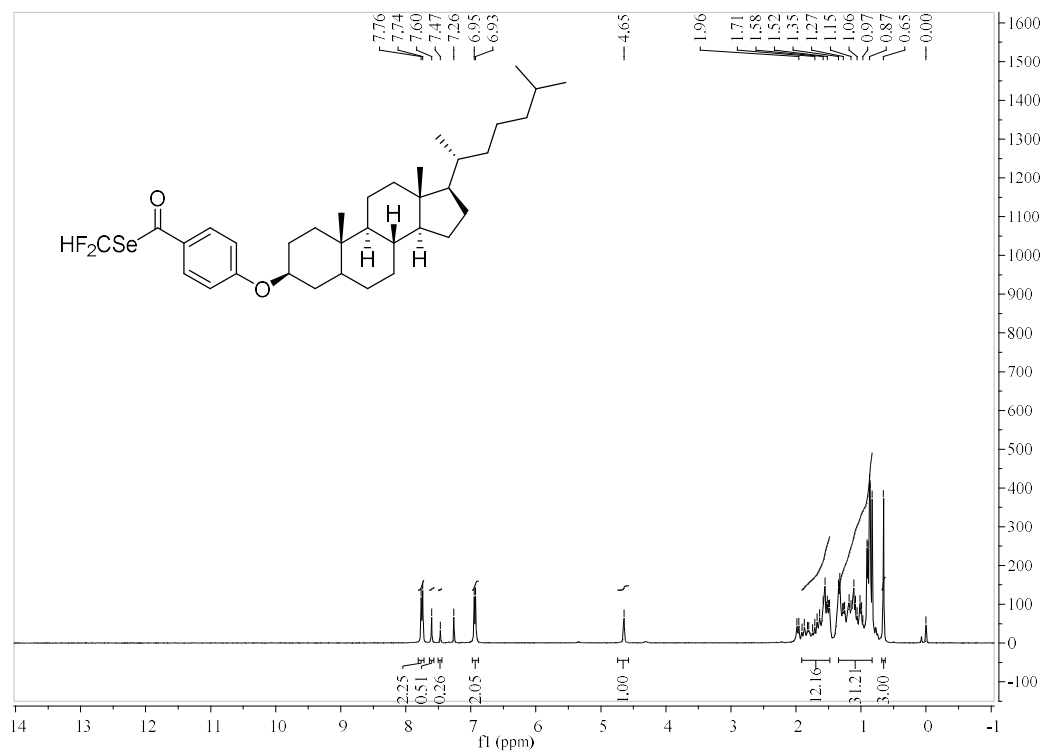

### $^{19}\text{F}$ NMR spectra of compound **3cc**

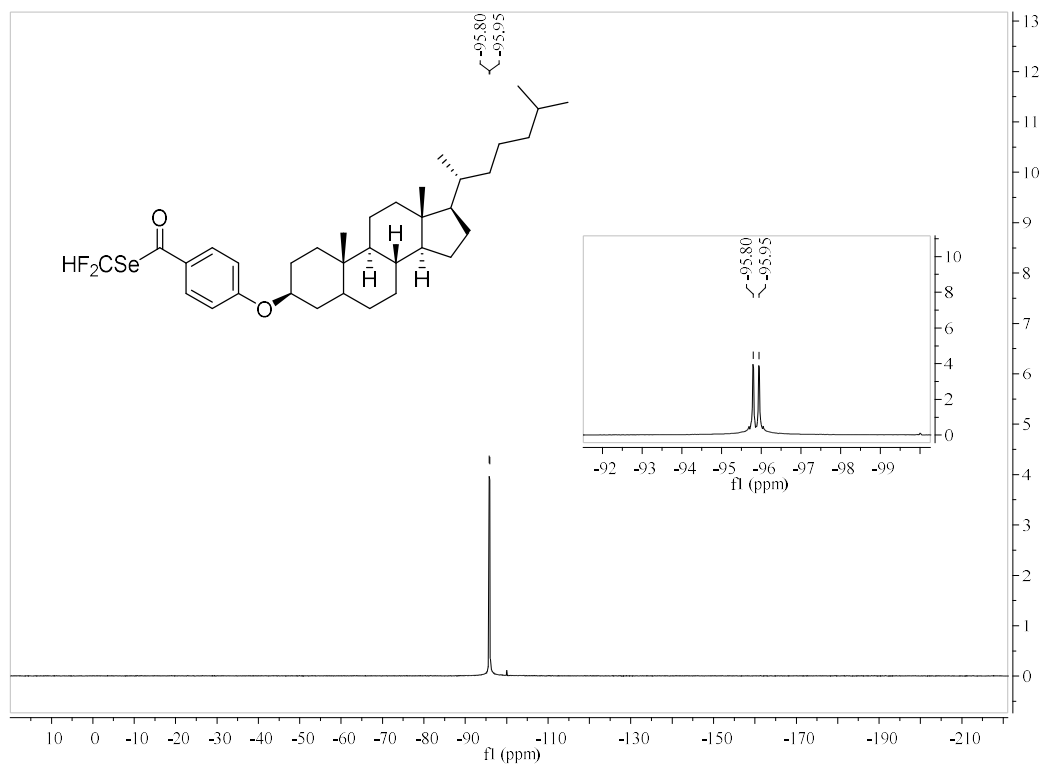

### <sup>13</sup>C NMR spectra of compound 3cc

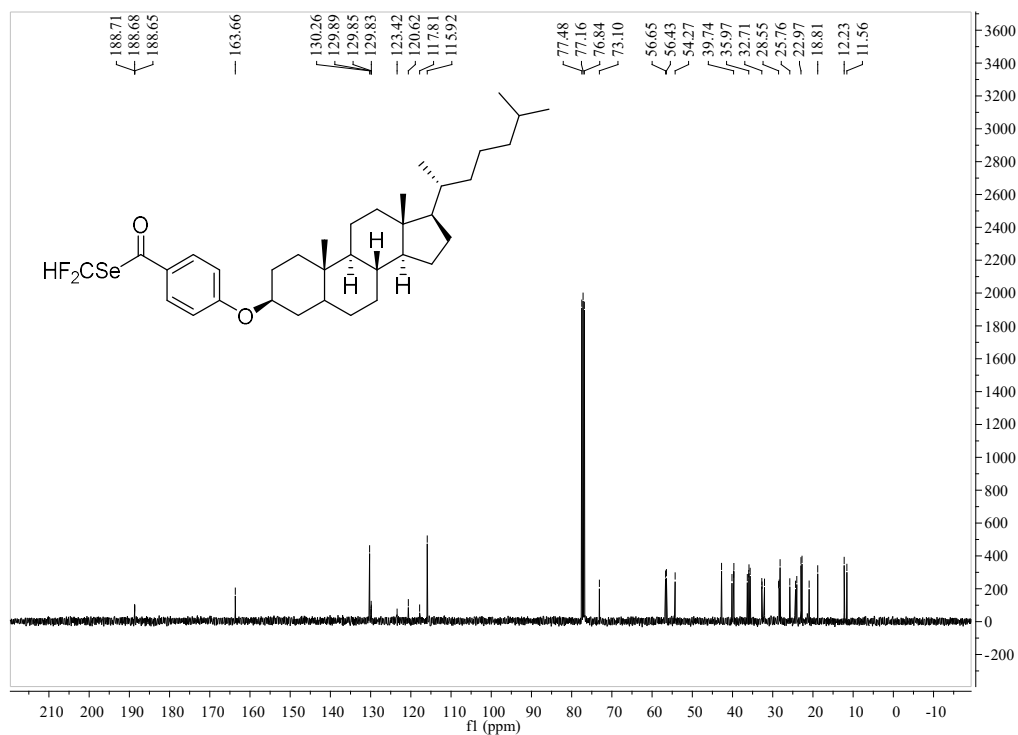

## 7. X-ray crystalstructure of compounds 3g and 3ad

### X-ray Crystal Structure of *Se*-(difluoromethyl)-4-bromobenzoselenoate (3g)(CCDC:1985689)

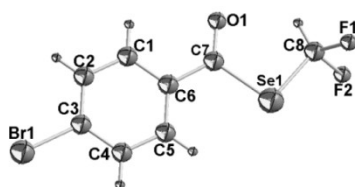

### X-ray Crystal Structure of *Se*-(difluoromethyl)-1-tosyl-1H-indole-3-carboselenoate (3ad)(CCDC:1985690)

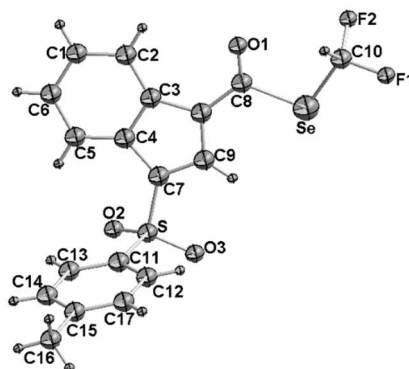

Supplement: d0cc02912b1.pdf [file d0cc02912b1.pdf]
